# Supplementary material for: GC-MS-based untargeted metabolic profiling of malignant mesothelioma plasma
Source: PeerJ. 2023 May 18;11:e15302. doi: 10.7717/peerj.15302 (PMC10200095; doi:10.7717/peerj.15302)
Supplement: Supplemental Information 1 — Plasma metabonomic analysis between patients with malignant mesothelioma and healthy controls was based on raw data above. [file peerj-11-15302-s001.xlsx]

## Sheet: file explanation
Header name	Description
Alignment ID	The unique data number of the substance in this qualitative analysis
Average Rt(min)	Average retention time
Average RI	Average retention index
Quant mass	Quantitative ion fragment
Metabolite name	The name of the substance obtained by qualitative analysis
Total score	Total similarity score
QC-2	QC-2 Relative quantitative value of sample
QC-3	QC-3 Relative quantitative value of sample
QC-4	QC-4 Relative quantitative value of sample
QC-5	QC-5 Relative quantitative value of sample
QC-6	QC-6 Relative quantitative value of sample
QC-7	QC-7 Relative quantitative value of sample
MM1	MM1 Relative quantitative value of sample
MM2	MM2 Relative quantitative value of sample
MM6	MM6 Relative quantitative value of sample
MM7	MM7 Relative quantitative value of sample
MM9	MM9 Relative quantitative value of sample
MM10	MM10 Relative quantitative value of sample
MM11	MM11 Relative quantitative value of sample
MM12	MM12 Relative quantitative value of sample
MM13	MM13 Relative quantitative value of sample
MM14	MM14 Relative quantitative value of sample
MM15	MM15 Relative quantitative value of sample
MM16	MM16 Relative quantitative value of sample
MM17	MM17 Relative quantitative value of sample
MM19	MM19 Relative quantitative value of sample
MM20	MM20 Relative quantitative value of sample
MM21	MM21 Relative quantitative value of sample
MM22	MM22 Relative quantitative value of sample
MM24	MM24 Relative quantitative value of sample
MM25	MM25 Relative quantitative value of sample
A01	A01 Relative quantitative value of sample
A02	A02 Relative quantitative value of sample
A04	A04 Relative quantitative value of sample
A07	A07 Relative quantitative value of sample
A13	A13 Relative quantitative value of sample
A14	A14 Relative quantitative value of sample
A15	A15 Relative quantitative value of sample
A16	A16 Relative quantitative value of sample
A20	A20 Relative quantitative value of sample
A43	A43 Relative quantitative value of sample
A46	A46 Relative quantitative value of sample
A50	A50 Relative quantitative value of sample
B12	B12 Relative quantitative value of sample
B17	B17 Relative quantitative value of sample
B18	B18 Relative quantitative value of sample
B23	B23 Relative quantitative value of sample
B25	B25 Relative quantitative value of sample
B27	B27 Relative quantitative value of sample
B31	B31 Relative quantitative value of sample
B34	B34 Relative quantitative value of sample
B38	B38 Relative quantitative value of sample
B100	B100 Relative quantitative value of sample

## Sheet: Grouping information
ID	Group	Age	gender	Gender	Site	Asbestos exposure
MM1	MM	70	1	male	Peritoneal mesothelioma	yes
MM2	MM	49	1	male	Pleural mesothelioma	no
MM6	MM	43	2	female	Pleural mesothelioma	no
MM7	MM	55	2	female	Peritoneal mesothelioma	yes
MM9	MM	55	1	male	Pleural mesothelioma	no
MM10	MM	77	1	male	Pleural mesothelioma	no
MM11	MM	64	1	male	Pleural mesothelioma	no
MM12	MM	51	1	male	Pleural mesothelioma	no
MM13	MM	69	1	male	Pleural mesothelioma	no
MM14	MM	59	1	male	Peritoneal mesothelioma	yes
MM15	MM	47	2	female	Pleural mesothelioma	no
MM16	MM	66	2	female	Peritoneal mesothelioma	yes
MM17	MM	69	2	female	Pleural mesothelioma	no
MM19	MM	61	1	male	Peritoneal mesothelioma	yes
MM20	MM	58	2	female	Peritoneal mesothelioma	yes
MM21	MM	52	1	male	Pleural mesothelioma	no
MM22	MM	52	1	male	Pleural mesothelioma	no
MM24	MM	55	2	female	Peritoneal mesothelioma	yes
MM25	MM	47	2	female	Pleural mesothelioma	no
A01	HC	66	1	male
A02	HC	45	1	male
A04	HC	48	2	female
A07	HC	55	1	male
A13	HC	55	1	male
A14	HC	74	2	female
A15	HC	64	1	male
A16	HC	56	2	female
A20	HC	69	1	male
A43	HC	59	1	male
A46	HC	47	2	female
A50	HC	62	1	male
B12	HC	69	2	female
B17	HC	65	1	male
B18	HC	54	2	female
B23	HC	59	2	female
B25	HC	52	1	male
B27	HC	55	2	female
B31	HC	47	1	male
B34	HC	64	2	female
B38	HC	49	2	female
B100	HC	54	1	male

## Sheet: Data matrix
Alignment ID	Average Rt(min)	Average RI	Quant mass	Metabolite name	Total score	QC-2	QC-3	QC-4	QC-5	QC-6	QC-7	MM1	MM2	MM6	MM7	MM9	MM10	MM11	MM12	MM13	MM14	MM15	MM16	MM17	MM19	MM20	MM21	MM22	MM24	MM25	A01	A02	A04	A07	A13	A14	A15	A16	A20	A43	A46	A50	B12	B17	B18	B23	B25	B27	B31
1	5.161	262157	170	N-(hydroxymethyl)trifluoroacetamide	82.3	6.85796e-05	0.000279235	4.24347e-05	3.69605e-05	0.000264125	0.000328653	0.000323276	0.000203189	0.000655984	0.00063106	8.28459e-05	0.000247805	3.96587e-05	0.000219785	0.000276611	0.000164736	0.000433561	0.000132355	0.000306017	0.000288526	0.000427871	0.000183572	0.000290464	0.000269725	0.000216268	8.16904e-05	3.41824e-05	0.00024934	0.000174651	0.000169176	0.000341894	0.000241586	0.000248553	0.000284038	0.000154301	0.000360537	9.03421e-05	0.000269311	0.000254168	0.000151094	0.000135422	6.76977e-05	0.000381818	4.58751e-05
4	5.174	262157	103	Homoserine	84	0.00202296	0.00213129	0.00201787	0.00208959	0.00105061	0.0025614	0.00244225	0.00231936	0.00238846	0.00235607	0.00247251	0.00239603	0.00233847	0.00264787	0.00254449	0.0023126	0.00269568	0.00249565	0.00225988	0.0021857	0.00222423	0.00236148	0.00236858	0.00222246	0.00257289	0.0023611	0.00259454	0.00246076	0.00250902	0.00195343	0.00242943	0.00232168	0.00263074	0.00204397	0.00242651	0.00257797	0.0022117	0.00234183	0.00253142	0.00279292	0.00223559	0.00251364	0.00173567	0.00225271
6	5.209	262159	174.1	Ethylamine	98.1	0.382901	0.389804	0.387937	0.386245	0.39954	0.390381	0.371977	0.381883	0.351163	0.351397	0.400795	0.389405	0.374844	0.359203	0.397845	0.376363	0.385177	0.381353	0.385755	0.386795	0.379935	0.353786	0.36694	0.393253	0.376899	0.398759	0.362408	0.380089	0.366483	0.341396	0.384677	0.350046	0.370536	0.355499	0.362378	0.362081	0.354908	0.345968	0.374798	0.3851	0.387918	0.374302	0.34152	0.410073
10	5.304	262165	163.006	Dimethylethanolamine	75.9	0.00713564	0.00671846	0.00574086	0.00602077	0.00633145	0.00651513	0.00437943	0.00873593	0.00519217	0.00463693	0.00614017	0.00888644	0.00760687	0.00350942	0.00430983	0.0038417	0.00461367	0.00446652	0.00497229	0.00658516	0.00391388	0.00394983	0.00493939	0.0058154	0.00728521	0.00860218	0.00612192	0.00716775	0.0040246	0.00452628	0.0047618	0.00574727	0.00482683	0.00515186	0.00499258	0.00545839	0.00550857	0.00463581	0.00522304	0.00511741	0.00598746	0.0056087	0.00499699	0.0059552
12	5.307	262165	116.1	Sarcosine	86.9	0.00023835	0.000204692	0.00010357	0.000163139	0.0142337	0.0123011	0.000253773	0.0001172	0.000118611	0.000901986	0.000972235	0.000780407	0.000567099	0.000262029	0.000218011	0.000286117	0.000164495	0.000707474	0.00029689	0.000359939	0.00104314	0.000282839	0.00105464	0.000375582	0.000983955	0.000879296	0.000395711	0.000208104	0.000704439	0.00622821	0.000231723	0.000423963	0.000348308	0.000415459	0.00015268	0.000258328	0.000703092	0.000223336	0.000522767	0.000597297	0.000720618	0.000339656	0.00945281	0.000911424
15	5.328	262166	171.1	Methylamine	95.1	0.45437	0.467973	0.469188	0.458228	0.450099	0.414306	0.505867	0.456418	0.377687	0.34742	0.522688	0.680482	0.946924	0.518324	0.586594	0.637186	0.505373	1.18389	0.780911	0.994251	0.394772	0.671279	0.56762	1.08972	0.467511	0.562966	0.633588	0.669166	0.888989	0.483638	0.660265	0.595838	0.626163	0.666982	0.468915	0.550406	0.374096	0.52454	0.678268	0.712387	0.546976	0.599795	0.279823	0.499774
16	5.38	262169	127.1	2-ketoadipic acid	81.3	0.042092	0.0457283	0.045158	0.0471943	0.0461141	0.0470123	0.0502902	0.052374	0.0502494	0.0508278	0.0569022	0.0497077	0.0392574	0.0491034	0.0554293	0.055404	0.0543211	0.0500067	0.0576528	0.0561451	0.0582318	0.0537725	0.0561463	0.0532384	0.0524246	0.0521308	0.0448428	0.0480601	0.0505123	0.04472	0.0545754	0.0492901	0.0541286	0.0451562	0.0565473	0.0498178	0.0455968	0.0519439	0.0488236	0.0459147	0.0505248	0.0505308	0.0463202	0.059013
19	5.463	262174	92.025	Abietic acid	65.4	0.000158759	0.00019181	0.000135319	0.000237678	0.000173027	0.000171205	0.000124724	0.000246126	0.000309608	0.000199571	0.000236947	0.000316066	0.000184169	0.000216158	0.000220116	0.000230594	0.000334416	0.000231928	0.000432971	0.000248184	0.000221899	0.000220105	0.000228042	0.000218685	0.000270217	0.000265677	0.00015833	0.000228893	0.000252314	0.000137466	0.000250824	0.000219074	0.000212124	0.000163085	0.000273487	0.000216198	0.000150057	0.000141367	0.000225064	0.000225561	0.000210245	0.000162635	0.000192531	0.000255146
21	5.523	262178	220.098	Resorcinol	75.8	0.00129975	0.0012349	0.00125544	0.00126415	0.00128677	0.00122055	0.00126404	0.00134746	0.00121357	0.00137121	0.00137375	0.00128502	0.00136687	0.00125058	0.00130044	0.00132863	0.00123564	0.00138088	0.0013589	0.0013185	0.00127049	0.00129236	0.00125208	0.00139392	0.00131049	0.00125515	0.00124069	0.00130449	0.00125642	0.00100368	0.00145433	0.00115442	0.00125344	0.00120006	0.00116476	0.00123817	0.00117058	0.00118845	0.00129079	0.00138617	0.00123142	0.0012874	0.00112364	0.00133291
22	5.534	262178	281.1	2',6'-dihydroxyacetophenone	86.4	0.0160701	0.0290957	0.0365951	0.0407076	0.0432902	0.0436384	0.00230102	0.00324166	0.00299407	0.00304249	0.00283376	0.0024185	0.00287077	0.00244392	0.00370289	0.00262319	0.00305014	0.00367023	0.00269834	0.00333076	0.00318923	0.00275297	0.00375205	0.00399682	0.00422197	0.00395568	5.35694e-05	0.00396658	0.00356133	0.00299426	0.00351422	0.00291996	0.0034424	3.46428e-05	0.00479829	0.00437873	0.00280446	0.00294964	0.00387274	0.00325202	0.00460284	0.00357484	0.00317273	0.00341723
24	5.561	262180	87.098	3,4-dihydroxybenzoic acid	79	0.00601275	0.00604464	0.00606125	0.00613914	0.00619159	0.00610405	0.00612685	0.00626798	0.00588559	0.00577987	0.0063805	0.00611498	0.00609061	0.00585392	0.00649026	0.00609099	0.00644794	0.00556623	0.00626355	0.00625471	0.006593	0.00576449	0.0062416	0.00577718	0.00612117	0.00641231	0.00562181	0.00596274	0.0057894	0.005894	0.00598775	0.00581223	0.00613286	0.00562073	0.00599426	0.0059609	0.00561073	0.00587409	0.0058714	0.00604909	0.00616057	0.00603019	0.00551292	0.00673389
25	5.578	262181	221.1	Boric acid	94	0.0119429	0.0122317	0.0123769	0.0121153	0.0122163	0.01208	0.0191893	0.0205411	0.0224223	0.0183653	0.0179784	0.0199062	0.0270842	0.0200948	0.0241206	0.0311743	0.0267197	0.011152	0.0143819	0.0293384	0.0221721	0.0174363	0.018973	0.0196199	0.0149235	0.0328047	0.017314	0.0199282	0.0103235	0.0202651	0.0176425	0.0153125	0.0154479	0.0157809	0.0168246	0.0155197	0.00937193	0.0147512	0.0146204	0.0177231	0.0314657	0.019359	0.0156329	0.0370067
27	5.644	262185	147.1	Ethylene glycol	91.2	0.00458862	0.00468516	0.0045623	0.00481611	0.00468316	0.00452181	0.00999902	0.0120548	0.0101662	0.00452073	0.00833675	0.00503521	0.00313648	0.00398142	0.00303191	0.00454376	0.00445317	0.00683051	0.00341944	0.00630033	0.0105629	0.0113	0.00803504	0.0104966	0.00919077	0.0066986	0.00556139	0.0066107	0.00491201	0.00428792	0.00543762	0.00409279	0.00428151	0.00427223	0.00465825	0.00508713	0.00528568	0.00793486	0.00420617	0.00488099	0.0126124	0.00455734	0.0113561	0.00560479
30	5.695	262188	160.036	Dimethylglycine	95.3	0.0019161	0.00192998	0.00198402	0.0021311	0.0021128	0.00219317	0.00196114	0.00289301	0.00146017	0.00154941	0.00185758	0.00684911	0.00156178	0.00148355	0.00147034	0.00338039	0.00204377	0.00243569	0.00295457	0.00174163	0.00186457	0.00197081	0.00177445	0.00261005	0.00165472	0.0020446	0.00133343	0.00132857	0.0013811	0.0027292	0.00253026	0.00125408	0.00134959	0.00116612	0.00120841	0.0013509	0.00205788	0.00208483	0.00125502	0.00130586	0.00139182	0.00157365	0.00643337	0.00136901
32	5.779	262193	283.094	Butane-2,3-diol	80.4	0.000220434	0.000438273	0.000309069	0.000387219	0.000374211	0.000330669	2.34818e-06	4.87452e-06	2.66282e-05	1.71036e-05	8.87937e-06	5.73778e-06	7.73378e-06	6.65858e-05	5.4968e-06	2.46651e-05	1.42418e-05	1.77285e-05	2.15212e-05	6.94599e-06	4.23657e-05	7.93259e-06	1.13714e-05	6.45906e-05	1.59197e-05	0.000109624	0.000963907	0.000253971	0.000581008	0.000172794	1.09684e-05	0.000468753	0.000508573	0.0016294	8.87339e-06	0.000294733	0.000997325	0.000111901	0.00205633	0.00122807	1.23128e-05	0.000404858	1.24571e-05	1.2245e-05
39	5.975	262204	183	Malonic acid	68.6	0.000258419	0.000251229	0.000264555	0.000269764	0.000300262	0.000285383	0.000272593	0.000278815	0.000244981	0.000263718	0.000305059	0.000263371	0.000270595	0.000268491	0.000271419	0.000276485	0.000302557	0.000265813	0.000275127	0.000265366	0.00029512	0.000263126	0.000268894	0.000261201	0.000302552	0.000263205	0.000243709	0.000265307	0.000271799	0.000250401	0.000298391	0.000257137	0.000254745	0.00022814	0.000261972	0.000251625	0.000264042	0.00024384	0.000270785	0.000259701	0.000277224	0.000282684	0.000267871	0.000293664
41	6.07	262210	157.089	Tiglic acid	92.8	0.00478642	0.00466031	0.00472895	0.00487337	0.00477672	0.00480882	0.00481913	0.00527072	0.00485058	0.00494686	0.00523021	0.00493755	0.00505936	0.00481439	0.00520348	0.0048532	0.00487845	0.00477469	0.00520635	0.00502186	0.00509038	0.00476798	0.00492532	0.00508906	0.00503042	0.00525589	0.00453121	0.00491116	0.00478616	0.00471086	0.00535667	0.00451087	0.00504472	0.00457431	0.0049618	0.00486703	0.00479575	0.0047215	0.00484752	0.00484103	0.00489322	0.00490953	0.00474232	0.00537985
44	6.127	262213	104.033	Methoxyamine	78.1	0.00088721	0.000860365	0.000874595	0.000654012	0.000793171	0.000840352	0.00153436	0.00110407	0.00126449	0.00204247	0.00175548	0.00193278	0.000717565	0.00141696	0.00180081	0.00148385	0.00180275	0.0010213	0.00201873	0.00110034	0.00159227	0.00177572	0.00135908	0.00117499	0.00213668	0.00113471	0.00098822	0.00100018	0.00115114	0.00109891	0.00109962	0.000957169	0.00115086	0.00111492	0.00136567	0.000988309	0.000812144	0.000820142	0.000925142	0.00094673	0.00108761	0.000991328	0.0023369	0.00154574
45	6.174	262216	111	Acrylic acid	72.8	0.000171504	0.00016729	3.62938e-05	0.000218925	0.000137803	0.000208297	0.000798325	0.000765742	0.000162581	0.000306986	0.0001629	0.000191877	0.000167164	0.000143678	0.000183307	0.00133492	0.00137393	0.000536532	0.000149649	0.000200999	0.000277044	0.000323597	0.000221678	0.00101172	0.000214749	0.000292891	0.000248848	0.000208374	0.0001928	0.00022477	0.000942986	0.000295078	0.000237818	0.000153771	0.00021987	0.000172935	2.89796e-05	0.000326105	0.000211296	0.00021338	0.000208913	0.000201825	0.000167159	0.00024
47	6.215	262218	174.1	1-propylamine	92.5	0.0160372	0.0167508	0.0173907	0.0179575	0.018758	0.0185678	0.0163594	0.0188821	0.0162741	0.0166543	0.0173703	0.0164508	0.0169257	0.0162543	0.0172919	0.0179907	0.0173726	0.0182237	0.0177648	0.0176946	0.0177828	0.0158166	0.0168356	0.0192415	0.0166592	0.0187958	0.0167961	0.0183815	0.0172441	0.0169705	0.0202248	0.0172043	0.0183479	0.016935	0.0175148	0.0172523	0.0175766	0.0186709	0.0183182	0.017434	0.0176358	0.0177789	0.0162638	0.0184551
51	6.298	262223	186.1	Allylamine	86.3	0.00266879	0.00270967	0.00260149	0.00269285	0.0026286	0.00269173	0.00257759	0.00296351	0.00271643	0.00274114	0.00287107	0.00286077	0.0028583	0.00262353	0.00268346	0.00259352	0.00258139	0.00266867	0.00271913	0.00298693	0.00278337	0.00245042	0.00261115	0.00218457	0.00202328	0.00290538	0.00240279	0.00277505	0.00246387	0.00244442	0.00287043	0.00245009	0.00255438	0.0023404	0.00258997	0.00255909	0.00251337	0.00258888	0.00254808	0.00248098	0.00287148	0.00250853	0.00210157	0.00283404
54	6.395	262228	106.095	Benzoic acid	67.9	0.00357935	0.00366519	0.00379365	0.00367228	0.00370077	0.00373158	0.00375809	0.00392603	0.00368559	0.00370876	0.00393352	0.0038872	0.00365926	0.00366954	0.00375942	0.00357348	0.00366679	0.0034575	0.00376617	0.00371167	0.00379055	0.00356122	0.00358028	0.00366143	0.003706	0.0036905	0.00342643	0.0036135	0.00344786	0.00346577	0.00370309	0.00336993	0.00350137	0.0034219	0.00347371	0.00345953	0.0033807	0.00333018	0.00359606	0.00369478	0.00373976	0.00353699	0.0035263	0.00387207
55	6.406	262229	170	Epsilon-caprolactam	79.7	0.000259735	0.000278842	0.000262653	6.42954e-05	0.00027098	0.000236132	0.000272052	0.000317237	0.000230215	0.000419707	0.000445204	0.000666777	0.000331477	0.000420333	0.00067534	0.000408921	0.00049151	0.000306679	0.000595178	0.000179835	0.000472782	0.000387804	0.000506691	0.00043088	0.000610758	0.000644427	0.000539351	0.000563323	0.000692577	0.000409831	0.000530342	0.00075898	0.00101298	0.00084879	0.000596199	0.000851811	0.000440358	0.000321055	0.00091542	0.00120029	0.000323341	0.00102686	0.000123912	0.000574797
56	6.45	262232	318.085	Norvaline	72	0.00398432	0.00406693	0.00448917	0.00460646	0.00477439	0.00485587	0.00402419	0.00506143	0.00468523	0.00507295	0.00564674	0.0050403	0.00450179	0.00427049	0.00475672	0.00452891	0.00448727	0.00454096	0.00532034	0.00539503	0.00499746	0.0044927	0.00515476	0.00528626	0.00557908	0.0054143	0.00362783	0.00473222	0.00391037	0.00508485	0.00510435	0.00387733	0.00414788	0.00368894	0.00433504	0.00378395	0.00418533	0.00399328	0.00386531	0.00381708	0.00479298	0.00397772	0.00598178	0.00542675
61	6.617	262241	174.067	Pyruvic acid	97	0.0247152	0.0245658	0.0249948	0.0252292	0.0254532	0.0252699	0.00572414	0.0281155	0.0420332	0.0105784	0.0294743	0.0347207	0.0715058	0.0277356	0.0131048	0.00905362	0.0245117	0.0158981	0.0287296	0.0836292	0.00695389	0.0089241	0.0185486	0.0220432	0.0218318	0.055802	0.0234389	0.056931	0.0129826	0.0172595	0.0161553	0.031544	0.0161545	0.0188774	0.0211128	0.0222771	0.0303884	0.00539125	0.016671	0.0170531	0.0294443	0.0219704	0.0926205	0.0374851
64	6.653	262243	154.017	Maleimide	79	7.73096e-05	0.000106111	0.000106612	9.08273e-05	8.79722e-05	7.9298e-05	0.000103259	0.000143664	7.24798e-05	7.51767e-05	9.44319e-05	7.47553e-05	6.77719e-05	6.26097e-05	7.75789e-05	9.56993e-05	0.000105505	0.000163111	9.04494e-05	0.000120747	9.82131e-05	6.52963e-05	8.48761e-05	0.000200969	9.81225e-05	0.00025727	0.000130376	0.000128795	0.000102459	8.68852e-05	9.21508e-05	0.000119609	0.000107387	0.000114168	8.12981e-05	7.74385e-05	0.000138871	9.45614e-05	0.000121995	8.78325e-05	9.57329e-05	6.49248e-05	0.000110451	9.80744e-05
66	6.738	262248	174.1	Diethylcarbamic acid	97	0.0208751	0.0216677	0.0224776	0.0230952	0.0241653	0.0242485	0.0314563	0.027437	0.0303213	0.0453896	0.0438079	0.0588387	0.0260099	0.0406067	0.0486509	0.0436272	0.0441534	0.0260975	0.0486065	0.0280095	0.0418102	0.0439841	0.0408542	0.0358879	0.0598163	0.0394604	0.0274255	0.0377124	0.0341284	0.0443526	0.0393386	0.0338041	0.0409374	0.0365019	0.0347182	0.0337412	0.0291575	0.0265398	0.0339144	0.0323397	0.0267707	0.0372041	0.0500062	0.0432525
67	6.779	262251	117.1	Acetic acid	83.5	0.905068	0.909701	0.906122	0.903241	0.895137	0.899832	1.29365	1.85389	1.55823	0.896112	0.848225	0.762877	2.1456	0.927724	0.783028	0.756789	1.07981	1.47544	0.78768	1.9309	0.561692	0.829714	1.43276	2.51032	0.696566	1.7321	1.36346	1.54539	1.00047	0.880561	1.13528	1.19317	1.07168	0.750911	0.975364	1.06002	0.938737	1.03067	0.918975	0.792775	1.22178	0.772782	1.32418	1.31298
68	6.781	262251	147.1	L-lactic acid	99.9	1.04754	1.05421	1.05415	1.05012	1.04047	1.04659	1.48902	2.13566	1.79875	1.03922	0.982469	0.885267	2.47096	1.07749	0.909125	0.878557	1.24939	1.70605	0.917426	2.23062	0.658141	0.962468	1.6582	2.89304	0.814551	2.00589	1.57693	1.78846	1.16494	1.02542	1.32162	1.38538	1.24457	0.875834	1.13625	1.2317	1.09153	1.19855	1.07049	0.924167	1.41702	0.90246	1.54109	1.5205
69	6.803	262252	147.1	Sulfuric acid	81.2	0.00566963	0.00569268	0.00572381	0.00703986	0.00614003	0.00593808	0.0146571	2.1481	1.80996	0.0168388	0.0172747	0.0500365	2.48694	0.0245522	0.0262601	0.029269	0.0226629	0.0139206	0.0319872	2.24913	0.0200262	0.0294028	1.65641	2.92185	0.0248351	2.02168	0.015697	0.016149	0.0332629	0.0153174	0.0206461	0.0213518	0.0273328	0.0303782	0.0174442	0.0174924	0.00903636	0.0116335	0.0219632	0.0227037	0.00806436	0.021999	1.54444	0.0136256
70	6.856	262255	147.1	Carbamic acid	96.8	0.00566963	0.00598583	0.00648375	0.0078427	0.00704165	0.00709672	0.017143	0.0125992	0.0109315	0.0170168	0.0176858	0.0497046	0.0248024	0.0257602	0.0266769	0.0288313	0.0235343	0.0165575	0.0322356	0.0177496	0.0197963	0.0294028	0.0183553	0.0528835	0.0238181	0.0153343	0.0185176	0.0190823	0.0332629	0.0157076	0.0215818	0.0228854	0.0280664	0.0303782	0.0174442	0.0189292	0.0094463	0.0123461	0.0224113	0.0229458	0.00865873	0.0217897	0.0203334	0.0151009
75	7.044	262266	147.1	Glycolic acid	97.1	0.00571767	0.00591197	0.00613817	0.00625821	0.00640197	0.00652107	0.0109836	0.000320108	0.00703882	0.0110537	0.00941553	0.0102932	0.0068142	0.00938101	0.00783848	0.0174974	0.00981394	0.00825964	0.0102293	0.00718973	0.0100562	0.0100158	0.00828284	0.0139886	0.00774497	0.00892005	0.00863062	0.0103752	0.00668158	0.00560626	0.0136659	0.00712487	0.00834912	0.00583268	0.0077216	0.00696302	0.00582433	0.00663833	0.00730635	0.00641462	0.0111777	0.00549685	0.00750654	0.00662843
76	7.085	262269	169.089	Thymidine	74.1	0.000818844	0.000853135	0.000828492	0.000825682	0.000858679	0.000849034	0.000846313	0.000882719	0.000666795	0.000660886	0.000758222	0.00069616	0.000630913	0.000639008	0.000694233	0.000731404	0.000691027	0.000676277	0.000744354	0.000736021	0.000780671	0.000654316	0.000689574	0.00087568	0.000693782	0.000687322	0.000828129	0.000726248	0.000847316	0.000699324	0.000806847	0.000765838	0.000868707	0.00079603	0.00083881	0.000695707	0.000674752	0.000734238	0.000919447	0.00087205	0.000649469	0.000745076	0.000601068	0.000734976
78	7.106	262270	99	Hexadecane	71.4	9.7128e-05	0.000199462	0.000154229	0.000115024	9.20667e-05	8.72381e-05	0.000152145	0.000302276	9.96216e-05	9.46377e-05	0.000136941	7.10774e-05	0.000155199	0.000112948	9.99382e-05	0.000165809	0.000105394	0.000108879	0.000168223	0.000182693	4.93027e-05	1.74288e-05	0.000163099	0.000247659	6.82189e-05	8.70662e-05	0.000141741	0.000172057	8.25647e-05	0.000154618	0.00017007	9.38631e-05	8.56312e-05	0.000145952	0.00015789	6.02094e-05	6.66583e-05	0.00014473	0.000150472	3.22869e-05	8.49872e-05	6.49201e-05	0.00013906	0.000128671
80	7.143	262272	143.1	2,2-dimethylpropane-1,3-diol	96.3	0.00434565	0.00443146	0.00438731	0.00446149	0.00447811	0.00458755	0.000457402	0.000581606	0.000530924	0.00050242	0.000444471	0.000413627	0.000504293	0.000404677	0.000315017	0.000471154	0.000449301	0.00038429	0.000538351	0.000614578	0.000658024	0.000303163	0.000407869	0.00060982	0.000408163	0.000587325	0.000391748	0.000568909	0.00044278	0.00010955	0.000496226	0.000463854	0.000499902	0.000506915	0.000473145	0.00039439	0.000105506	0.000389031	0.000605991	0.000410028	0.000493628	0.000491854	0.000297088	0.00054615
83	7.231	262277	217.088	2-oxo-propanoic acid	94.8	0.000346225	0.000299669	0.000282609	0.000301161	0.000320698	0.000277819	0.000253904	0.00367918	0.00164263	0.00051857	0.000296018	0.002459	0.00198782	0.000415674	0.00063744	0.000610692	0.00191658	0.0016642	0.00146026	0.0031005	0.000517424	0.000316633	0.00122367	0.00145427	0.000367853	0.00289701	0.00158413	0.00237053	0.00073301	0.000179278	0.00140842	0.003621	0.00190214	0.00235814	0.00120769	0.00148936	0.000753777	0.00140494	0.00157344	0.00161157	0.00298669	0.000899239	0.000267729	0.00165545
85	7.277	262280	109	4-(5-methyl-2-furanyl)-2-butanone	69	3.46553e-05	3.22317e-05	3.43658e-05	3.62521e-05	3.69555e-05	3.72496e-05	7.19044e-05	0.000108012	9.16851e-05	8.75268e-05	7.16717e-05	6.4043e-05	4.86155e-05	3.55482e-05	3.48994e-05	5.06981e-05	4.10299e-05	3.73235e-05	4.01392e-05	4.34804e-05	4.94367e-05	3.80173e-05	5.41567e-05	3.5848e-05	7.19922e-05	3.61705e-05	6.02083e-05	5.02037e-05	2.33853e-05	3.25383e-05	3.99828e-05	2.95964e-05	3.04334e-05	3.48285e-05	5.61363e-05	2.79025e-05	2.45387e-05	3.07324e-05	7.23918e-05	4.29112e-05	5.8586e-05	9.70387e-05	9.30827e-05	4.92454e-05
87	7.331	262283	200.1	Cyclohexylamine	76.7	0.00150735	0.00180012	0.00195901	0.00218621	0.00231163	0.00238921	0.00165876	0.00197015	0.00236853	0.00231708	0.00240465	0.002385	0.0026591	0.00225141	0.00219674	0.0020993	0.00195947	0.00246106	0.00254979	0.0026512	0.00214654	0.00211497	0.00231439	0.00256309	0.00244334	0.00292884	0.00131791	0.00257736	0.00182947	0.00237513	0.00279185	0.00171363	0.00172194	0.0016658	0.00206243	0.00198097	0.0022579	0.00187436	0.00195179	0.00188288	0.00274704	0.00227652	0.00317601	0.0026873
88	7.365	262285	174.1	L-valine	98	0.0149218	0.0178252	0.0198715	0.0215559	0.023671	0.0237193	0.0177297	0.0202801	0.0235348	0.0245578	0.0241824	0.0239155	0.0255654	0.0230434	0.0229391	0.0223967	0.0206675	0.0240337	0.0260297	0.0256246	0.0225163	0.0214968	0.023221	0.0249951	0.0242712	0.0285903	0.0140819	0.0261969	0.0190326	0.0236209	0.027453	0.0176163	0.018852	0.0178866	0.0218016	0.0202208	0.0218667	0.0192998	0.0197218	0.0194796	0.0262238	0.0238945	0.0314593	0.0266432
89	7.395	262287	154	Biphenyl	82.6	0.000892613	0.000980256	0.000820204	0.000868297	0.000939803	0.000957353	0.000508323	0.000696907	0.000647012	0.000575348	0.000643624	0.00138223	0.00051493	0.00037732	0.000624592	0.000526682	0.000487017	0.000438529	0.000567321	0.000554837	0.000554492	0.000469864	0.000600964	0.000812579	0.000676953	0.000925078	0.000670302	0.000852213	0.000827337	0.000599517	0.000706925	0.000737699	0.000798442	0.000644497	0.000642959	0.000507706	0.000716564	0.000575001	0.000716904	0.000615442	0.000442151	0.000821585	0.000586199	0.000730118
90	7.49	262292	116.1	L-alanine	95.4	0.30988	0.312552	0.313009	0.31447	0.315756	0.314298	0.270982	0.598568	0.379052	0.219383	0.298712	0.227332	0.495997	0.0990099	0.132039	0.31024	0.177672	0.514396	0.229196	0.451018	0.210195	0.178529	0.265532	0.484255	0.168449	0.544415	0.231899	0.237409	0.352735	0.342017	0.356316	0.291621	0.245736	0.189427	0.250253	0.23421	0.312243	0.312588	0.292932	0.201376	0.504822	0.194787	0.484266	0.279287
91	7.497	262293	190.1	5-aminovaleric acid	72	0.0164833	0.0168917	0.0168526	0.0170126	0.0170946	0.0169391	0.0141858	0.0340932	0.0204717	0.0114519	0.0158192	0.0118899	0.0276804	0.00522177	0.00677341	0.0164829	0.00927492	0.0291273	0.0119242	0.0246622	0.010938	0.00919663	0.0137879	0.0270494	0.00884462	0.0307946	0.0122593	0.0125758	0.0188856	0.018555	0.0193896	0.0155125	0.013014	0.00981585	0.013186	0.0123235	0.016728	0.0166058	0.0154591	0.0106218	0.0287774	0.0101438	0.0271194	0.0146533
92	7.545	262296	146	Hydroxylamine	79.7	0.000161143	0.000149605	0.000207556	0.000199108	0.000159793	0.000184189	0.00026816	0.000234785	0.000334483	0.000334811	0.000158312	0.000254096	0.000267272	0.000282048	0.000296871	0.00022068	0.00026053	0.000274614	0.000263115	0.0002593	0.000284764	0.0003044	0.000282495	0.000239534	0.000228927	0.000252971	0.000169599	0.000243705	0.000196306	0.000157934	0.00024099	0.000163529	0.000220029	0.000236377	0.00023086	0.00019801	0.000132706	0.00010543	0.000158143	0.000126094	0.00028923	0.000183931	0.000294333	0.000265113
93	7.558	262296	174.1	1-butylamine	97.7	0.00653412	0.00670086	0.00666452	0.00669094	0.00678746	0.00674144	0.00708266	0.00734735	0.00707782	0.00749972	0.00743341	0.0073832	0.00742107	0.00748043	0.00751704	0.00681912	0.00700994	0.00671598	0.00749008	0.00732426	0.0074054	0.00688613	0.00699298	0.00722825	0.00727565	0.00701488	0.0062911	0.00728301	0.00655646	0.00604694	0.00732399	0.00626006	0.00675737	0.00629381	0.00706214	0.00664374	0.00639736	0.00653589	0.00662115	0.00656502	0.00700139	0.00685438	0.006677	0.00762427
94	7.632	262301	89.1	2-ketoisovaleric acid	85.7	0.00152071	0.00153356	0.00155567	0.00161613	0.00166725	0.00162462	0.00161888	0.000259791	0.00146867	0.00169419	0.00285733	0.00131889	0.000966857	0.0016107	0.0010828	0.00149622	0.00181749	0.000217291	0.0018188	0.00151228	0.000153194	0.00131493	0.00124705	0.0012173	0.00196916	0.00264729	0.00125765	0.00147947	0.000208454	0.00174896	0.000261735	0.000197519	0.000232283	0.000164915	0.000231364	0.00099545	0.00143188	0.000754384	0.00141122	0.00145841	0.00139432	0.0014449	0.00184764	0.00114498
100	7.811	262311	238.098	4-aminophenol	75.2	0.00171415	0.00210491	0.00240722	0.00272792	0.00318484	0.00311969	0.00102534	0.00143126	0.00126043	0.00145301	0.00188334	0.0010479	0.000825999	0.00111514	0.000981024	0.000771122	0.000609122	0.00075416	0.00105034	0.000748705	0.0010166	0.00032158	0.000433576	0.00183399	0.00168447	0.00201315	0.0014528	0.0019845	0.00127223	0.00316659	0.00130154	0.000927633	0.00115747	0.00276615	0.00106498	0.00115555	0.00317626	0.000699007	0.00355998	0.00287388	0.00157167	0.00147086	0.00116834	0.00183358
103	7.904	262316	131.1	2-hydroxybutyric acid	98.8	0.0218429	0.0220776	0.0222454	0.0223776	0.0227356	0.0227335	0.133273	0.0228126	0.0139799	0.0469607	0.0481792	0.0128667	0.0209446	0.0523558	0.0329043	0.0257452	0.0473472	0.0718277	0.0281837	0.0170992	0.0387365	0.0616897	0.0212255	0.0623541	0.072343	0.0240258	0.0346985	0.0343702	0.0360785	0.0279341	0.0301285	0.0275184	0.0216968	0.0222068	0.0313766	0.0187047	0.0306785	0.0173577	0.0365285	0.0263458	0.0229756	0.018043	0.0197395	0.013734
108	7.998	262322	147.1	Oxalic acid	91.4	0.00946898	0.0106137	0.0113438	0.0130891	0.0158375	0.0161654	0.0230633	0.0307445	0.0198975	0.0132559	0.0194426	0.0189234	0.0137111	0.0180112	0.0252459	0.0326105	0.0257604	0.0253212	0.0156295	0.0181245	0.0228235	0.0211697	0.0180487	0.0345555	0.0266729	0.0310798	0.021248	0.0279828	0.0210594	0.0212032	0.0404694	0.0244398	0.0256942	0.0233794	0.0194126	0.0201744	0.0188075	0.0255529	0.0223183	0.021953	0.0209866	0.0201997	0.027467	0.0231518
110	8.126	262329	156	Pipecolic acid	83.5	0.000161843	0.000171485	0.000144924	0.000202411	0.000206179	0.000210236	0.000193575	0.00020912	0.000186656	0.000189124	0.000190526	0.000177343	0.000360561	0.000175981	0.000166975	0.00014593	0.000179097	0.000203392	0.000255744	0.000290611	0.000178959	0.000147468	0.000239075	0.000344271	0.000182601	0.000229277	0.000163833	0.000217821	0.000186726	0.000164933	0.000209894	0.00016474	0.000132358	0.000135562	0.000186821	0.000149129	0.000154994	0.000158207	0.000167828	0.000145086	0.000172794	0.000164136	0.000235481	0.000181847
111	8.132	262330	152.051	3-pyridinol	93.4	0.00577926	0.005717	0.00597312	0.00605494	0.00629786	0.00625421	0.00647423	0.00734083	0.00626312	0.00616416	0.00635147	0.00580346	0.00617354	0.00589696	0.00598206	0.00638544	0.00611392	0.0069002	0.00648883	0.00648026	0.0061164	0.00569047	0.00597078	0.00737873	0.00585119	0.00668879	0.00599932	0.00660517	0.00625471	0.00601842	0.00726785	0.0061638	0.00642556	0.00592402	0.00618889	0.00597017	0.00609863	0.00675955	0.00636327	0.00619915	0.00602677	0.00647508	0.00612683	0.00663968
112	8.133	262330	100	Lactamide	72	0.0577794	0.058342	0.0587003	0.0594963	0.0608427	0.0610169	0.0741985	0.0660401	0.0779714	0.104806	0.0839875	0.0840933	0.0669755	0.000151139	0.0935914	0.0829941	0.0923632	0.0725617	0.102836	0.0758421	0.0842884	0.091222	0.0865127	0.0895862	0.0945859	0.071578	0.0769892	0.0704569	0.0739112	0.000111338	0.0760683	0.0701308	0.0760771	0.0729884	0.0795874	0.0716007	0.000127854	0.0577676	0.0689052	0.0774358	0.0633115	0.0697016	0.100259	0.081539
113	8.141	262330	99.1	Benzylalcohol	79.2	0.00245805	0.00185613	0.00283788	0.00246106	0.00275169	0.0031917	0.00215475	0.00192172	0.00169858	0.00180686	0.00223049	0.000563036	0.00190937	0.00117103	0.00157505	0.00179398	0.00238331	0.00344715	0.00177008	0.00153093	0.00270895	0.00380834	0.00105429	0.00195114	0.00193193	0.0032855	0.00147601	0.00261269	0.00251113	0.00148132	0.00270782	0.0019427	0.0014956	0.00307605	0.00347893	0.00254549	0.00180329	0.00133806	0.00138541	0.00277462	0.00294795	0.00199848	0.000531914	0.00221863
115	8.199	262334	147.1	3-hydroxypropionic acid	93.6	0.00260446	0.00264461	0.00307766	0.00418001	0.00492923	0.0036107	0.732528	0.00478324	0.778639	1.00662	0.83259	0.833456	0.00400182	0.767249	0.912842	0.821396	0.906426	0.733823	0.993092	0.766107	0.833822	0.891922	0.0230007	0.882776	0.920288	0.730832	0.00283398	0.00638557	0.00375865	0.00245369	0.771344	0.00289439	0.00315216	0.729391	0.00357378	0.0035433	0.641773	0.00341102	0.00317036	0.774634	0.00398232	0.00352495	0.971249	0.816058
117	8.245	262336	156.1	Piperidone	90.7	0.000487548	0.00051512	0.000506546	0.000537229	0.000515488	0.000525631	0.000277229	0.000368918	0.000349654	0.000636428	0.000241325	0.000919485	0.000292295	0.000106287	0.000142256	0.0017057	0.000100636	0.00015017	0.000480276	0.00186253	0.000194155	0.000689387	0.000130037	0.00226086	0.000455219	0.000226972	0.000471002	0.00627834	0.000376952	0.00034215	0.000433096	0.000744623	0.000787398	0.00100886	0.000242045	0.000957374	0.0001689	0.000139604	0.000276916	0.000147122	0.000450279	0.000579039	0.000817041	0.000543281
119	8.354	262343	117.033	Isopropyl alcohol	83	0.00424809	0.00309067	0.00307551	0.00250021	0.00221955	0.00229527	0.00685576	0.00701999	0.00565916	0.0049079	0.00430245	0.0047188	0.00197395	0.00482985	0.00347062	0.0033583	0.00440087	0.00379155	0.00402977	0.000831457	0.00267753	0.00372775	0.00493731	2.82988e-05	0.00557884	0.0035419	0.00318677	0.00324014	0.00181829	0.00275438	0.00287665	0.00160222	0.00213297	0.00243711	0.00246673	0.00238523	0.00173278	0.00187754	0.00199311	0.00193622	0.00156185	0.00210407	0.00275145	0.00354297
121	8.401	262345	165.091	P-cresol	97.1	0.00177574	0.0018196	0.00186716	0.00187254	0.00200974	0.00201705	0.00390185	0.000546643	0.00232886	0.000524722	0.000341648	0.00631945	0.017491	0.000601703	0.00491789	0.0027392	0.00310643	0.00617612	0.00184241	0.00324889	0.00122919	0.000605135	0.00433642	0.00240517	0.0013841	0.00040437	0.00298318	0.00568322	0.00021436	0.00339179	0.00239927	0.000270564	0.00136681	0.000279916	0.00265269	0.00344473	0.00295504	0.00211421	0.000569933	0.00195644	0.000674208	0.000224688	0.000384247	0.00187763
125	8.467	262349	147.1	(r)-3-hydroxybutyric acid	99.4	0.0506204	0.0511996	0.0515573	0.0515458	0.0528664	0.0529131	0.656615	0.022997	0.0123369	0.121027	0.0596944	0.0217185	0.0275483	0.0314805	0.154895	0.0195664	0.28482	0.0516231	0.0190565	0.0231803	0.0334827	0.0233667	0.0130768	0.0403206	0.280837	0.0259707	0.0694902	0.0447652	0.0339201	0.0292517	0.0276238	0.0192511	0.0193384	0.0342618	0.0373891	0.0153461	0.0348679	0.020606	0.0355829	0.0212899	0.0199188	0.0305056	0.0170782	0.0175493
126	8.513	262352	145.1	2-hydroxy-3-methylbutyric acid	95.8	0.00581701	0.00589138	0.00603768	0.00609333	0.00615617	0.00617787	0.00760391	0.00616449	0.0053233	0.0107556	0.0224464	0.0101641	0.00859973	0.0568977	0.00134438	0.0156087	0.0160167	0.0074575	0.00526133	0.00330533	0.00394765	0.0439849	0.0170402	0.00651771	0.003812	0.00815651	0.00622561	0.00643287	0.012363	0.00442295	0.0117204	0.00692014	0.00807933	0.00343394	0.00899156	0.00331941	0.00607524	0.00296384	0.00522194	0.00625674	0.00884699	0.011761	0.00774711	0.00396616
130	8.627	262359	282.1	Urocanic acid	70.7	0.0021662	0.00217366	0.00214936	0.00195925	0.00198454	0.00192505	0.00126326	0.00141752	0.0013387	0.0011842	0.00122252	0.00152514	0.00277634	0.00237811	0.00165829	0.00163751	0.00193686	0.00213371	0.00147579	0.0019974	0.00171149	0.00182546	0.00202167	0.00129501	0.000960026	0.00155322	0.00208479	0.00202858	0.00188869	0.00144728	0.00161206	0.00202872	0.00180173	0.00186551	0.00159076	0.00209292	0.00190123	0.00216978	0.00197941	0.00206976	0.00157984	0.00212044	0.000950815	0.00134006
132	8.658	262360	117	Caprylic acid	83.3	0.00056681	0.000549118	0.000596373	0.000552689	0.000573558	0.000608629	0.00118678	0.000403011	0.00120166	0.000255868	0.000256813	0.000160192	0.000485068	0.000283945	0.00025936	0.000476053	0.00027232	0.00089111	7.44872e-05	0.000636155	0.000236111	0.000244028	0.000314411	0.00065887	0.000221343	0.000426877	0.000363502	0.000226867	0.000316425	0.00025702	0.000412463	0.000351107	0.000313473	0.000233815	0.00040721	0.000398171	0.000334241	0.000381269	0.000306652	0.00026846	0.000313005	0.000376893	0.000321832	0.000352803
133	8.668	262361	130.1	2-aminoisobutyric acid	95.5	0.012697	0.0127544	0.012975	0.0130934	0.0133205	0.0131599	0.0197051	0.0135723	0.0102136	0.00849277	0.0118247	0.00491335	0.0155921	0.00496374	0.00465432	0.00853281	0.0113213	0.0247934	0.00866667	0.0115151	0.00936047	0.0183179	0.00529909	0.0191316	0.0107607	0.0162339	0.0140206	0.0174232	0.0193274	0.0182096	0.0183034	0.0134363	0.0102793	0.0124	0.0115498	0.00915346	0.0121536	0.0106667	0.0141806	0.00912155	0.0195296	0.0103421	0.013589	0.00849809
135	8.745	262365	133	L-leucine	76	0.00118204	0.00167016	0.00125588	0.00133897	0.00130824	0.00129006	0.00127896	0.00108095	0.00140485	0.000949989	0.00164055	0.00184226	0.00144667	0.00127349	0.00134081	0.00149013	0.00140665	0.00146988	0.0015851	0.00216245	0.0018613	0.00143868	0.00141959	0.00194145	0.00176939	0.00165226	0.00138441	0.00163543	0.00148895	0.00119535	0.001386	0.00148907	0.00157633	0.00140298	0.0012772	0.00115615	0.0013726	0.00142391	0.000816398	0.00134261	0.00153846	0.00122871	0.00116068	0.00192367
136	8.746	262366	241.1	Methanephosphonothioic acid	83.2	0.00514096	0.00858	0.00527468	0.0058327	0.00545404	0.00521181	0.00585803	0.00396437	0.00759271	0.00433134	0.00880633	0.0107214	0.00631054	0.00623732	0.00712915	0.00794349	0.00674064	0.00684174	0.00751602	0.0117043	0.0100439	0.00735827	0.00725684	0.0103192	0.00938968	0.00746932	0.00591767	0.0076751	0.0069658	0.00552563	0.00646665	0.00728092	0.0075692	0.00640945	0.00601136	0.00513032	0.00626797	0.00737695	0.00646645	0.0059477	0.00772804	0.00549405	0.00545077	0.0102708
138	8.783	262368	98.1	N-methylglutamic acid	72.7	0.000474054	0.000334811	0.000330311	0.000262328	0.000189663	0.000200295	0.000530994	0.000228271	0.000805806	0.000292997	0.000836898	0.0026874	0.000595765	0.00126776	0.000371195	0.000608551	0.000495053	0.000715768	0.000975715	0.000756225	0.000769147	0.000564734	0.000394737	0.000832024	0.000222157	0.00139782	0.000266199	0.00029827	0.000366867	0.000223708	0.000522275	0.000654297	0.000571745	0.000985535	0.000261047	0.000474203	0.00017797	0.0003106	0.000303303	0.000478591	0.00035702	0.000454894	0.000444531	0.000711651
144	8.883	262374	151.067	Phenol	89.4	0.000416493	0.000370085	0.000330475	0.000370091	0.000334119	0.000437211	0.000497217	0.000431469	0.000555636	0.00069096	0.000530981	0.000584153	0.000462333	0.000302948	0.000490171	0.000502697	0.000516931	0.0004142	0.00063243	0.000559928	0.000502175	0.000441058	0.00048132	0.000641207	0.000616739	0.000393456	0.000426355	0.000477915	0.000414431	0.000343093	0.000495981	0.000435819	0.000434032	0.000396172	0.000430174	0.000434764	0.000331273	0.000351493	0.000426772	0.000339815	0.000312572	0.000398356	0.000682491	0.00049548
146	8.919	262376	169	Allantoin	71	0.000378719	0.000409716	0.00043018	0.000424946	0.000376543	0.000402456	0.000354946	0.000407175	0.000385843	0.000314774	0.000364978	0.000310933	0.000414382	0.000367247	0.000342311	0.000383357	0.00036823	0.000416775	0.00041217	0.000424119	0.000373744	0.00036153	0.000383452	0.000538568	0.000351815	0.000413086	0.000410609	0.000377291	0.00040074	0.000334544	0.000417593	0.000425262	0.000390491	0.00037819	0.000451668	0.000435866	0.000405328	0.000423517	0.000393196	0.000404884	0.00040295	0.000392044	0.00027725	0.000400585
151	9.046	262383	116.1	L-alanine-alanine	85.8	0.0190218	0.00946159	0.00954606	0.00955508	0.00935827	0.009327	0.00759589	0.00841005	0.00830694	0.00771978	0.00752822	0.00649134	0.0100458	0.00814762	0.0075912	0.00855846	0.00820755	0.00908722	0.00862655	0.00950565	0.00867445	0.00810558	0.00834422	0.00873198	0.0142494	0.00841143	0.00920806	0.00837307	0.00969341	0.00762031	0.00861557	0.00945205	0.00938264	0.0167819	0.00903006	0.0188838	0.00855368	0.00995297	0.00899587	0.00918794	0.0087287	0.00921683	0.00669143	0.00848167
156	9.14	262389	200.1	3-methyl-2-oxovaleric acid	96.1	0.000451711	0.000476648	0.000468979	0.000481687	0.00049842	0.000510186	0.000791736	0.000436264	0.000556849	0.000516769	0.00149229	0.000948506	0.000418665	0.000419821	0.000652833	0.000498658	0.000399147	0.000717405	0.000742306	0.00052337	0.000390429	0.000488135	0.000300239	0.000662013	0.000616173	0.00139208	0.000430498	0.000780605	0.000426273	0.000629312	0.00059336	0.00052304	0.000495065	0.000190189	0.000332047	0.00032622	0.000467703	0.000211171	0.000430557	0.000290986	0.000527655	0.000555958	0.00128883	0.000357736
158	9.179	262391	88.0636	2-hydroxyhippuric acid	72.6	0.00122546	0.00121	0.00131697	0.00116779	0.00132891	0.00130667	0.00117496	0.00116507	0.00121777	0.00110255	0.00124041	0.00124566	0.0012248	0.00125431	0.00121051	0.00130619	0.001233	0.00125628	0.00121085	0.00122878	0.00122647	0.00115667	0.00119552	0.00124661	0.00132133	0.00130602	0.00125943	0.00125246	0.00123765	0.00129437	0.00126374	0.00126582	0.00121797	0.00124883	0.00117734	0.0012454	0.0012093	0.0012171	0.00122391	0.00125505	0.0012463	0.0012967	0.00129223	0.00118985
160	9.228	262394	147.1	4-hydroxybutyric acid	94.6	0.00291692	0.00288021	0.00291108	0.00277082	0.002737	0.00291291	0.00366644	0.00476608	0.00319597	0.0035957	0.00281979	0.00373167	0.00387615	0.00341424	0.0033502	0.00426269	0.0041724	0.00420167	0.00324701	0.00444501	0.00351174	0.00361196	0.00342668	0.00433835	0.00311584	0.00302362	0.00306726	0.00305402	0.00357779	0.00248476	0.00391035	0.0038249	0.00331212	0.00279228	0.00308643	0.00319324	0.00237087	0.00413355	0.0025181	0.00280125	0.00301297	0.00329212	0.00317419	0.00315938
161	9.252	262395	219.05	Cis-caffeic acid	75.2	0.000962553	0.000931519	0.000933044	0.000943711	0.000961565	0.000952585	0.000995031	0.00105858	0.00105481	0.000976773	0.000992251	0.000866078	0.00104214	0.000929067	0.000955986	0.000854187	0.000834815	0.000938106	0.00102531	0.00101098	0.000908011	0.000882916	0.000813252	0.000928224	0.000680615	0.000792847	0.00077487	0.000867332	0.000730125	0.000778523	0.00078859	0.000689175	0.000744303	0.000759595	0.000710107	0.000755939	0.000804609	0.000755021	0.000823866	0.000935271	0.00085631	0.0006862	0.000752361	0.000887231
165	9.331	262400	247.2	3-hydroxyisovaleric acid	92.5	0.000207161	0.000212438	0.000222161	0.00023005	0.000228326	0.000241582	0.000731491	0.000399588	0.000179334	0.000260641	0.000328345	0.000292633	0.000338531	0.000373103	0.000291831	0.000308458	0.000357701	0.00064992	0.000332096	0.000413326	0.000180489	0.000927731	0.000316085	0.000540339	0.000203445	0.000394681	0.000285737	0.000334447	0.00025199	0.000208458	0.000305164	0.000221984	0.000238581	0.000166451	0.000239977	0.000243689	0.000225227	0.000165753	0.000240733	0.000202954	0.00024183	0.000202639	0.000188937	0.000347867
168	9.396	262403	200.1	2-ketoisocaproic acid	99.4	0.0021108	0.00208357	0.00214158	0.00213836	0.00223712	0.00218929	0.00347739	0.00185469	0.00196963	0.00225116	0.00596107	0.00210972	0.000893529	0.0024535	0.0018184	0.00251817	0.00189471	0.00282869	0.0025586	0.0021591	0.00173781	0.00234193	0.000828703	0.00148043	0.0029364	0.00679684	0.00126246	0.00271442	0.00191096	0.0032656	0.0023673	0.00252642	0.00255122	0.0010391	0.00131263	0.00147676	0.00219834	0.000921867	0.00231928	0.00152593	0.002643	0.00280093	0.0039121	0.00144049
172	9.453	262407	162.086	Benzylamine	68	0.000156306	0.000163437	0.000139235	0.000156473	0.000169021	0.000163213	0.000143877	0.0012139	0.00079689	0.000446002	0.000137168	6.95055e-05	0.00043703	0.00030622	0.000283858	0.000282422	0.00111094	0.00120002	0.000676137	0.000815393	0.00017775	0.000210759	0.00030703	0.000315364	0.000288035	0.000651644	0.000182325	0.0002679	0.00014145	8.63918e-05	0.000269673	0.000315186	0.000219927	0.000218773	0.000190777	0.000220313	0.000249988	0.000188756	0.000202552	0.000246547	0.00131176	0.000229459	0.000137546	0.000385167
174	9.515	262410	117	2-hexanol	82.7	0.000370752	0.000603498	0.000763939	0.000898289	0.000991836	0.000983182	0.000267698	0.000497123	0.000314312	0.000695505	0.00110773	0.000614103	0.00133162	0.000934705	0.00122393	0.00128024	0.00140458	0.0023291	0.000867982	0.00103966	0.00149113	0.00240473	0.00133873	0.00288838	0.00153162	0.00214714	0.000847645	0.00143799	0.000891286	0.00211469	0.00162892	0.000847124	0.0010015	0.00115163	0.0012942	0.00129236	0.00108411	0.00118727	0.00139573	0.0013664	0.00151149	0.000999555	0.00341532	0.00155806
177	9.615	262416	181.073	2,6-diaminopimelic acid	66.5	0.000201151	0.000172816	0.000159145	0.000158936	0.000147023	0.000154978	2.20722e-05	0.000179978	0.000146358	0.000169147	0.000172084	0.00019251	0.000156002	0.000173573	0.00016824	0.000173306	0.000173927	0.000164205	0.000204485	0.00019887	0.000185983	0.000176605	0.000149273	0.000192283	0.000162632	0.000172898	0.00015386	0.000202156	0.000154514	0.000148701	0.000155432	0.000150516	0.000160025	0.000142658	0.000141669	0.000164625	0.000146813	0.00016724	0.000152128	0.000167444	0.000167734	0.000210429	0.000165621	0.000175761
188	9.914	323134	117.1	Propyl alcohol	82.5	0.00666686	0.00792802	0.00656018	0.00782492	0.00761063	0.00762295	0.00822032	0.015232	0.0143481	0.00958113	0.0107701	0.00887644	0.00856491	0.00938167	0.0072799	0.00965898	0.0118194	0.0101998	0.00773929	0.014737	0.0113679	0.0092532	0.0109675	0.0142863	0.0063931	0.0151316	0.0109742	0.0113197	0.00545519	0.00826812	0.00873854	0.00440923	0.00510219	0.00967124	0.0076408	0.00952909	0.00763912	0.0127766	0.0071522	0.00676495	0.0215772	0.00904693	0.0152436	0.010266
193	10.047	323142	147.1	Urea	98.2	1.23242	1.24816	1.2671	1.28012	1.30471	1.31319	1.94654	0.0062599	1.39616	1.38414	0.236769	0.232543	0.00265666	1.61055	1.69099	1.92816	1.50441	0.0142362	0.248771	0.18266	1.16614	2.06725	1.71437	0.0381021	1.4652	0.196065	0.195984	0.188118	0.236878	1.61735	2.15194	1.48371	1.4228	1.56932	1.27173	1.43426	0.946592	1.28913	1.60162	1.8241	1.8062	1.56705	1.28605	1.54041
203	10.288	323156	174.1	Ethanolamine	96.8	0.00456735	0.0047866	0.00493318	0.00510439	0.00519888	0.00519278	0.00329897	0.00439038	0.00393194	0.00316179	0.0038047	0.00259028	0.00397512	0.00174884	0.00172857	0.00273195	0.00268208	0.00314631	0.00333451	0.00418763	0.00183308	0.00232982	0.00373611	0.00482505	0.00271257	0.00494512	0.00255231	0.00341387	0.00207794	0.00409508	0.00378226	0.00228916	0.00199589	0.00175349	0.00283118	0.0024124	0.00398669	0.00274844	0.00254453	0.00225782	0.0067122	0.00286704	0.00556465	0.00360584
204	10.305	323157	201.1	Octanoate radical	95.6	0.00754363	0.00780235	0.00776967	0.0078442	0.00797442	0.00798528	0.00649728	0.00669977	0.00714219	0.00703091	0.00711985	0.0211681	0.00681822	0.0078657	0.00727932	0.0076017	0.00708442	0.0066093	0.00718955	0.00670017	0.00734229	0.00707364	0.00709911	0.00691402	0.0068789	0.00735721	0.00744721	0.00740004	0.00730271	0.00702795	0.00731721	0.00741579	0.00742839	0.00735345	0.00718995	0.00722303	0.00735196	0.00748756	0.00718264	0.00819819	0.00730168	0.00758099	0.00750287	0.00729174
205	10.315	323157	130.1	N-methylalanine	89.1	0.0480477	0.0502851	0.0494714	0.0509445	0.0517597	0.0516019	0.0369753	0.0389617	0.0419009	0.0414776	0.0433788	0.038027	0.0467532	0.0466078	0.0455674	0.0467899	0.0462704	0.043206	0.0468001	0.0453355	0.0486847	0.0442053	0.0468184	0.0445122	0.0406205	0.0472502	0.0476528	0.0480208	0.0502205	0.0440024	0.049407	0.0492082	0.050932	0.048183	0.0492698	0.0488805	0.0493346	0.050154	0.0496008	0.0499348	0.0469222	0.0502898	0.0382831	0.0490577
208	10.4	323162	147.1	Glycerol	95.3	0.061045	0.0614727	0.0616871	0.0620375	0.0631249	0.0628293	0.122077	0.09608	0.0836299	0.11164	0.103645	0.100336	0.101631	0.0836862	0.0944084	0.0687183	0.104391	0.0245839	0.0816915	0.0975196	0.0848631	0.0662604	0.067788	0.0639187	0.138503	0.120664	0.0738536	0.0784609	0.0784873	0.0789016	0.0778979	0.0839859	0.0735319	0.0760055	0.0891415	0.0562891	0.0862164	0.0758381	0.0926827	0.0903295	0.0783535	0.0643044	0.0800552	0.0641867
209	10.404	323163	299.1	Ciliatine	95.1	0.735383	0.734621	0.738212	0.734759	0.73849	0.737789	1.20972	1.32111	1.19138	0.924598	0.945721	1.14314	1.45996	0.966852	1.04301	0.807704	1.02444	1.01728	1.02455	1.5007	0.958738	0.798853	1.09713	1.30954	1.00525	1.25992	1.04308	1.20919	0.99843	0.790535	0.9408	1.10602	0.991714	0.899025	0.929643	0.765227	0.825097	0.833834	0.948545	0.843197	0.968204	0.825193	0.988241	0.929234
213	10.537	323170	225.986	Citraconic acid	77.5	0.000121563	0.000118839	0.000113204	0.000113307	0.000128386	0.000131147	0.000127173	0.000131308	0.000163768	9.58693e-05	5.31761e-05	0.000229648	0.000575598	9.48817e-05	0.000125442	0.000107313	9.77745e-05	0.000186033	9.11527e-05	0.00026733	8.87521e-05	5.55332e-05	0.000211807	0.000125351	0.000107481	9.04739e-05	0.000117506	0.000162384	0.000107183	7.88867e-05	0.000122484	0.000117742	0.00010839	6.49527e-05	0.000182151	0.000113385	9.58258e-05	9.15563e-05	7.03083e-05	8.84984e-05	7.60196e-05	9.37099e-05	9.40165e-05	7.42232e-05
215	10.565	323172	221.033	Dihydroxymalonic acid	76.6	5.60856e-05	6.23686e-05	8.83881e-05	4.80274e-05	2.722e-05	2.93739e-05	4.98542e-05	6.39327e-05	0.000107426	0.00014416	7.70024e-05	0.000100279	5.61183e-05	4.99841e-05	6.90077e-05	0.000121501	9.77265e-05	6.51725e-05	9.25244e-05	6.29813e-05	4.58333e-05	0.000130376	5.62648e-05	7.36465e-05	8.85999e-05	4.25476e-05	7.14658e-05	8.00871e-05	5.75043e-05	7.03274e-05	7.45983e-05	5.59701e-05	5.90991e-05	4.46896e-05	3.62004e-05	6.08219e-05	6.42784e-05	4.41223e-05	0.000158643	9.38464e-05	3.59367e-05	7.27364e-05	7.50789e-05	0.000120053
216	10.631	323176	181	O-propyl isopropylphosphonate	71.8	0.00242895	0.00547809	0.00393665	0.00496873	0.00461183	0.00444561	0.00082741	0.00112297	0.00188502	0.00192009	0.00360373	0.00377704	0.00306548	0.00336201	0.00409624	0.00435776	0.00387732	0.00404684	0.00488213	0.00659023	0.00618085	0.00489119	0.0051068	0.00556531	0.00594338	0.0052349	0.00426043	0.00521152	0.00543897	0.00475406	0.00559717	0.00544462	0.00586487	0.00525489	0.00528445	0.00460015	0.00512532	0.00558819	0.00518937	0.00499685	0.00541427	0.00459807	0.00541369	0.00663048
217	10.671	323178	141.095	3,6-anhydro-d-galactose	83.5	0.00200257	0.0021326	0.00204691	0.00212652	0.00215564	0.00218607	0.00197406	0.00230017	0.00209507	0.00204063	0.00228848	0.00216602	0.0023139	0.00207221	0.0020745	0.00212174	0.00199837	0.00213823	0.00222411	0.00226335	0.00217761	0.00209067	0.00213643	0.00223268	0.00199623	0.00218943	0.00195225	0.00219812	0.00216549	0.00193753	0.0022485	0.00198837	0.00215777	0.00197508	0.00207779	0.00199312	0.00202257	0.00215118	0.00210582	0.00215929	0.00222169	0.0021493	0.00213743	0.00224574
218	10.706	323180	183	2-deoxyerythritol	79.6	0.000436277	0.000439588	0.00043456	0.0004436	0.000447393	0.000440693	0.000255899	0.000358473	0.000350941	0.000354477	0.000391497	0.000368141	0.000431966	0.000399877	0.000386055	0.000428852	0.000410127	0.000426516	0.000432163	0.000455625	0.00049918	0.000403984	0.000412097	0.000415995	0.000348479	0.000405934	0.000399059	0.000443738	0.000441864	0.000386075	0.000428688	0.000445892	0.000429686	0.000436754	0.000435967	0.000415365	0.000490343	0.000459221	0.000426955	0.00045413	0.000426062	0.000431276	0.000330017	0.000448226
219	10.72	323181	112.1	4-methyl-5-thiazoleethanol	67	0.000689674	0.000795777	0.000797034	0.000808096	0.000864067	0.000834553	0.000454515	0.000656507	0.00060905	0.00066027	0.000705297	0.000643935	0.000812091	0.000655836	0.000664084	0.000836406	0.000675171	0.000840319	0.00077769	0.000831865	0.000695571	0.00075672	0.00070374	0.000941912	0.000660132	0.000784464	0.000718171	0.000740137	0.000760193	0.000668008	0.000819177	0.000749489	0.000747842	0.000729177	0.00075464	0.000789694	0.000756644	0.000739264	0.000789776	0.000769293	0.000842015	0.000820366	0.000650904	0.000801358
220	10.733	323182	158.1	L-isoleucine	96.6	0.0552369	0.0561603	0.0569988	0.0577671	0.0581283	0.0575552	0.0644334	0.00263788	0.052824	0.0552785	0.0713524	0.0456654	0.0901381	0.0183346	0.0462943	0.0834353	0.0375667	0.0719689	0.0582862	0.0725902	0.0330042	0.0607174	0.0314472	0.127707	0.050965	0.0685807	0.0381593	0.0435037	0.0505986	0.0496216	0.0641231	0.0529256	0.0352092	0.0219394	0.0390811	0.0397703	0.0377676	0.00131285	0.00124256	0.0318224	0.0869271	0.0016774	0.0656158	0.0460843
223	10.831	323188	142.1	L-proline	95.8	0.141595	0.141328	0.141544	0.141589	0.140504	0.140213	0.0709226	0.229572	0.126387	0.0698381	0.0956909	0.07507	0.295165	0.0484823	0.0309011	0.183028	0.0689143	0.228169	0.128402	0.145284	0.0589825	0.107953	0.0985409	0.269908	0.0410556	0.0956072	0.0871419	0.0839111	0.164251	0.0686922	0.116046	0.0892376	0.0657191	0.0605853	0.0866346	0.0743934	0.0745021	0.179024	0.073527	0.0602722	0.201619	0.0705053	0.259082	0.0770033
227	10.956	323195	147.1	Maleic acid	91.9	0.0234825	0.0246892	0.0258214	0.0264873	0.0268196	0.0269803	0.0113164	0.0272838	0.0390486	0.00871529	0.00958643	0.0139565	0.0342749	0.00383159	0.00715285	0.0117666	0.00697349	0.0215985	0.0148161	0.022726	0.00783545	0.00937274	0.0100173	0.0207825	0.00770762	0.0211762	0.0117234	0.019658	0.00918653	0.0159954	0.0179643	0.0105566	0.0124321	0.00797975	0.00945053	0.00883966	0.0147347	0.0115366	0.00746789	0.00785286	0.0308098	0.0115541	0.0265577	0.0159629
228	10.96	323195	174.1	Glycine	99.4	0.104374	0.110181	0.115232	0.117325	0.12016	0.119324	0.0470394	0.120305	0.174784	0.0365269	0.0418323	0.0606095	0.150066	0.014153	0.0284801	0.0498294	0.027316	0.0963822	0.0652351	0.102601	0.0329101	0.0404413	0.0409755	0.0915046	0.03127	0.0928006	0.049507	0.0858336	0.0370268	0.0706388	0.0792203	0.0441035	0.0523556	0.0340627	0.0389018	0.0380015	0.0641343	0.0496042	0.0304552	0.0318772	0.136739	0.0495748	0.120391	0.0705491
232	11.101	323203	240.093	Pyrrole-2-carboxylic acid	81.5	0.00055142	0.000601495	0.000632582	0.000648311	0.000645533	0.000656411	0.000764462	0.000896705	0.000726219	0.000835425	0.000740814	0.000778402	0.000767704	0.000682764	0.000748965	0.000901477	0.000864958	0.000846988	0.000794328	0.000807258	0.000745141	0.000778169	0.000753613	0.000947386	0.000748612	0.000883653	0.000730826	0.000848904	0.000758569	0.000668018	0.00103173	0.00075272	0.000745724	0.000642774	0.000757744	0.00075368	0.000657462	0.000765638	0.000719191	0.000705979	0.00075014	0.00080714	0.000903402	0.000840436
233	11.142	323206	147.1	Butanedioic acid	95	0.00590321	0.00606383	0.00659535	0.00646492	0.00681386	0.0068481	0.012977	0.0160254	0.0086068	0.00929752	0.00573301	0.00424343	0.0296413	0.00496269	0.00675837	0.00603736	0.0120925	0.00691322	0.00694339	0.0111343	0.00526017	0.00764146	0.0102879	0.0345864	0.00625355	0.0144813	0.011599	0.0124097	0.00552598	0.00656981	0.00903859	0.0100594	0.0091873	0.00527239	0.00495611	0.00574164	0.00586995	0.0088256	0.00691106	0.0049465	0.00734345	0.00534493	0.0103221	0.00815645
235	11.173	323208	190.1	(-)-catechin	70.7	6.89435e-05	0.000220247	6.33742e-05	6.40932e-05	0.000245862	0.000215833	0.000288954	0.000232462	0.0002351	0.00038912	0.000357366	0.000312901	0.000167856	0.000301607	0.000272511	0.000208456	0.000277939	0.000630462	0.00034402	0.000176222	0.000230653	0.000162234	0.000228382	0.000291424	0.000358997	0.000305456	0.00012949	0.000118096	6.58658e-05	0.000237012	0.00019356	0.000121882	0.000155682	0.000329285	0.000121151	0.000103355	0.000116138	0.000230618	0.000110197	0.000112429	0.000196049	0.000146576	0.000422413	0.000128704
237	11.217	323210	155.1	N-acetylglutamate	73.4	0.000114797	8.22649e-05	0.000110125	0.000114659	7.35487e-05	7.74691e-05	0.000121975	0.000152144	8.26569e-05	4.8338e-05	0.000100616	7.79403e-05	7.65817e-05	3.90635e-05	6.27071e-05	0.000131135	0.000167329	0.000141074	0.000107259	0.000163566	0.000159456	0.000118613	0.000125426	0.000165468	6.68516e-05	0.000105667	4.88737e-05	0.0001219	7.75644e-05	0.000162244	0.000184928	0.000137409	0.000138496	9.79616e-05	0.000145877	3.92566e-05	0.000174302	0.000171596	6.73697e-05	5.26309e-05	0.000102082	0.000171822	2.97483e-05	0.000112097
243	11.351	323218	189.098	Glyceric acid	93.8	0.0018094	0.00184777	0.00186215	0.00185774	0.00195054	0.00187974	0.00295981	0.00333429	0.00359	0.00254077	0.00339428	0.00461512	0.00263054	0.00561897	0.0106878	0.00396972	0.00311599	0.00253322	0.00466977	0.00328723	0.00851656	0.00302789	0.00329224	0.00376945	0.00396285	0.00469149	0.00236632	0.00345537	0.00271374	0.00175685	0.00379807	0.00239124	0.00475818	0.00217874	0.00181844	0.00208396	0.00139816	0.00166703	0.00278009	0.00190526	0.00167949	0.00143652	0.0031286	0.00278473
246	11.428	381021	141.1	Pentobarbital	82.6	0.000575033	0.000566094	0.000557478	0.000555419	0.000566132	0.000569496	0.000591303	0.000646968	0.000619929	0.000599966	0.000602378	0.00058682	0.000610182	0.000585719	0.000594553	0.000562184	0.000534354	0.000580272	0.000566768	0.000649968	0.000584068	0.000583512	0.000607912	0.000602079	0.000530421	0.000576258	0.000513081	0.000634876	0.000561161	0.000569744	0.000569684	0.000557569	0.000570806	0.000531212	0.000557083	0.000554805	0.000585586	0.000539567	0.000560201	0.000545245	0.000587223	0.000596541	0.000543635	0.000596841
248	11.501	381024	241.1	Uracil	98.5	0.000129791	0.000123057	0.000127417	0.000138212	0.000142388	0.000137093	0.000262166	0.000490759	0.000111386	8.22799e-05	8.6708e-05	6.96239e-05	0.000839831	8.11717e-05	8.41525e-05	6.69558e-05	0.000101631	0.000121593	0.000100328	0.000330309	5.92326e-05	6.31748e-05	9.39401e-05	0.000633447	9.64717e-05	0.000388766	0.0002815	0.000359345	0.000103724	6.89322e-05	0.000107638	9.03699e-05	0.000116792	7.17146e-05	7.28827e-05	6.90096e-05	5.05906e-05	8.34836e-05	9.2356e-05	6.48476e-05	7.53234e-05	8.90725e-05	0.000102765	8.59e-05
254	11.652	381028	174.1	5-methoxytryptamine	90.2	0.000834591	0.000855101	0.000879706	0.000846607	0.00088034	0.000875006	0.000853477	0.000891924	0.000855606	0.000801709	0.000913298	0.000809078	0.00104406	0.00073654	0.00068802	0.000840597	0.00091573	0.000805717	0.000776246	0.00110103	0.000943928	0.000703382	0.000827133	0.00087276	0.000725892	0.0010233	0.000611856	0.000940692	0.000918685	0.000717689	0.000909606	0.000730233	0.000674196	0.000640119	0.00073557	0.000872927	0.000716594	0.000645652	0.000815017	0.000671725	0.00102986	0.000713187	0.000925891	0.000866726
255	11.676	381029	239.1	1,2,4-benzenetriol	84	0.00681774	0.00662012	0.00681144	0.00647184	0.00677937	0.00664284	0.00910593	0.00975715	0.00869451	0.00835459	0.00895966	0.00856496	0.00853267	0.00775162	0.00785602	0.00737941	0.00760929	0.00750805	0.00839027	0.00862098	0.00753887	0.00714521	0.00799973	0.00843221	0.00802237	0.00804738	0.00630788	0.00760063	0.00619081	0.00678569	0.00728227	0.0059362	0.00637971	0.00594934	0.00631624	0.00598807	0.0057096	0.00550026	0.00643751	0.0061929	0.00719395	0.00618162	0.0078428	0.0079614
256	11.698	381030	292.114	4-deoxyerythronic acid	98.8	0.000426606	0.000425069	0.00045086	0.000452239	0.000477197	0.000482407	0.00179464	0.00112195	0.000280996	0.000321043	0.000783071	0.000736323	0.000948921	0.000749715	0.000433744	0.000657219	0.000957014	0.00164197	0.000776072	0.00123301	0.000386506	0.00135633	0.00123226	0.000608616	0.000431258	0.0011533	0.000397208	0.00062942	0.000685953	0.000443296	0.000919207	0.000876574	0.000440315	0.00043361	0.000333893	0.000380449	0.000232924	0.000506974	0.000601488	0.000261741	0.0011002	0.000622762	0.000324887	0.000505575
258	11.741	381031	245.1	Fumaric acid	96	0.00265521	0.00283268	0.00287781	0.00290798	0.00308747	0.00299653	0.00204873	0.00469672	0.00162809	0.00192788	0.00173777	0.00104313	0.0023175	0.00151763	0.00193357	0.00236199	0.00364235	0.0039101	0.00183143	0.00308665	0.00199853	0.00185612	0.00261166	0.0053795	0.00219035	0.00457855	0.00441082	0.00398917	0.00444987	0.00284313	0.00345773	0.00402524	0.00355679	0.003653	0.00313519	0.00292255	0.00343567	0.00359787	0.00502142	0.00435953	0.00284339	0.00301108	0.00149001	0.00262798
259	11.818	381034	340.102	Erythrose	74.7	0.000741676	0.000956391	0.000932434	0.000973884	0.00107067	0.00101488	0.000565772	0.000810315	0.000842112	0.000549017	0.000519187	0.000601723	0.00104305	0.000645643	0.000535573	0.000715689	0.00414137	0.000652609	0.001254	0.00127193	0.000703697	0.000505819	0.00133502	0.0015152	0.00395649	0.00108395	0.000751097	0.00113415	0.000852751	0.000680052	0.000750788	0.000759845	0.000641121	0.000747393	0.000559681	0.000603468	0.000807004	0.000688334	0.000875764	0.000965944	0.00159164	0.000464101	0.000714931	0.00104321
262	11.848	381035	204.1	Serine	96	0.0513742	0.0525791	0.0532133	0.0544127	0.0554688	0.0554199	0.0387756	0.0620377	0.0701785	0.0389418	0.0299564	0.0283205	0.0715097	0.0134326	0.0221476	0.0452196	0.0324391	0.0574582	0.0534438	0.039885	0.0292409	0.0282569	0.0275459	0.0723314	0.0295609	0.0808267	0.0501842	0.0640502	0.044847	0.0586898	0.0509906	0.0477603	0.0342272	0.037303	0.033601	0.0327622	0.0465973	0.0421374	0.0332908	0.0328381	0.0661542	0.0461302	0.0834863	0.0446207
263	11.919	381037	174.1	Pelargonic acid	93.4	0.00249549	0.00254721	0.00259338	0.00270976	0.00276289	0.00273554	0.00272445	0.00302448	0.00306944	0.00292032	0.00291396	0.00278192	0.00343847	0.00256646	0.00247613	0.00296763	0.00293968	0.0029205	0.00270708	0.00370388	0.00310915	0.00235464	0.00271503	0.00286399	0.00234786	0.00315842	0.00191406	0.00297521	0.002734	0.0021053	0.00300157	0.0022029	0.00201822	0.00196211	0.0023829	0.00262995	0.00218663	0.00203892	0.00233237	0.00207314	0.00328117	0.0023678	0.00340231	0.00299416
267	12.053	381041	299	Salicylaldehyde	77.6	2.93119e-05	5.23871e-05	2.95967e-05	2.02104e-05	7.54354e-05	3.48516e-05	4.14035e-05	4.76126e-05	0.000140583	2.76272e-05	4.70447e-05	5.78867e-05	7.73384e-05	0.000107488	4.77662e-05	7.47013e-05	8.19948e-05	5.88252e-05	0.000125655	6.98193e-05	5.24816e-05	6.55198e-05	0.000123601	8.17328e-05	4.74233e-05	6.25739e-05	6.83004e-05	0.000110244	3.33909e-05	7.67094e-05	8.33678e-05	4.97735e-05	3.4062e-05	5.73095e-05	5.18374e-05	4.28983e-05	6.56518e-05	0.000125299	3.27027e-05	3.92132e-05	6.95979e-05	3.82518e-05	0.000111612	6.93276e-05
268	12.057	381041	141.1	Cyano-l-alanine	85.7	6.46056e-05	9.73164e-05	8.739e-05	0.000110404	7.8736e-05	0.000116904	8.32863e-05	0.000106467	0.000103386	5.78666e-05	6.90228e-05	8.07626e-05	6.05471e-05	5.16068e-05	6.542e-05	6.51159e-05	8.28792e-05	0.000107607	7.43233e-05	7.36861e-05	5.97644e-05	5.51105e-05	0.000115763	0.00015808	5.72501e-05	0.000114671	0.000111555	8.70278e-05	8.64279e-05	9.01333e-05	0.000158498	0.000103402	9.95396e-05	7.01903e-05	0.000118769	6.9589e-05	8.50915e-05	0.000100325	8.68291e-05	8.76208e-05	7.5532e-05	6.88998e-05	0.000124625	8.75589e-05
271	12.144	381044	228.1	3-indoleacetonitrile	74.8	1.63362e-06	1.30697e-06	1.32835e-06	4.58826e-06	1.27229e-05	1.37137e-05	9.02886e-06	1.26075e-05	2.39759e-06	4.5009e-06	7.15202e-06	1.94561e-06	3.10476e-06	1.19505e-05	1.60052e-06	2.13323e-06	1.06898e-05	4.54693e-06	1.16395e-05	2.32943e-06	6.85323e-06	4.13056e-06	9.22011e-06	5.37816e-06	1.67531e-06	9.2312e-06	2.81356e-06	1.83773e-06	2.28203e-05	1.01771e-05	6.42665e-06	1.70006e-05	1.91657e-06	4.1888e-06	6.86347e-06	1.62619e-06	5.34927e-06	1.06026e-05	1.06954e-05	1.13698e-05	1.28101e-05	1.22987e-05	1.16065e-05	3.75822e-06
273	12.225	381046	298.1	Digitoxose	79.2	4.76399e-05	5.15533e-05	3.87898e-05	4.50278e-05	5.5851e-05	4.7496e-05	3.74134e-05	5.37548e-05	5.73015e-05	2.3613e-05	1.49867e-05	3.76519e-05	6.58123e-05	6.17615e-05	2.78148e-05	5.36326e-05	0.000349094	4.89988e-05	0.000119344	6.49361e-05	3.32394e-05	2.04873e-05	0.000114197	9.21473e-05	0.000286386	3.09038e-05	1.90008e-05	2.47636e-05	2.46738e-05	1.67333e-05	2.74125e-05	1.54369e-05	7.78962e-06	1.68138e-05	9.55631e-06	1.32893e-05	2.15045e-05	1.8781e-05	2.89637e-05	3.74174e-05	0.000109507	1.24587e-05	5.23217e-05	3.24942e-05
275	12.256	381047	218.1	L-threonine	99.3	0.028401	0.02908	0.0295629	0.0299688	0.0306136	0.0306045	0.0150382	0.0436294	0.0377572	0.0219812	0.0255477	0.0184552	0.0475607	0.00561457	0.00997341	0.0333305	0.0196584	0.0350552	0.0263301	0.0198644	0.01459	0.0258465	0.0132144	0.0531132	0.0205715	0.0365486	0.0242356	0.0293304	0.0188489	0.0311363	0.034471	0.0290385	0.0217221	0.0189995	0.0231223	0.0178166	0.0189906	0.0232699	0.0185966	0.017019	0.0380435	0.0257008	0.0526769	0.0278644
277	12.284	381048	147.1	Hydroxypropanedioic acid	95	0.009901	0.0100842	0.0103915	0.0105072	0.0105652	0.0107496	0.00581961	0.0149251	0.0129936	0.00803843	0.00965003	0.00852857	0.0163027	0.00236418	0.00377242	0.000220141	0.00724178	0.0119257	0.0100804	0.00710895	0.00361613	0.00899948	0.00506538	0.000153517	0.000203313	0.0126131	0.00861602	0.0101012	0.00701645	0.000124199	0.000203932	0.000116457	0.0088574	0.00681332	0.000102273	0.000122125	0.00658354	0.00806167	0.00683661	0.000160173	0.0128127	8.14019e-05	0.0173959	0.00959841
279	12.383	381051	174.1	O-acetylserine	85.2	4.35763e-05	4.51234e-05	5.95938e-05	4.16131e-05	6.88477e-05	3.79852e-05	2.39271e-05	2.09671e-05	0.000155346	8.40585e-05	3.74261e-05	3.76385e-05	2.56622e-05	5.13265e-05	5.21901e-05	6.21739e-05	7.85447e-05	0.000281657	0.000116446	5.15399e-05	3.76064e-05	5.94858e-05	0.000373046	7.16087e-05	3.47768e-05	6.57684e-05	5.63585e-05	3.22738e-05	7.08818e-05	4.08157e-05	3.68001e-05	6.48468e-05	0.000139346	6.31033e-05	5.99525e-05	4.39984e-05	6.16732e-05	0.000190677	6.23921e-05	6.7303e-05	0.000280127	5.8539e-05	4.73513e-05	4.06888e-05
280	12.391	381051	275	D-erythro-sphingosine	73.6	1.31429e-06	3.80653e-06	1.54139e-06	4.29983e-06	5.19076e-06	1.31198e-06	2.21086e-05	8.23231e-06	1.99075e-05	2.97584e-05	2.43489e-05	1.57727e-06	3.48988e-06	7.4355e-06	3.08132e-05	1.89736e-05	1.78244e-05	5.54984e-05	2.57808e-05	8.73442e-06	1.04291e-05	8.79147e-06	2.77629e-06	1.84563e-05	2.0705e-05	2.59129e-05	1.6663e-06	3.45571e-06	1.58847e-06	2.05334e-06	8.37036e-06	4.25305e-06	1.7157e-06	3.37314e-06	2.66351e-07	1.5289e-06	1.40911e-06	2.88326e-06	9.38228e-06	1.43233e-06	1.21565e-05	1.05802e-05	1.36825e-06	3.596e-06
281	12.396	381052	234.108	Scopoletin	77.7	0.000349683	0.000367229	0.000403194	0.00043793	0.000429177	0.000460984	2.99805e-05	1.27398e-05	0.000158387	0.000492346	0.000335956	0.000198187	0.000135258	0.000321465	0.00048881	0.000627599	0.000436222	0.000416437	0.00067681	0.000196676	0.000645374	0.00114342	0.000449682	0.000164024	0.000233699	0.000227376	0.000325684	0.000202118	0.000561459	0.00034975	0.000462117	0.00036793	0.000444973	0.000344009	0.000621013	0.000533722	0.00042173	0.000468538	0.000266455	0.000493755	0.000433008	0.000467325	0.00101264	0.000400615
282	12.423	381052	294.1	5,7-dihydroxy-4'-methoxyisoflavone	72.4	7.71346e-05	7.50408e-05	7.86181e-05	8.17002e-05	8.96664e-05	8.09827e-05	0.000107269	0.000118904	0.000135702	0.000169406	0.000124998	0.000157707	0.000149221	0.000131213	0.000136554	0.000123439	0.0001272	0.000130467	0.000122061	0.000125486	0.000114719	0.000124083	0.000142719	0.000102545	0.000119978	0.000127924	6.80488e-05	0.000115237	6.45721e-05	8.49335e-05	0.000133933	7.37799e-05	5.70863e-05	6.25439e-05	7.18828e-05	8.22838e-05	7.81535e-05	6.99141e-05	6.29926e-05	7.49788e-05	0.000116163	9.65413e-05	0.000168246	0.000131638
284	12.5	381055	88.0333	Thymine	81	0.001804	0.00189913	0.00186904	0.00192212	0.00196435	0.00195428	0.00190276	0.00186367	0.00188348	0.0019495	0.00198489	2.92949e-05	2.17309e-05	0.00183123	0.00179661	0.00193863	0.00184481	0.00191158	0.00185873	0.00184079	0.00187066	0.00185209	0.00191891	0.00205285	0.00190909	0.00200484	0.0019543	0.00190334	0.00195231	0.00194735	0.00194488	0.00196311	0.00183569	0.00191588	0.00184306	0.00178847	0.00189668	0.00189194	0.00187494	0.00186899	0.00181185	0.00193983	0.00191178	0.00194591
287	12.599	381058	174.1	Tranexamic acid	88.8	0.00134755	0.00135003	0.00135244	0.0014079	0.0014448	0.00144232	0.00138359	0.00168018	0.00161377	0.00135111	0.00153092	0.00145701	0.00160167	0.00140044	0.0015073	0.00149899	0.00140204	0.00151064	0.0015174	0.00156671	0.00136545	0.00130052	0.00143217	0.00172953	0.00122249	0.00165834	0.0013031	0.00150591	0.00137091	0.00128223	0.00157769	0.00137447	0.00146423	0.00119193	0.0013286	0.00129193	0.00123558	0.00136588	0.00134984	0.00128956	0.00152825	0.00139153	0.00149923	0.00155986
288	12.635	381059	147	Glutaric acid	82.5	0.00036858	0.000333593	0.000376575	0.000325043	0.000338197	0.000340181	0.00202546	0.000618141	0.00151192	0.000392133	0.000310328	0.000305848	0.000370614	0.00209432	0.00022927	0.000455398	0.00145992	0.000363974	0.000398799	0.000956936	0.000216728	0.000468443	0.000228521	0.000907326	0.00124678	0.000366467	0.000348177	0.00186471	0.000363753	0.000251029	0.00047685	0.00035052	0.000382953	0.000472299	0.000329154	0.000354665	0.000957273	0.000202541	0.000288284	0.000225147	0.000400214	0.000315107	0.000439269	0.000244762
289	12.637	381059	234.1	Tromethamine	97.1	0.000373529	0.00032314	0.000329686	0.000285221	0.000299432	0.000279468	0.008895	0.000121511	0.00716395	0.000213719	0.000306662	0.000154501	5.83772e-05	9.17543e-05	6.82425e-05	8.28347e-05	6.23178e-05	5.41492e-05	6.14976e-05	9.06307e-05	6.62251e-05	7.95581e-05	7.45122e-05	0.00013241	7.61476e-05	9.50542e-05	7.25094e-05	9.00124e-05	3.81808e-05	6.03448e-05	6.46897e-05	6.99082e-05	0.000235025	7.60803e-05	6.33343e-05	5.5384e-05	3.76894e-05	9.47891e-05	5.42384e-05	4.35416e-05	9.23917e-05	5.47065e-05	9.36634e-05	7.5025e-05
293	12.745	381062	104	Hydrocinnamic acid	70.9	0.000201704	0.000142284	0.00013293	9.0956e-05	8.88366e-05	9.85162e-05	0.00057598	0.00053757	0.000384301	0.000346791	0.000280218	0.000189531	0.000355037	0.000131557	0.000181272	0.000185945	0.000211626	0.000241582	0.000220092	9.3199e-05	9.93861e-05	0.000224824	0.000173395	0.000325159	0.000277001	0.000283107	0.000145999	0.000195426	0.000108249	0.000129503	0.000131071	0.000116083	0.000106935	8.05731e-05	0.00011048	0.000100176	8.13121e-05	8.51305e-05	8.72698e-05	8.98924e-05	0.000217651	0.000149408	0.000246891	0.000212258
295	12.781	381064	154.9	Metharbital	83.2	5.91773e-05	3.52581e-05	4.07521e-05	5.36286e-05	5.30438e-05	8.3162e-05	0.0249745	6.1377e-05	5.13518e-05	4.55863e-05	3.82242e-05	0.0256912	4.98263e-05	2.62255e-05	3.41e-05	6.82176e-05	6.75273e-05	8.55005e-05	3.14519e-05	4.36026e-05	4.8227e-05	3.51538e-05	3.74618e-05	0.000113204	5.032e-05	0.0269603	8.41177e-05	0.0255528	0.0242555	3.35636e-05	5.17168e-05	4.28851e-05	4.29034e-05	5.79039e-05	0.0245123	0.0236427	4.39763e-05	2.73253e-05	4.55757e-05	6.49307e-05	5.21829e-05	4.01194e-05	0.0257103	4.65109e-05
300	12.906	381068	305.1	2,3-dihydroxy-acrylic acid	92.7	1.32731e-06	8.62808e-06	1.02629e-05	1.07543e-05	9.67759e-06	1.15991e-05	1.61813e-05	1.55182e-06	1.00299e-05	1.97445e-06	3.78318e-06	3.26604e-06	5.73326e-05	2.66351e-07	1.66536e-06	2.29597e-06	7.43264e-06	9.91984e-06	1.74096e-06	2.92172e-05	1.55184e-06	9.74482e-06	1.19177e-05	1.79406e-05	5.69247e-06	2.07218e-05	2.96568e-06	1.98044e-06	2.66351e-07	5.12082e-06	1.92427e-06	4.49808e-06	2.66351e-07	1.36985e-06	2.66351e-07	2.66351e-07	2.66351e-07	5.97827e-06	2.66351e-07	1.68264e-06	1.04776e-05	1.59911e-06	8.39872e-06	5.65304e-06
302	12.971	381070	248.1	Beta-alanine	97.3	0.000564804	0.000627626	0.000683788	0.000711599	0.000751011	0.000766745	0.000762519	0.00125695	0.000990211	0.000530935	0.000705864	0.000612678	0.00364116	0.000317688	0.000483032	0.000956781	0.000440263	0.000717228	0.00116506	0.00198367	0.000341906	0.000776845	0.000853494	0.00152819	0.000590971	0.00141838	0.000464221	0.000863151	0.000509447	0.000550267	0.000623367	0.000489	0.000420023	0.000313892	0.000355716	0.000386517	0.000394064	0.000505271	0.000371592	0.000224164	0.00101638	0.000447692	0.000814905	0.000741807
305	13.026	381071	233.1	(s)-3,4-dihydroxybutyric acid	97.3	0.000281845	0.000288505	0.000273924	0.00028436	0.000284568	0.00032001	0.000482275	0.000537808	0.000480579	0.000421813	0.000415819	0.00127692	0.00104606	0.000359362	0.000660133	0.000379899	0.000871116	0.000657468	0.000693044	0.000697769	0.000676058	0.00101436	0.00116532	0.000695396	0.000361125	0.000388966	0.000234807	0.000382971	0.000552795	0.000175306	0.000312007	0.000347838	0.000259717	0.000278716	0.000305062	0.00021872	0.000189757	0.000241618	0.000216519	0.000244421	0.000287505	0.000235511	0.000299829	0.000334936
308	13.073	381073	94.0904	Atropine	65.6	0.000834545	0.00109554	0.0013206	0.00148737	0.00146093	0.00139437	0.000529742	0.000628026	0.000815748	0.000623226	0.000702321	0.000606928	0.000592008	0.000844589	0.00079497	0.00109132	0.00103839	0.000813899	0.00105635	0.00103897	0.00116937	0.000776188	0.00106209	0.00137203	0.00121626	0.00117187	0.00168972	0.00151742	0.00217575	0.00131655	0.00145445	0.0019845	0.00237105	0.00230437	0.0017855	0.00157356	0.00189593	0.00163605	0.00237267	0.00179807	0.00128551	0.00186125	0.000942279	0.00112985
309	13.122	381074	117.1	6-deoxyglucitol	77.9	0.000105676	6.80369e-05	0.000103258	8.39068e-05	0.00011355	0.000120107	0.000111766	6.16253e-05	0.000133705	0.00014815	0.000154715	0.000321164	7.49988e-05	0.000143801	0.000108282	7.66441e-05	0.000198673	9.83969e-05	0.000104794	6.48858e-05	0.000188494	0.000185424	0.00016285	0.000151164	0.000185973	5.62129e-05	0.000129929	0.000143356	0.000194585	0.000148118	0.000148075	0.000113888	0.000155073	9.69302e-05	3.0763e-05	8.69993e-05	0.000131771	8.61301e-05	0.000113429	0.000125209	0.000112341	0.000165973	0.000329469	6.58782e-05
311	13.154	381075	172.1	N-methyl-l-leucine	78.7	0.000308969	0.000314579	0.00029492	0.000329989	0.00032833	0.00030393	0.000339534	0.000439505	0.000100651	0.0010798	0.000147456	0.000810486	0.00247114	0.000486497	0.000272749	8.25617e-05	4.02479e-05	0.000140007	0.000106249	0.000643051	0.00024804	6.71121e-05	0.000358824	0.000140282	0.00016103	0.000246624	0.00033381	0.00272684	0.00410136	0.000126853	0.000104705	0.000186943	0.000366997	8.38129e-05	0.00195547	0.00062844	0.00015127	8.23016e-05	6.30481e-05	0.000288104	0.000191176	0.000179215	6.31876e-05	0.000272573
312	13.171	381076	243.08	Dodecanol	76	0.000177524	0.000109961	0.000159491	0.000175731	0.000210181	0.000202676	0.000799041	0.000774084	0.000353136	0.000321758	0.000242795	0.000211782	0.000181926	0.000156944	0.000151952	0.00018741	0.000172294	0.000221189	0.0001349	0.000167776	0.000113244	0.000108428	0.000123417	0.000194435	9.52471e-05	0.00020919	0.00018394	0.000220787	0.000186672	0.000165837	0.000230106	0.000175153	0.00018494	0.000122577	9.92729e-05	0.00015032	0.000190268	0.00019974	0.000168536	0.00012396	0.000194016	0.000173497	0.000173583	0.000168204
313	13.192	381076	147.1	2,4-diaminobutyric acid	86.6	0.000445987	0.000316415	0.000401812	0.000358484	0.000433412	0.000457968	0.000453681	0.00154817	0.000567438	0.000115493	0.000319419	9.07798e-05	0.000787447	0.0002436	0.00018103	0.000123315	0.000138694	0.000578616	0.000152959	0.0023493	0.000228897	0.000386089	0.000298086	0.000550465	0.000334996	0.00123021	0.000596601	0.00093975	0.000538718	0.000426819	0.000518965	0.00119402	0.000486555	0.000590596	0.000446597	0.000656443	0.000670275	0.000565618	0.000491401	0.000484931	0.00105012	0.000476182	0.000282882	0.000675413
318	13.34	381081	350.198	Phosphenodiimidic amide	80.9	0.00487773	0.00463315	0.00475742	0.00498467	0.00585776	0.00553376	0.00680502	0.00604939	0.00899485	0.00901594	0.00617937	0.00871834	0.0125051	0.00500602	0.00682416	0.00675834	0.0089306	0.00629292	0.0101641	0.00995738	0.00628688	0.00649094	0.00746779	0.014918	0.00916474	0.00792988	0.00954861	0.00801579	0.00568011	0.00409945	0.00651853	0.00663107	0.00648064	0.0069456	0.00640783	0.00569548	0.00512273	0.00359546	0.00603777	0.00581371	0.00518006	0.0052414	0.0123839	0.00697832
319	13.368	381082	174.1	Putrescine	93.5	0.0165573	0.0168916	0.0172064	0.0171819	0.0179033	0.0177397	0.0166066	0.0190218	0.0180417	0.0169208	0.018008	0.0175136	0.019038	0.0164414	0.016186	0.0161821	0.0162508	0.0173282	0.0173056	0.0188003	0.0168847	0.0156178	0.0166181	0.0182588	0.0159062	0.0183512	0.0157221	0.0176938	0.0162311	0.0157495	0.0178451	0.0155705	0.0165163	0.0152281	0.0164732	0.0159843	0.016148	0.0161723	0.0164198	0.0160689	0.0177056	0.0162697	0.0179857	0.0183543
321	13.456	381085	174.1	N-acetylputrescine	89.5	0.0931495	0.111562	0.121967	0.122119	0.141745	0.143336	0.098102	0.111433	0.105147	0.111434	0.120604	0.128325	0.133651	0.115779	0.117319	0.119648	0.113098	0.1264	0.137237	0.129042	0.123406	0.120982	0.131402	0.142603	0.14049	0.161522	0.105376	0.149504	0.119829	0.140941	0.142811	0.114935	0.12483	0.117923	0.11984	0.112878	0.13327	0.122677	0.126466	0.127172	0.14417	0.123947	0.156672	0.152083
322	13.456	381085	174.1	Serotonin	90.9	0.0931721	0.111588	0.122034	0.122206	0.141735	0.143346	0.0981754	0.111355	0.105152	0.111474	0.120646	0.128414	0.133693	0.115793	0.117362	0.11976	0.113099	0.12634	0.137283	0.129042	0.12347	0.121076	0.131675	0.142971	0.140578	0.161552	0.105455	0.149946	0.120064	0.141004	0.142867	0.114985	0.124858	0.117979	0.119917	0.112949	0.133363	0.122683	0.126537	0.12723	0.144201	0.123989	0.156686	0.152159
323	13.483	381085	229.156	Capric acid	90.2	0.00118225	0.0012489	0.00129355	0.00134813	0.00142906	0.0014336	0.001403	0.00132847	0.00169278	0.00167255	0.00177438	0.00586983	0.00148858	0.00213294	0.00195334	0.00129638	0.00164462	0.00140718	0.00170615	0.001317	0.00194049	0.0012771	0.00150029	0.00190902	0.00157826	0.002175	0.00206266	0.00229414	0.00156056	0.00143285	0.00176038	0.00159789	0.00185907	0.00173672	0.00164547	0.00143129	0.00149665	0.00131139	0.00165006	0.00334756	0.00139469	0.00180202	0.00184779	0.00168735
326	13.554	381088	315.167	D-fructose-6-phosphate	77.1	6.99336e-06	1.67167e-06	3.64743e-06	1.30559e-05	1.43074e-05	1.20708e-05	3.09933e-06	1.48168e-05	1.35296e-05	3.36127e-06	1.5577e-05	5.99355e-06	1.475e-05	4.54733e-06	2.24849e-06	6.84872e-06	7.63848e-06	3.32867e-06	5.34554e-06	1.09279e-05	4.96475e-06	7.85075e-06	7.53615e-06	1.53411e-05	1.46767e-05	7.88999e-06	6.85011e-06	2.13822e-05	7.62475e-06	9.3295e-06	2.47636e-05	2.74186e-06	1.87882e-05	9.79589e-06	3.67045e-06	1.87514e-05	4.59234e-06	6.0096e-06	1.66594e-06	3.53286e-06	1.40103e-05	1.5272e-06	6.13578e-06	7.46516e-06
331	13.623	381090	147.1	Aminomalonate	89.6	0.0156903	0.0175892	0.0175981	0.0180521	0.0192199	0.0192019	0.0384881	0.0464524	0.100962	0.0592252	0.0882514	0.0807571	0.0618276	0.0293612	0.071638	0.0819088	0.0466345	0.0272441	0.0870955	0.038157	0.0663679	0.0575327	0.0679071	0.135453	0.0689321	0.111051	0.0975006	0.119169	0.0815923	0.0679713	0.0965234	0.101465	0.134103	0.0824675	0.059983	0.0721629	0.0552068	0.0327731	0.0675463	0.0585551	0.0334492	0.0899713	0.0931356	0.0927688
332	13.636	381090	247.1	Citramalic acid	76.3	0.000231664	0.000184321	0.00020123	0.000198442	0.000239221	0.000241067	0.000385465	0.0029595	0.000217223	0.000437693	0.000387501	0.000215246	0.000284242	0.000277484	0.000183359	0.000436844	0.00018887	0.000380643	0.000224304	0.000220922	0.000241404	0.0005074	0.000304302	0.000890139	0.000199614	0.000490628	0.000340697	0.000303128	0.000454579	0.000356748	0.000668646	0.000392373	0.000158494	9.68814e-05	0.000165024	0.000223778	0.000119719	0.000408228	0.000157819	0.000167435	0.000154433	0.000141994	0.000226568	0.000188144
334	13.692	381092	155.1	L-glutamine dehydrated	86.4	0.000743266	0.000752429	0.0010608	0.00159946	0.00122443	0.00123032	0.000317435	0.000539265	0.000668012	0.000468489	0.000389789	0.000344975	0.000704036	0.000203916	0.000414882	0.000511641	0.000380717	0.00049959	0.000432952	0.000480397	0.000532506	0.000435746	0.000291846	0.00129555	0.000674284	0.000707092	0.000817813	0.000770545	0.00122554	0.00079059	0.000739567	0.00102994	0.000917801	0.000921551	0.000968317	0.000716467	0.00102073	0.000897917	0.000931812	0.000942852	0.000835841	0.000840737	0.000816187	0.000927073
338	13.75	381094	174.1	Glycyl proline	81.7	0.00422742	0.00439861	0.00443319	0.00450336	0.00462959	0.00455721	0.0038893	0.00450669	0.00427844	0.00383228	0.00421736	0.00406219	0.00445331	0.00393973	0.00393776	0.0039316	0.00402571	0.00422524	0.00409525	0.00467963	0.00422486	0.00373633	0.00401712	0.00417777	0.00371044	0.00434172	0.00381678	0.00413482	0.00406639	0.00378287	0.00428856	0.00399085	0.003985	0.00371288	0.00408895	0.00391298	0.00404808	0.00415608	0.00411779	0.00396908	0.00440205	0.00402349	0.00400574	0.00440845
339	13.779	381095	100	Parabanic acid	86.8	0.00155452	0.00157679	0.00160396	0.0016519	0.0016498	0.000910367	0.00298261	0.0112246	0.000902467	0.000977939	0.000871063	0.000797141	0.000971488	0.000891007	0.000759921	0.00631729	0.00287929	0.00464258	0.00088586	0.0009563	0.000957001	0.000911377	0.000813696	0.00252128	0.000811714	0.000971328	0.000896582	0.000886926	0.000854076	0.00187311	0.00515394	0.000923292	0.000877945	0.000877082	0.000866668	0.00084901	0.000846739	0.00542713	0.000862907	0.000876321	0.000996371	3.0563e-05	0.000885774	0.000968136
340	13.782	381095	160.061	N-carbamoylaspartate	85.4	0.00111615	0.00112708	0.00115811	0.00117502	0.00126017	0.00118718	0.00029161	0.000747826	0.00142802	0.000445639	0.00245216	0.0020177	0.00105581	0.000477614	0.000487813	0.000353055	0.000604035	0.000674496	0.000888382	0.00162365	0.000972687	0.000585829	0.00131509	0.00156675	0.00170806	0.00137552	0.000873321	0.00216358	0.00113734	0.000747335	0.000818164	0.00140512	0.00121822	0.00174873	0.0014781	0.00176993	0.00130861	0.000526834	0.0017156	0.00211828	0.00429968	0.00150199	0.00257014	0.00473225
343	13.881	381098	179.086	Nicotinamide	87.7	0.000150919	0.000159836	0.000154811	0.000146835	0.000163555	0.000151651	0.000213328	0.000192934	0.000142627	0.000161778	0.000148741	0.000103619	0.000302387	0.000173692	0.000119117	0.000148161	0.00046594	0.000109234	0.000277483	0.000289894	0.000159439	7.81748e-05	0.000230862	0.000291666	0.000461983	0.000825	0.000212423	0.000174978	0.00013727	0.000176728	0.000111975	0.000105408	0.00012053	0.000123293	0.000135406	0.000168184	7.91758e-05	0.000119493	0.000111129	0.000104356	0.00021624	0.000122129	0.000233945	0.000193477
345	13.912	381099	147.1	Malic acid	96.9	0.0021896	0.00234011	0.00234479	0.00247884	0.0026423	0.00259943	0.00525912	0.0105677	0.00455523	0.00289176	0.00262603	0.00230069	0.00580004	0.00209603	0.00258701	0.00190159	0.0030891	0.0030683	0.00253589	0.00562464	0.00155601	0.00177898	0.00483056	0.00828059	0.00259114	0.0102965	0.00449667	0.00644801	0.0032949	0.00211564	0.00316512	0.0047162	0.00294983	0.00227213	0.0023625	0.00240675	0.00305304	0.00287568	0.00298788	0.00182152	0.00435991	0.00216936	0.00448385	0.00335775
347	13.952	381100	175.1	5'-deoxy-5'-methylthioadenosine	74.9	0.000883631	0.00115349	0.00151908	0.00143802	0.00169434	0.00166042	0.000977964	0.00113048	0.00136153	0.0017041	0.00140728	0.00164268	0.00152896	0.00158993	0.00155034	0.00158196	0.000364134	0.0014798	0.00184745	0.0016451	0.00146847	0.000207081	0.00137621	0.00163461	0.00151959	0.00190777	0.000953526	0.00179852	0.00156852	0.001621	0.00180745	0.000559091	0.0015174	0.00137099	0.00136845	0.00144351	0.000334578	0.000369951	0.00154979	0.000187414	0.00167363	0.00172276	0.00281006	0.00201227
348	13.966	381101	174.1	N-acetylornithine	92.9	0.00431819	0.00537701	0.00627023	0.00710683	0.00814634	0.00823054	0.00515893	0.00618416	0.00727787	0.00761033	0.00755689	0.00759032	0.00821791	0.00728676	0.00690647	0.00716932	0.00644634	0.0077334	0.0085491	0.00829127	0.00679806	0.0068081	0.00762242	0.00831345	0.00818714	0.00990859	0.00417738	0.00890667	0.00594101	0.00827641	0.00948348	0.0056127	0.00586196	0.00577671	0.006842	0.00625097	0.00730596	0.00599525	0.00623091	0.00602224	0.00860699	0.00777755	0.0127168	0.00913994
349	13.994	381101	85.1	Tetracosane	93.1	0.00256441	0.00260542	0.0025689	0.00263223	0.00267706	0.00266364	0.00219272	0.00212442	0.00226009	0.0022545	0.00227127	0.00233337	0.0023045	0.00230677	0.00218118	0.00226584	0.00226638	0.00233017	0.00224212	0.00221873	0.00224586	0.00234436	0.00230141	0.00227157	0.00236771	0.00225333	0.00238696	0.00242209	0.00234857	0.00248105	0.00229023	0.00234052	0.00226494	0.00238517	0.00224623	0.00228846	0.00242304	0.00245243	0.00234521	0.00227784	0.00245387	0.00238959	0.00243618	0.00231083
350	14.038	381103	331.114	Alloxanoic acid	82.4	7.44545e-05	8.4557e-05	7.40204e-05	9.44434e-05	7.70334e-05	9.10243e-05	5.68032e-05	0.00123152	0.000374603	0.000129214	3.65646e-05	6.91321e-05	0.000808227	0.000196545	0.000288753	0.000234226	0.000649368	0.000714578	0.000590129	0.00319489	0.000121599	0.000158899	0.000308162	0.000346326	9.46716e-05	0.000851524	0.000566142	0.000963617	0.000444791	2.97101e-05	0.000443312	0.00128623	0.000590374	0.000985211	0.000401386	0.000632119	0.000430218	0.000417973	0.000524875	0.000674947	0.00129339	0.000439098	2.36655e-05	0.00059522
355	14.089	381104	209.08	Methylparaben	89.3	7.48503e-05	7.94219e-05	7.29662e-05	8.83455e-05	8.13303e-05	9.33253e-05	7.47274e-05	8.1786e-05	7.42854e-05	8.23771e-05	8.09995e-05	8.15838e-05	8.08632e-05	7.5777e-05	8.96416e-05	0.000161982	9.68655e-05	7.06254e-05	6.49618e-05	8.23417e-05	7.6726e-05	7.63944e-05	7.5131e-05	0.000106134	8.28371e-05	8.78951e-05	7.23107e-05	8.62147e-05	8.20936e-05	6.7192e-05	0.000108474	9.28755e-05	7.97319e-05	8.61298e-05	8.86657e-05	6.46347e-05	0.000105569	8.63692e-05	8.58462e-05	8.67971e-05	6.42466e-05	7.54965e-05	6.52912e-05	7.41125e-05
358	14.167	381107	117.1	Triethylene glycol	99.6	0.0352444	0.0358481	0.0358808	0.0364737	0.0373133	0.0371009	0.042977	0.0735463	0.0742687	0.0480767	0.0553883	0.0591457	0.0525575	0.0477477	0.0354999	0.044839	0.0634248	0.0856742	0.0552399	0.0963902	0.0575036	0.0707962	0.061316	0.0831656	0.0282888	0.0851946	0.0646899	0.0759057	0.0544127	0.0444425	0.0699344	0.0338036	0.034816	0.0551711	0.0436456	0.0514445	0.0415524	0.0698962	0.0479249	0.0443767	0.128509	0.0489098	0.0936069	0.0578463
361	14.19	381108	217.1	Erythritol	91.8	0.00231037	0.00241288	0.0024332	0.00243522	0.00250108	0.00246078	0.00313189	0.00511881	0.00300186	0.00316638	0.00363652	0.00646197	0.0107583	0.00482655	0.00333658	0.00383628	0.00297184	0.0063917	0.00764428	0.00638103	0.00235208	0.00327491	0.00617662	0.00635658	0.00267008	0.00387605	0.0022888	0.00281885	0.00435463	0.00191597	0.00364298	0.00254059	0.00225659	0.0030502	0.00292554	0.00210153	0.00179786	0.00265172	0.0022218	0.00257448	0.00372076	0.0021322	0.00277397	0.00307403
362	14.224	381109	111.1	Adipic acid	83.7	0.000214363	0.000242517	0.000263411	0.000185028	0.000217944	0.000271628	0.000437556	0.000342469	9.47348e-05	0.000273597	0.000266091	0.000177797	0.000156827	0.000111157	0.000111665	0.000213515	0.000160175	0.00022528	0.000127679	0.000104487	0.00012039	8.57871e-05	0.000143978	0.000242534	0.00025882	0.000153218	0.000101161	0.000118122	0.000124277	9.39306e-05	0.000229069	0.000119386	9.01946e-05	8.10316e-05	0.000207469	6.26077e-05	7.40016e-05	0.000420399	0.000108783	8.21562e-05	9.98553e-05	7.97493e-05	0.000256747	0.000119709
365	14.261	381110	267.1	Salicylic acid	97.3	0.000246538	0.000232152	0.000247946	0.000252443	0.00025365	0.000288018	9.94618e-05	0.000178683	0.000111914	8.88964e-05	6.94539e-05	6.6728e-05	7.31028e-05	9.38717e-05	7.29373e-05	8.98451e-05	0.000110317	0.000202354	8.26078e-05	8.99892e-05	6.99009e-05	0.000110081	0.000120237	0.000143281	0.000124314	0.000234892	0.000129703	0.000199375	0.000147145	8.07428e-05	0.000106112	0.000102398	7.27085e-05	5.79795e-05	0.000202091	7.7912e-05	0.000200775	0.01231	8.68588e-05	7.152e-05	0.000206825	0.000122236	9.95342e-05	9.66006e-05
367	14.301	381111	337.117	Tyramine	81	0.000573598	0.000548908	0.000651082	0.000584278	0.000613547	0.000613308	0.000768265	0.000649002	0.000594307	0.00085048	0.000913669	0.00094793	0.000827102	0.000819	0.000814511	0.000915236	0.000674013	0.00136361	0.001135	0.000963241	0.000602122	0.000964303	0.000796036	0.00107651	0.000814956	0.000835734	0.000589102	0.000846494	0.0008167	0.000776651	0.000965108	0.000573365	0.000606544	0.000626775	0.000558773	0.000606407	0.000489415	0.000555554	0.000688093	0.000760431	0.000747384	0.000659979	0.000679055	0.000810432
370	14.382	381114	170.1	Homoglutamine	69.1	6.87051e-05	6.34436e-05	7.77454e-05	6.86211e-05	6.49118e-05	9.37749e-05	4.50768e-05	8.01103e-05	3.44474e-05	1.71758e-05	0.000485047	3.61716e-05	0.000113855	5.9195e-05	1.49558e-05	6.49269e-05	0.000547795	0.000160325	0.000107197	0.000170112	2.50114e-05	0.000274892	7.97681e-05	0.00056709	5.45129e-05	5.87672e-05	5.37803e-05	0.000169904	4.92619e-05	3.90427e-05	4.73314e-05	6.41779e-05	1.44262e-05	2.86734e-05	2.0257e-05	0.00128483	2.15179e-05	2.92124e-05	7.102e-05	3.29081e-05	5.67766e-05	0.000231798	9.27818e-05	3.54355e-05
371	14.408	381114	176.1	L-methionine	94.7	0.00798856	0.00818739	0.00837643	0.00863187	0.00888455	0.00890272	0.00428142	0.00851794	0.0079739	0.00631837	0.00792306	0.00474736	0.0090462	0.00217211	0.00382735	0.00712788	0.00571904	0.0101076	0.00704575	0.00345347	0.00375305	0.00823603	0.00440398	0.0164525	0.00643757	0.0133331	0.00556861	0.00881376	0.00762942	0.00912605	0.00858409	0.0079946	0.00720976	0.00526907	0.00532201	0.00628926	0.00755234	0.00731999	0.00654427	0.00545317	0.014667	0.00826654	0.012923	0.00852866
373	14.434	381115	232.1	L-aspartic acid	98.2	0.00683372	0.00720423	0.0073522	0.00763833	0.00794263	0.00791113	0.00522094	0.0110113	0.00571045	0.00405651	0.00418924	0.003303	0.0193787	0.00334846	0.00264362	0.00695203	0.0100655	0.00974094	0.00945129	0.00878551	0.00292212	0.00342473	0.00480192	0.0114572	0.00719684	0.013892	0.00587669	0.0071773	0.00419066	0.00577607	0.00574586	0.00554035	0.00338204	0.00196512	0.00254946	0.00333868	0.00305686	0.00498969	0.00305721	0.00219081	0.00699115	0.00231869	0.00758776	0.00586569
374	14.446	381116	156.1	Oxoproline	94.1	0.0998362	0.0995247	0.101485	0.102823	0.104945	0.103926	0.138596	0.231659	0.157428	0.097084	0.127237	0.14315	0.317238	0.060647	0.0725853	0.131412	0.114924	0.166703	0.110304	0.184092	0.0731945	0.0745378	0.118091	0.254594	0.10963	0.236021	0.115543	0.162905	0.101153	0.114489	0.125512	0.12551	0.0760682	0.0645789	0.0699464	0.0837928	0.0670307	0.103175	0.0812235	0.0619168	0.112558	0.076112	0.258379	0.12642
375	14.495	381117	254.1	Cytosin	77.6	5.57151e-05	5.01891e-05	6.07314e-05	3.40816e-05	3.20108e-05	4.16611e-05	9.64082e-05	0.000249046	6.89443e-05	3.22044e-05	1.6514e-05	6.52377e-05	0.000229298	9.44882e-05	4.78432e-05	8.19112e-05	9.17833e-05	9.47249e-05	0.000113172	0.000246864	2.87605e-05	3.01084e-05	0.000100419	0.000130586	7.32656e-05	0.000109467	8.21471e-05	0.000101171	6.88071e-05	3.87854e-05	7.44292e-05	4.29085e-05	2.29777e-05	5.58009e-05	2.01019e-05	4.33926e-05	3.17056e-05	3.87161e-05	1.94703e-05	4.34957e-05	6.92997e-05	1.02384e-05	3.91913e-05	8.1457e-05
376	14.525	381118	230.1	4-hydroxyproline	95.3	0.0132095	0.0138327	0.0137862	0.014077	0.0143613	0.0143595	0.0129778	0.0160737	0.00736383	0.00744445	0.00916405	0.00432732	0.0236087	0.00355631	0.00299955	0.0177826	0.00442473	0.0207966	0.0125749	0.0143649	0.00547444	0.00653644	0.00817705	0.0244467	0.00252805	0.0133803	0.0105721	0.0132679	0.0156242	0.00509673	0.0223221	0.00616809	0.00433247	0.00357249	0.0080454	0.00962744	0.00500889	0.00841933	0.0067312	0.0060778	0.0351175	0.00311057	0.00566683	0.00773737
379	14.578	381120	232.1	5-methoxyindoleacetate	82.1	0.00394587	0.00436661	0.00522536	0.00513737	0.00616867	0.00730585	0.00357898	0.0119514	0.00365035	0.00233345	0.00285365	0.00456357	0.00667306	0.0022399	0.00271222	0.0098576	0.00602041	0.00857802	0.00443194	0.00928493	0.00334608	0.00481636	0.00373983	0.0104445	0.00310183	0.00686903	0.00424674	0.00600169	0.0042979	0.00610817	0.00814373	0.00506529	0.00448288	0.0036012	0.00336886	0.00367988	0.00633676	0.00928679	0.00454523	0.00471674	0.00961292	0.00380936	0.00707633	0.00420957
380	14.581	381120	232.1	Beta-glutamic acid	69.6	0.00416236	0.00457905	0.00522536	0.00539146	0.00589055	0.00602392	0.0035663	0.0119514	0.00365035	0.00233345	0.00282234	0.00418878	3.33613e-06	0.00258402	0.00271164	0.00954934	0.00602041	0.00894062	0.00461654	0.00956004	0.00317358	0.00481636	0.00390223	0.0107762	0.00310183	0.00723774	0.00424674	0.00571576	0.00413162	0.00564135	0.00810934	0.00505609	0.00411573	0.00392209	0.00323383	0.00385156	0.00588645	0.00848273	0.00454523	0.00413764	0.00991459	0.00347073	0.00707633	0.00437622
382	14.616	487221	174.117	4-aminobutyric acid	90.1	0.00115746	0.00106608	0.00100528	0.000964176	0.000886284	0.000946432	0.00336519	0.00420836	0.00153536	0.00121798	0.000961539	0.00104891	0.00256472	0.000953299	0.000785163	0.00115421	0.00183646	0.00170176	0.00152107	0.00156616	0.000689307	0.000853989	0.00201303	0.00246363	0.00143852	0.00176689	0.00103489	0.00091392	0.000738581	0.000838652	0.000919311	0.000784892	0.000699243	0.000554968	0.000701389	0.00059203	0.000541476	0.000932851	0.000682681	0.000555985	0.000980711	0.000534494	0.000890429	0.000752146
383	14.623	487221	314.1	Agmatine	75.7	0.000785544	0.000873136	0.00088898	0.000913947	0.000961934	0.00101132	0.00283341	0.00720307	0.000314785	0.000823495	0.000389636	0.000282483	0.000322151	0.000221821	0.000240799	0.00738913	0.00266685	0.00486798	0.000367729	0.000384815	0.000542548	0.00162857	0.000474535	0.00425126	0.000374071	0.000557317	0.000281242	0.000477903	0.000458138	0.00104601	0.00631281	0.000448364	0.000312788	0.000239432	0.000365573	0.000263085	7.9032e-05	0.0037564	0.000361512	0.000279495	0.000217587	0.000343191	0.000232875	0.000381873
385	14.66	487222	185.1	2-piperidinobenzonitrile	86.3	0.000396888	0.000328297	0.0964193	0.000396918	0.000453788	0.0964845	0.0914036	0.0899232	0.0925801	0.000419201	0.000508578	0.0936381	0.000646126	0.0939618	0.000326019	0.000476118	0.000452316	0.0934981	0.000603967	0.000354051	0.0928576	0.000680179	0.000452981	0.0925694	0.000318278	0.000337292	0.0945636	0.000240827	0.0927613	0.000204291	0.000360936	0.000203529	0.0935972	0.0946925	0.0935626	0.0932493	0.0947465	0.000240073	0.0931581	0.0928807	0.0929082	0.000128535	0.000567329	0.00042187
390	14.745	487225	263.193	2,6-bis(tert-butyl)phenol	78.2	0.000863897	0.000862127	0.000894517	0.000888898	0.000934892	0.000990568	0.000976008	0.000924043	0.000993977	0.00107605	0.00109217	0.00102657	0.00106384	0.000930611	0.000996798	0.00096923	0.000885539	0.000970317	0.00102927	0.000914086	0.00101086	0.000900977	0.000980398	0.000915213	0.00103266	0.000923963	0.00084332	0.00095555	0.00090566	0.000797674	0.000965211	0.000885483	0.000938242	0.00088718	0.000904843	0.000822451	0.000799552	0.0008175	0.000919254	0.000856887	0.000911224	0.000868247	0.00105838	0.000939457
396	14.832	487228	217.1	Xylonolactone	87.8	9.44725e-05	0.00012595	0.000122288	0.000117637	8.62438e-05	0.000113588	7.72832e-05	0.000101151	7.13374e-05	0.000446071	0.000170214	0.000179147	5.42677e-05	4.47781e-05	5.55538e-05	5.94433e-05	6.53005e-05	6.54189e-05	6.57031e-05	0.00016043	0.000124021	6.57644e-05	0.000257965	0.000194695	0.000141298	0.000148415	0.000144525	0.000147903	8.26278e-05	5.73186e-05	0.000179913	0.000190618	0.000180561	8.10214e-05	0.000354612	0.00013968	6.46392e-05	0.000122375	0.000164247	0.000148514	0.000136461	0.000197563	0.00018652	0.000156052
397	14.849	487229	219.1	2-methylglyceric acid	83.4	0.000465276	0.000469197	0.000479832	0.000484648	0.000470913	0.000450919	4.13374e-05	0.000366262	0.000125561	0.0123796	9.45423e-05	0.000111222	0.000121824	0.000165635	0.000109153	0.000104567	6.01695e-05	0.000182268	5.43833e-05	0.000289191	0.000103179	0.00010008	0.00547956	0.00106854	6.79625e-05	0.000153611	9.84362e-05	0.000144061	0.00062731	0.000108085	0.000150623	0.000155693	0.000210007	7.94943e-05	0.00845983	0.000210784	7.31648e-05	0.000120978	0.000103294	9.05842e-05	0.00015419	0.0014388	0.000174687	0.00043936
398	14.852	487229	232.133	5-hydroxynorvaline	88.1	0.000225241	0.000217263	0.000240293	0.000239275	0.000237327	0.000249458	9.11015e-05	0.000464566	0.000236697	0.000292822	0.000194184	0.000206072	0.000365023	9.92152e-05	0.000117858	0.000223665	9.79464e-05	0.000160517	0.000144589	0.000253763	0.000206091	7.28422e-05	0.000226735	0.000221577	0.000131544	0.000274221	0.000201369	0.000209955	0.000305301	0.00018031	0.000336456	0.000326079	0.000324627	0.000213824	0.000544901	0.000183442	0.000222016	0.000286369	0.000296368	0.000148578	0.000275042	0.000210629	0.000490672	0.000254703
401	14.902	487231	271.1	5-hydroxymethyl-2-furoic acid	84	4.95443e-05	6.16981e-05	5.88392e-05	6.37104e-05	6.37026e-05	5.38803e-05	8.56113e-05	9.3825e-05	0.00010063	5.01897e-05	4.11527e-05	0.000214607	0.000122113	4.6879e-05	3.86198e-05	5.51968e-05	4.11197e-05	3.65188e-05	6.52378e-05	5.33809e-05	6.80243e-05	2.79216e-05	0.00098157	6.8141e-05	8.8876e-05	1.96358e-05	4.10715e-05	4.2495e-05	3.19307e-05	2.37731e-05	1.90387e-05	6.40137e-05	3.7882e-05	2.98102e-05	2.68545e-05	6.00736e-05	2.25445e-05	3.11614e-05	5.17197e-05	1.56749e-05	0.000112336	2.29593e-05	5.94519e-05	2.53417e-05
402	14.914	487231	115.1	Creatinine	89.5	0.0054968	0.00543395	0.00535954	0.00503569	0.00497093	0.00486638	0.00226883	0.00674172	0.00579127	0.00593537	0.00995723	0.0177914	0.0116824	0.00334772	0.00709769	0.00455985	0.00437756	0.00407468	0.00662065	0.00543316	0.00490947	0.0052606	0.00776164	0.00863937	0.00518517	0.0079679	0.00787382	0.0103961	0.00746714	0.00487927	0.00631824	0.00881933	0.00900877	0.00933429	0.00585988	0.00613502	0.00638215	0.00601637	0.00852848	0.00948195	0.00583001	0.00958156	0.00736642	0.00529011
404	14.946	487232	220.1	L-cysteine	97.6	0.00723565	0.00749941	0.00740049	0.00758555	0.00776929	0.00768992	0.00307799	0.00839941	0.00879452	0.00612043	0.00693942	0.00740233	0.0148086	0.0040734	0.00475726	0.00397982	0.00657746	0.00940392	0.0104097	0.0100628	0.00520819	0.00440433	0.00697252	0.0103895	0.00842051	0.0162138	0.00831388	0.012947	0.00765931	0.00614527	0.00985079	0.00928462	0.00861843	0.0103311	0.00965908	0.00654119	0.00841794	0.00482856	0.00791118	0.00818746	0.00933736	0.00652975	0.0101753	0.00934856
405	14.97	487233	292.107	Erythronic acid	96.3	0.00369182	0.00371993	0.00375261	0.00375552	0.00386416	0.00385008	0.00332502	0.0050078	0.00761699	0.00256438	0.00375541	0.0071755	0.00219492	0.00524775	0.0062044	0.00241746	0.00326934	0.00321112	0.00394719	0.00518363	0.00545929	0.00174959	0.00309341	0.006223	0.00980265	0.0140931	0.00813721	0.0120204	0.00662239	0.00430807	0.0103664	0.00773854	0.0102779	0.0113298	0.00732989	0.00525033	0.00612937	0.00576476	0.00681841	0.00624985	0.00549768	0.00246755	0.00818788	0.00571887
406	15.002	487234	114.1	Glucose-6-phosphate	73.8	4.46359e-05	5.99957e-05	6.85251e-05	6.33792e-05	8.25765e-05	6.6912e-05	0.000225493	9.91943e-05	0.000158109	0.000228671	0.000179983	0.00033661	0.000104162	0.000255496	0.00034886	0.000159674	0.000220703	3.47761e-05	0.000220303	0.00010114	0.000177077	0.000183671	0.00016838	0.00024793	0.000325063	0.000148735	0.000154943	0.000175595	0.00012689	0.000158667	0.00018256	0.000130569	0.000155841	0.000185909	0.000220043	8.95548e-05	7.47431e-05	4.24415e-05	0.000163925	0.00016232	5.5173e-05	0.000173886	0.000163732	0.000199431
408	15.029	487235	117.1	Galactonic acid	81.7	5.99584e-05	5.62968e-05	7.35072e-05	7.56823e-05	5.74559e-05	7.03373e-05	0.000110132	0.000161867	8.4105e-05	9.47498e-05	0.000117942	0.000214498	0.000226854	0.000156121	0.000133026	0.00128717	0.000111295	0.000156486	0.000192262	0.000212255	8.57776e-05	0.00013536	0.000111089	0.000251865	8.91256e-05	0.000122728	8.27514e-05	6.6669e-05	0.000139626	5.65409e-05	0.000132246	9.54444e-05	8.5638e-05	9.23786e-05	9.29638e-05	7.24133e-05	7.28745e-05	7.24267e-05	9.17813e-05	0.000122191	9.89644e-05	7.37626e-05	0.000124402	0.000106741
410	15.057	487236	267.9	Beta-gentiobiose	63.7	3.44806e-05	3.83032e-05	3.36269e-05	2.52209e-05	2.58332e-05	2.97763e-05	4.18785e-05	8.11082e-05	6.6547e-05	2.22563e-05	1.76027e-05	2.29043e-05	6.78717e-05	1.43663e-05	5.49235e-06	1.37534e-05	3.30887e-05	4.20753e-05	3.36004e-05	5.96958e-05	1.43327e-05	6.25542e-06	3.47184e-05	7.43615e-05	5.3478e-05	2.47709e-05	1.81496e-05	2.57839e-05	1.47515e-05	1.35007e-05	2.3036e-05	6.56186e-05	1.78016e-05	1.52803e-05	1.6672e-05	6.02709e-06	7.79884e-06	5.94961e-06	4.183e-06	5.12339e-06	1.79907e-05	3.07172e-06	1.32229e-05	2.34817e-05
412	15.095	487237	244.1	3-methylene-2-phenyl-1-hydroxy-cyclopentene	72.6	8.35407e-05	7.12264e-05	8.38911e-05	9.44317e-05	9.08827e-05	9.53613e-05	0.000102321	0.000158784	0.000110474	0.000104584	0.000111344	0.000142926	0.000118677	7.22122e-05	0.000105044	0.00012336	0.000123377	0.000106297	0.000109599	0.000134965	8.77846e-05	9.26599e-05	8.9689e-05	0.00015449	0.00011669	0.000169634	0.000134033	0.00014205	0.000127098	9.90724e-05	0.000138551	0.000132574	0.000134643	0.000122649	0.000102732	9.12774e-05	8.93139e-05	9.41247e-05	0.000122146	0.000105693	8.19593e-05	0.000119921	0.000113306	0.000129278
413	15.118	487238	192.045	L-kynurenine	79.7	0.00243643	0.0025131	0.00280319	0.00287901	0.00326278	0.00323731	0.00300028	0.00223732	0.00353779	0.00655571	0.00432444	0.00449857	0.00251624	0.00405247	0.00536377	0.00447188	0.00551946	0.00329105	0.00709244	0.00323989	0.00472754	0.0056846	0.00496029	0.00492078	0.00649453	0.00358913	0.00472327	0.00352374	0.00412932	0.00296361	0.00365501	0.00407812	0.00432161	0.0043881	0.00430064	0.00369363	0.00335016	0.00262541	0.00361305	0.00424826	0.00290901	0.00377755	0.00766835	0.00423949
414	15.133	487239	213.1	Glutathione	72.9	2.89881e-05	1.31882e-05	1.85637e-05	2.32197e-05	1.93566e-05	3.06853e-05	1.36176e-05	2.64505e-05	6.15656e-05	1.94782e-05	1.7458e-05	4.98198e-05	1.35115e-05	1.15875e-05	2.71718e-05	3.43089e-05	2.68488e-05	1.46892e-05	1.66424e-05	1.53751e-05	3.57456e-05	1.60904e-05	3.77699e-05	3.09426e-05	1.23503e-05	2.6097e-05	1.69398e-05	1.71168e-05	1.19032e-05	2.32852e-05	3.39411e-05	1.95915e-05	1.06101e-05	2.39614e-05	3.20596e-05	1.9759e-05	1.95563e-05	1.71567e-05	4.30749e-05	3.5972e-05	1.13192e-05	2.63575e-05	3.29284e-05	3.37747e-05
418	15.238	487242	247.1	L-2-hydroxyglutaric acid	83.7	0.000210695	0.000219812	0.0002136	0.00023575	0.0002325	0.000233262	0.000523467	0.000497014	0.000303309	0.000516746	0.000468677	0.000491792	0.00053601	0.000682303	0.000363962	0.000486478	0.000741246	0.000324575	0.000423013	0.000463259	0.000247457	0.000523422	0.000638494	0.00111005	0.000490215	0.000600008	0.000324122	0.000462992	0.000303729	0.000167342	0.000383022	0.000369362	0.000294617	0.000229622	0.000286784	0.00022221	0.00016576	0.000159473	0.000251429	0.000278811	0.000219452	0.000337067	0.000789726	0.000221244
419	15.261	487243	198.036	Oxoglutaric acid	89.3	0.00076952	0.000785078	0.000767555	0.000828823	0.000822128	0.000787549	0.000865441	0.00134337	0.00084878	0.000645104	0.000976304	0.000860338	0.000804843	0.000741941	0.000523654	0.000598467	0.000592282	0.000548097	0.000732624	0.00320626	0.000542929	0.000787012	0.0015581	0.00192725	0.000811802	0.00208263	0.000965166	0.00139242	0.000618573	0.00088596	0.000638496	0.000984478	0.000445089	0.000482048	0.000555149	0.000499026	0.000630099	0.000515054	0.000793695	0.000477609	0.000698632	0.000506762	0.00198875	0.000614662
421	15.317	487245	329.103	Glycocyamine	80.4	0.000130229	0.000165281	0.000154982	0.000167053	0.000174624	0.000192419	4.06818e-05	2.95234e-05	8.44553e-05	0.000146563	0.000273913	0.000235683	0.000218533	0.000112719	9.36679e-05	0.000250707	6.67815e-05	0.000238416	0.000189228	9.02603e-05	0.000195836	8.85384e-05	0.000153151	0.000242963	0.000141039	0.000285178	0.000246503	0.000324327	0.000208461	0.000192866	0.000323483	0.000313459	0.000287486	0.000218703	0.000175852	0.000265537	0.000218503	0.000238216	0.000255341	0.000239329	0.000242855	0.000269115	0.000343806	0.000259085
423	15.348	487246	306.2	L-threo-2-pentulose	75.5	1.28782e-05	1.48875e-05	1.82655e-05	6.4339e-05	1.39796e-05	1.30495e-05	4.827e-06	3.85966e-06	1.3151e-05	1.33287e-05	1.30333e-05	1.82707e-05	1.07465e-05	1.0441e-05	1.39379e-05	2.08567e-05	1.19672e-05	3.60423e-06	1.96136e-05	6.12539e-05	8.74045e-06	1.38725e-05	1.36816e-05	3.41447e-05	1.28127e-05	1.53115e-05	1.21234e-05	7.1785e-06	1.46576e-05	5.1347e-06	1.13719e-05	1.23095e-05	1.47091e-05	7.10494e-06	8.49183e-06	8.57233e-06	3.0742e-05	3.86631e-06	7.59907e-06	3.91864e-06	1.33966e-06	1.47141e-05	4.11429e-05	1.17005e-05
426	15.407	487248	131.1	Glucosamine	80.6	0.000119854	0.000110142	0.000110218	0.000110707	0.000125387	0.000122497	0.00127862	0.000153202	5.00615e-05	0.00212331	0.00240912	0.00196105	0.000653606	0.00198257	0.00208376	0.00305852	0.0021269	0.000145243	7.06268e-05	0.000168683	0.00191082	0.00256852	0.00229389	0.00356281	0.00265945	3.9161e-05	0.00176028	0.00187184	0.00282108	0.00146545	0.00187391	0.00226735	0.00225546	0.00223816	0.0017832	0.00195346	0.00129515	0.00110898	0.00182173	0.00188443	0.000171225	0.00225299	5.08378e-05	0.00201047
427	15.416	487248	108.096	Linolenic acid	68.9	0.000352711	0.000338476	0.000337051	0.000356757	0.000381806	0.000374959	0.000346572	0.000380463	0.000366008	0.000462055	0.000396055	0.000376424	0.000365346	0.000348967	0.000380413	0.000373754	0.000368222	0.000392973	0.000372244	0.000387849	0.000370271	0.00036825	0.00037282	0.00035717	0.000360013	0.000381958	0.000345282	0.000362125	0.000355781	0.000368987	0.000388545	0.000335622	0.000392351	0.000352751	0.000354848	0.000334156	0.000366388	0.000408619	0.000358962	0.000352919	0.000373871	0.000353002	0.000346103	0.000428458
429	15.461	487250	219.1	Chlorogenic acid	75.6	7.09519e-05	0.000260303	3.15569e-05	2.37511e-05	0.000274457	0.000275436	8.75238e-05	0.000140105	0.000437602	0.00171432	0.000848301	0.000650824	3.13223e-05	0.000861362	2.41764e-06	0.000624743	0.000218436	4.63979e-05	0.0011227	0.000550751	0.0008762	0.0010542	0.00161175	5.01006e-05	1.50142e-05	0.000125732	0.000779138	0.00137706	0.00115396	2.27678e-05	8.37287e-05	0.000984933	1.44356e-05	0.00104785	1.06951e-05	0.00135714	1.03327e-05	4.1373e-05	0.00140224	1.51887e-05	0.000316223	0.000830143	2.86052e-05	0.00082055
430	15.47	487250	343.122	Guanidinosuccinate	72.7	4.33004e-05	7.04244e-05	8.5039e-05	8.27732e-05	7.82347e-05	6.86021e-05	3.49589e-05	9.42289e-05	6.52447e-05	4.85097e-05	5.97964e-05	5.81009e-05	5.80942e-05	4.74024e-05	5.13046e-05	6.74224e-05	5.31464e-05	7.62531e-05	7.73914e-05	6.40079e-05	4.09553e-05	6.50628e-05	5.24279e-05	9.52161e-05	7.41512e-05	7.99819e-05	4.23255e-05	8.89452e-05	5.15306e-05	5.93502e-05	8.09879e-05	4.86575e-05	5.87593e-05	4.84823e-05	5.04523e-05	5.8233e-05	5.16339e-05	6.7568e-05	5.57482e-05	5.36594e-05	8.3203e-05	5.85932e-05	8.07977e-05	6.73529e-05
431	15.531	487252	174.1	Phosphoglycolic acid	84.4	0.0163205	0.0167351	0.0170689	0.0172329	0.0176159	0.0175447	0.0202908	0.0177212	0.0189534	0.0166021	0.0173567	0.0184236	0.0186787	0.0168869	0.0166593	0.0180156	0.0219757	0.0162756	0.0182246	0.0217096	0.0213655	0.0162399	0.0175091	0.0165143	0.0177495	0.0196653	0.0155735	0.0198085	0.01967	0.0167592	0.0180193	0.0187139	0.0174581	0.0174746	0.0168427	0.0202368	0.0168863	0.0158566	0.0195163	0.0166255	0.0197728	0.0171149	0.0196333	0.0202342
436	15.613	487255	147.1	Isocitric acid	83.3	0.00107628	0.000364976	0.000474016	0.00110073	0.00390068	0.00529286	0.0035862	0.0024447	0.00453083	0.00561293	0.0086002	0.0134046	0.00370367	0.00274553	0.00570958	0.00879352	0.0047746	0.00204677	0.00408905	0.00249582	0.00502479	0.00587716	0.00383	0.0120143	0.0062342	0.00832271	0.00876465	0.00797554	0.00780729	0.0125173	0.00852168	0.0109548	0.00891132	0.00513175	0.00498697	0.007827	0.00283083	0.00243174	0.00823934	0.00625513	0.00157958	0.00877643	0.00548706	0.00697084
437	15.62	487255	274.2	N-acetyl-l-aspartic acid	84.5	0.000640273	0.000731241	0.000743427	0.000811512	0.000837944	0.000856051	0.00665773	0.00268209	0.00903394	0.0127826	0.0202686	0.0073036	0.00779991	0.00654505	0.013028	0.0185363	0.0111816	0.00365931	0.00803344	0.00509871	0.0113814	0.013188	0.0076529	0.0282814	0.013807	0.019387	0.0192667	0.0189545	0.0169692	0.00664671	0.0213207	0.0262694	0.0215998	0.0120296	0.0111447	0.0185402	0.0062026	0.00486967	0.0188384	0.0146257	0.00216594	0.0202759	0.0132774	0.0157237
439	15.672	487257	310.071	2-tert-butyl-1,4-benzenediol	81.1	2.30522e-05	2.40316e-05	2.99005e-05	2.01128e-05	2.8479e-05	2.86636e-05	2.80121e-05	2.74966e-05	3.48278e-05	1.05209e-05	1.95383e-05	1.14963e-05	0.000128633	1.19365e-05	1.27772e-05	3.83782e-06	6.79269e-05	3.32062e-05	1.63467e-05	1.71349e-05	9.6141e-05	1.81395e-05	2.01531e-05	3.19077e-06	5.08134e-06	2.13686e-05	4.38802e-05	6.05778e-05	8.93607e-05	5.93646e-05	8.4205e-05	5.37169e-05	0.000171213	3.38383e-05	0.000156087	7.5585e-06	1.35503e-05	1.73879e-06	2.33323e-05	5.72344e-06	8.63173e-05	1.29012e-05	1.54653e-05	8.64397e-06
442	15.708	487258	241.1	2,5-dihydroxy-pyrazine	84.7	7.65052e-05	7.96087e-05	7.87256e-05	6.56647e-05	8.05126e-05	7.26777e-05	7.00572e-05	0.000115428	9.63288e-05	9.04682e-05	9.13694e-05	0.000130675	8.3565e-05	6.39951e-05	7.19178e-05	8.33886e-05	7.49647e-05	5.95609e-05	8.83964e-05	0.000126106	8.17211e-05	7.63692e-05	8.4133e-05	0.000110446	7.41575e-05	0.000122441	9.74576e-05	0.000125887	9.64919e-05	6.89971e-05	0.000111644	0.000116023	0.000102003	8.57885e-05	7.37574e-05	6.46649e-05	7.90363e-05	5.34062e-05	9.28771e-05	6.72074e-05	7.40938e-05	9.72717e-05	8.3619e-05	8.95462e-05
443	15.724	487259	274.186	2-hydroxy-2-pentenedioic acid	88.9	0.000112179	0.000141339	0.000140344	0.000164862	0.000170301	0.000171368	0.000573026	0.000288933	0.00125071	0.00211338	0.00321121	0.0014723	0.00123156	0.00111414	0.00364055	0.00360456	0.00166977	0.000593987	0.00156637	0.000569133	0.00207618	0.00271759	0.00133453	0.00386532	0.00201082	0.00249534	0.00308525	0.00227531	0.003438	0.000938571	0.00346253	0.00531084	0.00413214	0.00206771	0.00208607	0.00348738	0.001341	0.0010826	0.00370084	0.00271173	0.00033565	0.00381964	0.00195203	0.00225239
451	15.9	487265	147.1	L-cystathionine	85.2	0.00506064	0.00522481	0.0053248	0.00541673	0.00551382	0.00548793	0.0052551	0.0109407	0.00447714	0.00561837	0.0045067	0.00339976	0.0132565	0.00428845	0.00371371	0.00775701	0.00635906	0.0085729	0.00779106	0.00633529	0.004095	0.00553271	0.00818714	0.0111904	0.005329	0.00805693	0.00431828	0.00475473	0.00527011	0.0059674	0.00461591	0.00525389	0.00266875	0.00248854	0.00338288	0.000508584	0.00276881	0.0080876	0.00368453	0.00259367	0.00632876	0.0023547	0.00463665	0.0036595
452	15.901	487265	246.1	L-glutamic acid	98.6	0.0233168	0.0245179	0.0246953	0.0256713	0.0264489	0.026047	0.0217589	0.0540338	0.0193107	0.0211524	0.0174057	0.0140201	0.0660299	0.0157776	0.0122355	0.0359105	0.0271679	0.042036	0.0311311	0.0311348	0.0154124	0.0214908	0.036454	0.0554077	0.0195938	0.0382113	0.0177477	0.0216085	0.0192562	0.0264643	0.0206081	0.0212464	0.00753936	0.00554007	0.0110496	0.00879282	0.00882506	0.0405266	0.0131311	0.00590855	0.030981	0.0051898	0.0228268	0.0128092
456	16.001	487268	218.1	L-phenylalanine	97.5	0.0268641	0.0282011	0.0286851	0.0294479	0.0299915	0.0300654	0.023064	0.0285199	0.0295288	0.0295114	0.0260269	0.0223513	0.0373067	0.0240877	0.013365	0.0296192	0.0302643	0.0433749	0.0364867	0.0397701	0.0195464	0.0359462	0.0287935	0.0535567	0.0187374	0.0383848	0.019289	0.0279169	0.0266244	0.0276415	0.0282345	0.0235235	0.0197002	0.0159843	0.0215108	0.0186335	0.0213576	0.0186442	0.0208806	0.0194993	0.0349838	0.0232684	0.0285207	0.0231837
458	16.04	487270	87.1	N-acetyl-d-mannosamine	79.9	0.0017494	0.00170198	0.00184542	0.00176487	0.00184016	0.00184445	0.00160914	0.00157545	0.00156359	0.00162822	0.00164272	0.00165752	0.00168113	0.00163906	0.00152066	0.00166882	0.00163249	0.00169839	0.00163274	0.00162036	0.0016144	0.00171907	0.00160763	0.00166488	0.00166576	0.00172844	0.00172797	0.00178661	0.00165603	0.00173592	0.00163653	0.00163321	0.00166997	0.0017437	0.00162661	0.0016154	0.00176585	0.00164841	0.00165595	0.00166511	0.00167647	0.00166829	0.00173404	0.00165127
460	16.053	487270	223.1	3-hydroxybenzoic acid	87.1	0.000147922	0.000157476	0.000204609	0.000219711	2.72304e-05	0.000356243	8.24061e-05	0.000117964	9.80855e-05	4.55833e-05	0.00014889	7.82997e-05	0.00011713	7.68224e-06	9.73325e-05	9.4388e-05	9.64672e-05	6.58922e-05	6.46127e-05	0.000133891	7.53886e-06	0.000127483	6.48381e-05	0.000125927	0.000165853	0.000175281	8.6534e-05	0.000145747	9.87471e-05	9.6081e-05	0.000106227	0.000172958	0.00011133	8.14483e-05	7.52713e-05	9.54244e-05	5.99962e-05	6.99351e-05	0.000103203	8.72304e-05	7.86437e-05	5.26467e-05	7.385e-05	8.74572e-05
461	16.056	487270	200.1	Dodecanoic acid, isopropanol ester	80.8	0.000229284	0.000251149	0.000245118	0.000276514	0.000294127	0.000299472	0.000634239	0.000440858	0.000344255	0.000593655	0.000912543	0.000763502	0.000459592	0.00369297	0.000542759	0.00160658	0.00074541	0.000352454	0.000494028	0.000385135	0.000431611	0.00223015	0.000871342	0.000648604	0.000937881	0.00263799	0.000387592	0.000736826	0.00041333	0.00036486	0.000531172	0.000724551	0.000539376	0.000318756	0.000313786	0.000461978	0.000266931	0.000293603	0.0004095	0.00039507	0.000403282	0.000425472	0.00131172	0.000824646
462	16.072	487271	333.121	Acetaminophen	81.2	6.43456e-05	6.91773e-05	6.83594e-05	8.43378e-05	9.36897e-05	9.40755e-05	0.000176556	0.000181218	0.00023604	7.01476e-05	9.53276e-05	0.000134458	9.15004e-05	9.30642e-05	0.000315796	0.00012612	8.27976e-05	9.09959e-05	0.000134955	0.000262907	0.000137926	4.72161e-05	0.000141388	0.000214253	0.000694429	0.000301987	0.000147179	0.000232974	0.000175514	9.12471e-05	0.000203409	0.000151704	0.000387261	0.000366045	0.000282967	0.000181158	0.00017743	0.000103697	0.000468081	0.000239002	0.000176034	7.34264e-05	0.000262346	0.000158967
464	16.109	487272	292.1	Tartaric acid	90	8.68901e-05	8.84743e-05	8.68366e-05	8.83767e-05	8.99619e-05	7.61815e-05	0.000722233	0.000126031	7.28809e-05	2.25218e-05	1.56683e-05	3.96352e-05	3.14282e-05	2.93685e-05	0.000310407	4.86688e-05	2.24461e-05	3.87898e-05	3.00358e-05	4.0763e-05	1.7235e-05	2.44025e-05	0.000303438	9.363e-05	2.65779e-05	0.000295894	2.23691e-05	9.88568e-05	0.000239036	0.000121997	0.000253611	0.000123417	2.75821e-05	5.26608e-05	0.000511303	3.47534e-05	5.92534e-05	3.09782e-05	2.54463e-05	2.32556e-05	0.000558593	8.02467e-05	8.05067e-05	5.73769e-05
465	16.117	487272	204.1	Phytosphingosine	77.8	0.000642058	0.000707272	0.000692548	0.000745308	0.000812673	0.000727966	0.00056311	0.000458425	0.000720117	0.000919985	0.000914787	0.00117285	0.000849986	0.000987795	0.00139686	0.00142127	0.00132157	0.00201725	0.00217295	0.00141346	0.000898697	0.00166899	0.00131575	0.00185028	0.00122091	0.000902799	0.00161166	0.00122982	0.00207861	0.000759614	0.00123703	0.00144049	0.00155118	0.00177163	0.00112464	0.00121215	0.000709962	0.000893727	0.00142888	0.00170114	0.000964054	0.00116708	0.00113538	0.000965251
466	16.128	487273	229.11	3,4-dihydroxycinnamic acid	72.2	0.000328224	0.000360805	0.000344802	0.000344175	0.000357449	0.000339079	0.000260578	0.0003175	0.000336945	0.000454216	0.000419137	0.000382255	0.000276107	0.000371209	0.000405243	0.000364371	0.000399943	0.000351229	0.000435628	0.000318816	0.000395727	0.000487747	0.000406187	0.000473488	0.000370341	0.000308873	0.000554592	0.000366726	0.000457451	0.000291834	0.000331749	0.000440698	0.00051959	0.000442058	0.000468023	0.000348659	0.00038974	0.000362341	0.000401017	0.000502761	0.000298475	0.000386658	0.000321483	0.000383512
468	16.18	487275	171.1	1-methylhydantoin	74.2	0.000344346	0.000400224	0.000540696	0.000614375	0.000723448	0.00071446	0.000892362	0.00140465	0.000754277	0.000618114	0.000851011	0.000700981	0.000618633	0.000491167	0.000653628	0.000902739	0.000645287	0.0012559	0.000729552	0.00085326	0.000746824	0.000740981	0.000637854	0.00166305	0.000614914	0.00122707	0.000729488	0.0012065	0.000747404	0.000932995	0.00162455	0.00080408	0.000852741	0.000688925	0.000686204	0.000653615	0.000667885	0.000912325	0.000764606	0.000663332	0.000899654	0.000828455	0.00121745	0.000880589
470	16.21	487276	246.105	4-hydroxyphenylacetic acid	80.8	0.000405612	0.000535603	0.000482237	0.000715786	0.000831822	0.000827807	0.00123566	0.000834957	0.00165764	0.00267585	0.00299025	0.00391644	0.00106086	0.00256736	0.00326693	0.00324717	0.00294812	0.000854219	0.0034544	0.00081679	0.00293152	0.0026881	0.00246371	0.00322519	0.00416559	0.00273453	0.00207791	0.0028482	0.00264892	0.00316874	0.00278892	0.00310496	0.00391822	0.00351591	0.00248624	0.00261254	0.00190699	0.00134505	0.00268705	0.00229975	0.000923512	0.00302355	0.0031012	0.00235518
474	16.29	487278	380.152	Isoxanthopterin	72.9	0.000356072	0.000402924	0.000435075	0.00038668	0.000384216	0.000365046	0.000194241	0.000823861	0.000366034	0.00018668	0.000257769	0.000151745	0.000395457	9.37922e-05	4.6013e-05	0.000266916	0.00010098	0.000250654	0.000246222	0.000136108	9.84664e-05	5.95415e-05	8.42894e-05	0.000696013	0.00010507	0.000272885	0.000299402	0.000244884	0.000367834	0.000243462	0.000211796	0.000194102	0.000163099	0.00033343	0.000168297	0.000148928	0.000298402	0.000212964	0.00046072	0.000250867	0.000404788	0.000154373	0.000388323	0.00017731
477	16.355	487281	103.083	D-arabinose	96.8	0.000545878	0.000587764	0.000582902	0.000588325	0.000589186	0.000572565	0.000812982	0.000446481	0.000430027	0.000395371	0.000418433	0.000739884	0.000601065	0.0021042	0.000481437	0.000361804	0.000423965	0.000602919	0.000587835	0.000443981	0.000402322	0.000630844	0.000523403	0.000545719	0.000425894	0.000461995	0.000293661	0.000357007	0.000467686	0.000387472	0.000382127	0.000299648	0.000283372	0.000297927	0.000355829	0.000283015	0.000314484	0.000278812	0.000284011	0.000336124	0.000294972	0.000321586	0.000506051	0.000404005
479	16.409	487282	335.139	2-deoxypentonic acid	94.8	0.000105783	0.00010459	0.000106626	0.000110881	0.000103074	0.000129628	0.000100433	0.0003032	0.000126892	9.05455e-05	0.000195849	0.00107152	0.000571581	7.91062e-05	0.00021094	0.000119433	0.000660706	0.000337906	0.000367526	0.000288665	0.000142225	0.000111693	0.000308	0.000367972	0.000145237	0.000168243	0.000108668	0.000189084	0.000198511	6.85624e-05	0.000145045	0.000122304	0.000100929	0.000123426	0.000105367	0.000138582	6.92592e-05	9.87026e-05	8.5036e-05	9.5256e-05	0.000130488	0.000123994	0.000140527	0.000272678
480	16.419	487283	257.195	Dodecanoic acid	86.3	0.00103962	0.00108448	0.00105195	0.00111897	0.00112154	0.00114081	0.00212502	0.00126802	0.00100223	0.001372	0.00123924	0.000959864	0.000924099	0.00117092	0.00116596	0.000878135	0.00131316	0.000949786	0.000908924	0.00102056	0.00114844	0.000993925	0.000886098	0.00117158	0.0016158	0.00122494	0.00150337	0.00121765	0.00100384	0.00111086	0.00107504	0.00112848	0.00107587	0.00127209	0.00121384	0.0010059	0.00236538	0.00110974	0.00118256	0.0015159	0.00123036	0.00104002	0.00123911	0.00103783
481	16.446	487284	451.1	Pyrophosphate	96.1	0.00919926	0.0161738	0.0114246	0.0116195	0.0129087	0.0125877	0.00865889	0.0146097	0.0240249	0.0282627	0.0279896	0.0325328	0.0249463	0.0195655	0.0220867	0.0230014	0.0256631	0.0243468	0.0271739	0.0369034	0.0325129	0.0286453	0.0329575	0.0395708	0.0357212	0.0336542	0.0210172	0.036636	0.0233619	0.0201279	0.0302088	0.0279265	0.0308565	0.0264206	0.0248579	0.0215604	0.0214972	0.0264855	0.0283085	0.0243856	0.0355767	0.0206359	0.0261168	0.0378825
490	16.569	487288	326.1	Taurine	99.2	0.00594712	0.00530067	0.00444037	0.00395198	0.00390663	0.00373176	0.00197811	0.00658198	0.0058293	0.00175069	0.0013238	0.0022623	0.0153365	0.00163468	0.00103333	0.00134846	0.00688867	0.00529482	0.00374198	0.00758336	0.00114925	0.000755981	0.00454526	0.00760141	0.00755198	0.00399519	0.00307248	0.00346558	0.00104592	0.00134978	0.00182242	0.00108164	0.00097176	0.000767176	0.00158691	0.000870121	0.00110529	0.000951334	0.00116396	0.00086162	0.00211114	0.000870337	0.00182073	0.00212604
491	16.612	487289	116.1	L-asparagine	99.3	0.00484155	0.00537537	0.0053759	0.0056819	0.00598049	0.00596435	0.00254553	0.00419952	0.00575727	0.00296303	0.00335989	0.00227924	0.0062763	0.000738613	0.00180661	0.0039388	0.00264777	0.00570075	0.00382604	0.00472735	0.00225372	0.00383662	0.00217505	0.00830967	0.00234281	0.00710867	0.00358496	0.00479876	0.00367204	0.00582317	0.0048483	0.00443555	0.0029369	0.00268776	0.00314358	0.00338715	0.00475908	0.00419914	0.00332731	0.00364153	0.00633315	0.00454939	0.00877739	0.00539293
492	16.614	487289	147.1	D-xylulose	85.5	0.000667092	0.00232177	0.00215145	0.00217109	0.00218263	0.00226146	0.000883681	0.00226109	0.00230478	0.00179165	0.00179241	0.00115822	0.00285912	0.000495278	0.000968951	0.00179123	0.0015878	0.00230628	0.00173162	0.00164563	0.00136928	0.00171387	0.00127733	0.00326469	0.00093466	0.00474146	0.00125828	0.0016655	0.00141283	0.00213936	0.00182926	0.00133647	0.000707315	0.0010178	0.00130937	0.00129077	0.00169773	0.00159572	0.00133983	0.00147477	0.00220994	0.0016687	0.00353293	0.00197699
494	16.622	487290	146.2	1-monostearin	69.8	0.000242051	0.000148764	0.000209607	0.000279898	7.59849e-05	0.000268268	0.000105728	0.000168223	0.000241319	2.60583e-05	0.000202162	0.000163468	0.00018944	0.000100191	0.00013348	0.000220478	7.7211e-05	0.000144303	0.000123133	0.000391106	0.000113228	0.00012634	7.05527e-05	0.000359006	0.000120614	0.000127048	0.000155893	0.000118616	0.000148349	0.000163149	8.25891e-05	9.92441e-05	0.000153454	0.000152798	0.000172435	0.000140772	9.56911e-05	0.000168843	0.000119458	0.000155788	0.000324649	0.000159336	0.000319321	0.000138317
501	16.774	487295	200.1	Udp-n-acetylglucosamine	85.5	2.96206e-05	2.31401e-05	1.3577e-05	2.52801e-05	2.43514e-05	2.4028e-05	1.12356e-05	1.71683e-05	2.86258e-05	1.44964e-05	9.56434e-06	2.0731e-05	3.13815e-05	8.83304e-06	1.17062e-05	1.27529e-05	2.16094e-05	1.37239e-05	2.63939e-05	1.9775e-05	2.81609e-05	2.01729e-05	2.07378e-05	3.6807e-05	2.44263e-05	1.89364e-05	2.07999e-05	2.64079e-05	5.80818e-06	1.82338e-05	2.02646e-05	2.12591e-05	2.49346e-05	1.27878e-05	1.41975e-05	2.67214e-05	1.97756e-05	1.29883e-05	1.50579e-05	2.93314e-05	1.61032e-05	1.4212e-05	3.23546e-05	2.43885e-05
504	16.805	487296	363.2	3-hydroxymethylglutaric acid	81.3	1.76859e-05	1.43581e-05	1.50058e-05	1.36279e-05	1.28677e-05	1.34751e-05	4.06395e-05	1.49376e-05	1.90571e-05	2.75097e-05	7.98641e-06	2.36924e-05	3.86448e-05	1.34616e-05	2.03495e-05	8.88958e-06	1.84744e-05	2.33695e-05	2.73406e-05	1.62441e-06	1.10477e-05	1.56458e-05	3.01546e-05	1.60493e-05	2.86481e-05	1.27998e-05	2.15171e-05	2.56494e-05	4.63031e-05	2.77982e-06	1.60665e-05	7.99137e-06	1.15495e-05	1.61932e-05	1.60938e-05	3.30972e-06	3.32418e-06	9.94176e-06	4.76115e-06	1.51305e-05	9.1689e-06	2.746e-06	1.42865e-05	1.44352e-05
509	16.96	487301	297.1	Metanephrine	79.2	0.000369047	0.000353474	0.000422415	0.000432904	0.000489988	0.000501275	0.000428658	0.000362965	0.000487991	0.000919875	0.00059667	8.04225e-06	0.00120068	0.000582471	0.000734712	0.000621864	0.000768924	0.000492153	0.00100678	0.000524026	0.000670703	0.000797856	0.000687949	0.000721107	0.000902269	0.000517941	0.000651976	0.000525692	0.000609154	0.000411122	0.000542588	0.000554383	0.000604835	0.000578633	0.000643094	0.000521257	0.000531648	0.000358341	0.000521625	0.000608674	0.000461172	0.000551067	0.0011093	0.000610191
510	16.965	487301	282.1	4-(dimethylamino)azobenzene	81.5	0.000847749	0.000841142	0.000963609	0.000992932	0.00116659	0.00115541	0.00107427	0.000850808	0.00130782	0.00237463	0.00154683	0.0015883	0.000921332	0.00135772	0.00186404	0.00160699	0.0020153	0.0012337	0.00248883	0.00120881	0.00167608	0.00203621	0.00175815	0.00184805	0.0022698	0.00129495	0.00161163	0.00126111	0.00152197	0.0010085	0.00135699	0.00135972	0.00154597	0.00154584	0.00158018	0.00130696	0.00113879	0.000906537	0.00119545	0.00148457	0.00105429	0.00131971	0.00280691	0.00148519
511	16.993	487302	147.1	Glucosaminic acid	77.9	0.00012038	0.000141583	0.000214075	0.000234813	0.00022838	0.000401883	0.000428971	0.000241704	0.000223901	0.000897126	0.000321666	0.000227173	0.00115684	0.00052699	0.000468482	0.00105135	0.000558411	0.000542268	0.000376765	6.24888e-05	0.000556754	0.000599339	0.000552078	0.000621395	0.000511346	0.000259321	0.000398286	0.000242355	0.000500462	0.000246133	0.00045718	0.000261185	0.000489239	0.000449715	0.000551126	0.00027446	0.000242468	0.000369316	0.000669991	0.000472851	0.00029949	0.000734734	0.000609619	0.000258227
513	17.031	487304	228.1	O-phosphoserine	71.4	0.000111726	0.000109941	9.22862e-05	8.98199e-05	0.000112662	0.000103131	2.53944e-05	0.000473102	0.00024243	4.35307e-05	0.000126849	0.000125334	0.00032249	0.000127542	5.91399e-05	3.40062e-05	0.000136029	3.12581e-05	0.000120871	0.000988741	1.40384e-05	2.20003e-05	8.52144e-05	6.75095e-05	6.75874e-05	0.000446965	0.00011031	0.000384544	5.13051e-05	9.99843e-05	7.03768e-05	0.00032682	8.40138e-05	0.000109442	8.57933e-05	0.000123668	8.334e-05	3.42171e-05	6.08385e-05	8.04435e-05	0.000110548	5.49446e-05	0.000675107	0.000222726
514	17.043	487304	299.1	6-phosphogluconic acid	74.1	3.4317e-05	4.59544e-05	3.19159e-05	3.60079e-05	6.1619e-05	2.89918e-05	5.77367e-05	5.47291e-05	4.46705e-05	5.71436e-05	1.52076e-05	2.91674e-05	4.59075e-05	3.88025e-05	0.000205619	2.22643e-05	0.000162704	2.98875e-05	3.88831e-05	6.30023e-05	4.714e-05	0.000104016	2.84472e-05	6.85389e-05	3.55826e-05	6.2139e-05	5.20226e-05	4.67199e-05	2.5058e-05	1.97728e-05	4.11051e-05	1.48572e-05	4.3823e-05	2.82776e-05	2.18213e-05	3.39197e-05	1.53913e-05	2.61468e-05	3.11873e-05	0.000109334	4.44029e-05	0.000123949	3.56573e-05	3.59201e-05
522	17.124	487307	347.2	5-tert-butyl-1h-indole-2,3-dione	75.1	0.000179115	0.000153123	0.000189274	0.000170819	0.000184817	0.000178006	9.86929e-05	0.0172301	0.00385032	0.000548255	0.000697083	4.78369e-05	0.00367886	0.00406948	0.00103496	0.000428853	0.00409027	0.00067267	0.00224105	0.0277372	0.000395121	0.000379153	0.00157594	0.00102721	0.000910657	0.0135986	0.00441685	0.0137942	0.00128479	0.000391789	0.00208104	0.017217	0.00319732	0.0054115	0.00289081	0.00433819	0.00352025	0.00228356	0.0026887	0.00274074	0.00695941	0.00185594	5.9391e-05	0.00617855
523	17.14	487307	218.097	Dl-dopa	89.5	0.0031156	0.00304873	0.00296696	0.00294984	0.00298134	0.00292904	0.00193191	0.0144903	0.00514253	0.00469356	0.00412987	0.00189914	0.0216652	0.00171508	0.000915896	0.00253599	0.00904902	0.0120531	0.00794299	0.0117979	0.000494299	0.00378824	0.0051979	0.0142412	0.00133353	0.0147998	0.00847657	0.009958	0.00427412	0.00465774	0.00550737	0.0117472	0.00399961	0.0052694	0.00430354	0.0044055	0.00681899	0.00496889	0.00277088	0.00433015	0.00727206	0.00315715	0.0028236	0.00501436
525	17.165	487308	277.139	Indoxyl sulfate	88.4	0.00047942	0.000554699	0.000567189	0.000528642	0.00053557	0.000549496	0.000185458	0.000376041	0.0017894	0.000317932	7.46473e-05	0.00107049	0.00895816	0.000137322	0.000927529	8.09082e-05	0.000115974	0.00104874	0.000513992	0.00173872	0.000479303	0.0002451	0.00240955	0.000672373	0.000262543	0.000265586	0.000569271	0.00128095	0.000203547	0.000949789	0.000866606	0.000591061	0.000532275	0.000300593	0.000922997	0.000568776	0.000783608	0.000440964	0.000177447	0.000349814	0.000571141	0.000666097	0.000192342	0.000295214
529	17.238	487311	160.083	D-fucose	77.3	6.25179e-05	0.000100987	9.86437e-05	0.0001085	0.000109535	0.000132831	0.000209957	0.000243674	8.98141e-05	0.000145801	0.000134459	0.000161723	0.000155578	0.000115555	0.000111116	0.000153803	0.000130648	0.000196682	0.000184445	5.80351e-05	9.47487e-05	0.000134384	0.000165088	0.00019472	0.000113308	0.000278453	0.000156765	0.000154636	0.000182188	0.000131656	0.000151309	0.000158148	0.000105445	0.000119208	0.000134166	8.93287e-05	0.000109335	0.000109242	9.34584e-05	8.83897e-05	8.52773e-05	0.000132919	9.22511e-05	0.000713926
530	17.254	487311	185.094	Xanthurenic acid	74.7	0.000268762	0.000454785	0.000566577	0.000639303	0.000785676	0.000891182	0.000279715	0.000617757	0.000272795	0.000232283	0.00032774	0.000331988	0.00033587	0.000313038	0.000353683	0.000648228	0.000478922	0.000625318	0.000447123	0.000538416	0.000539087	0.000545925	0.00048651	0.000910346	0.000478718	0.000811298	0.00065771	0.000735441	0.000945953	0.000854622	0.00106754	0.00114445	0.00111402	0.000981792	0.00088715	0.000797546	0.000957308	0.00102405	0.00103301	0.0009727	0.000744071	0.000763846	0.000710567	0.000707965
531	17.27	487312	217.1	D-xylitol	98.1	0.002085	0.00210539	0.00214953	0.00215421	0.00222857	0.0021897	0.00206577	0.0148708	0.00211054	0.00208372	0.00309364	0.00915567	0.00796086	0.0025235	0.00282072	0.00341564	0.0019875	0.00582931	0.00594038	0.00499727	0.00303597	0.00249614	0.0056027	0.0071576	0.00204633	0.0048514	0.00240245	0.0025603	0.00366574	0.001699	0.00395191	0.00272056	0.00214052	0.00257354	0.0020298	0.00186718	0.00166439	0.00218705	0.00185366	0.00230932	0.00262536	0.0018951	0.0029605	0.00249217
533	17.284	487312	260.1	Aminoadipic acid	96.8	0.000308918	0.000323301	0.00033317	0.000336709	0.000328822	0.000322536	0.000229423	0.000510772	0.000173771	0.000199578	0.000369254	0.000152082	0.00057429	0.000186915	0.000151809	0.000473889	0.000190537	0.000774294	0.000264324	0.000734004	0.000212815	0.000481234	0.000170948	0.000798735	0.000261136	0.0004016	0.000254499	0.000199939	0.000257755	0.000401946	0.000521321	0.000423607	0.000179024	0.000185927	0.000235035	0.000274436	0.000248862	0.000361503	0.000467793	0.000293061	0.000514274	0.000181037	0.000481568	0.000272325
536	17.352	487315	117.1	Galactitol	87.6	0.00127122	0.00118082	0.00123905	0.00123154	0.00130884	0.00123703	0.00209104	0.000867305	0.00108921	0.000966422	0.00147129	0.0023741	0.00172579	0.00177679	0.00111388	0.00122671	0.000863359	0.00147081	0.00147549	0.00108391	0.000499263	0.00259909	0.00168572	0.000944937	0.00111285	0.00132405	0.000682353	0.000625283	0.00161155	0.000691194	0.00117526	0.000642379	0.000363396	0.000505158	0.000528756	0.000634971	0.000562196	0.000435945	0.000440069	0.00055098	0.000952167	0.000682494	0.00162037	0.00112454
546	17.607	582624	85.1	Squalene	80.8	0.00035316	0.000178024	6.18098e-05	0.000297848	5.9216e-05	0.000227628	0.000142678	0.000329441	0.000284652	0.00025288	0.000398152	0.000145089	0.000336342	0.00913253	0.000317889	0.000395453	0.000243906	0.000198848	0.000242311	0.000207283	3.05374e-05	0.00030171	0.000378685	0.000205382	0.00039901	0.000272695	0.000237287	0.000233604	0.000382452	0.00032139	0.000252849	0.000252889	0.000367957	0.00064728	0.0001041	0.000463246	0.000248704	0.000314337	0.000122073	0.000179585	0.000237977	0.000187833	0.000307806	0.000344757
548	17.634	582625	147	Arbutin	71.2	0.000555527	0.000793422	0.000818897	0.000571655	0.00137646	0.00155953	0.00330153	0.0048604	0.00171127	0.00124619	0.00202214	0.00802891	0.00223677	0.00272867	0.00201371	0.0125634	0.00670659	0.00125588	0.00122392	0.00156323	0.00316493	0.00198785	0.00169376	0.00533525	0.00176369	0.00365666	0.00227957	0.00291203	0.00145388	0.0027261	0.00522733	0.00360793	0.00407187	0.00219813	0.00113897	0.00248887	0.00286861	0.00211804	0.00225799	0.00244402	0.00158288	0.00277543	0.00720998	0.00212944
550	17.654	582626	254.083	Orotic acid	83.9	0.000240649	0.000216107	0.000271076	0.000242648	0.000306717	0.000261555	0.000315235	0.000509011	0.000352528	0.000343923	0.000222332	0.00055259	0.00115129	0.000516575	0.000625214	0.000375288	0.000625981	0.00034059	0.000513364	0.000574655	0.000256026	0.000213457	0.00054354	0.00127854	0.000410019	0.000583488	0.000320304	0.000512521	0.00032842	0.000261525	0.00042116	0.000269248	0.000317311	0.000280951	0.000313918	0.000240685	0.00024572	0.000286278	0.000250334	0.000328911	0.000315911	0.000305224	0.000423945	0.000305212
553	17.715	582628	229.088	Aconitic acid	87.2	0.000724735	0.000733379	0.000536786	0.00053847	0.000588026	0.000600997	0.00195979	0.00217781	0.00131489	0.00165835	0.0014871	0.00191498	0.00126826	0.00109548	0.00144442	0.00098971	0.00110006	0.0012917	0.00130889	0.000727521	0.000596813	0.000661223	0.00113883	0.00180598	0.0014036	0.000834228	0.00102724	0.000900134	0.000902571	0.00072459	0.00102878	0.000674074	0.000723182	0.000522745	0.000727252	0.000523967	0.00075922	0.000782573	0.000490047	0.000581899	0.000658805	0.000552128	0.000938423	0.000772591
555	17.76	582630	174.1	Ornithine	99.3	0.00775756	0.00675944	0.00718924	0.00639174	0.00659115	0.00672279	0.0561711	0.0161213	0.0106061	0.00400742	0.00339435	0.00497351	0.0080006	0.00242339	0.00170236	0.00664485	0.00291177	0.00780412	0.00385573	0.0219528	0.00195825	0.0040648	0.00406669	0.010811	0.00254149	0.0102915	0.00372282	0.00751386	0.00286135	0.00367521	0.00554619	0.00271417	0.00239112	0.00185514	0.0070215	0.002541	0.00240484	0.00294171	0.00211025	0.00252827	0.00757092	0.00340368	0.0114238	0.00685412
556	17.788	582631	297.1	3-hydroxy-3-(4'-hydroxy-3'-methoxyphenyl)propionic acid	81.2	0.000167867	0.000101126	9.62255e-05	0.000132396	0.000153604	0.00014333	8.52734e-05	0.0029312	0.0197808	0.000466032	0.000573812	0.000342657	0.000167534	0.000215237	0.00886381	0.00300472	0.00193268	0.00248804	0.000203088	0.000695057	2.39812e-05	0.000146631	0.00048099	0.00336148	0.00145601	0.000162899	0.000301743	0.00141999	0.000956522	0.000226271	0.000740217	0.00126874	0.00136306	0.00422349	0.000915789	0.000600016	0.000240619	0.00224973	0.000483789	4.66238e-05	0.00499612	0.000242302	0.00176487	0.00080385
559	17.848	582633	357.1	Glycerol 3-phosphate	96.3	0.00590099	0.00505546	0.00530231	0.00513903	0.00537409	0.00552314	0.016207	0.0446828	0.0188602	0.0120497	0.0084251	0.0177623	0.0139343	0.00448022	0.00549818	0.011004	0.00745635	0.00716854	0.0102198	0.0174966	0.00688489	0.00486079	0.00573504	0.0398708	0.00867103	0.0209647	0.0186406	0.0223992	0.00841696	0.00297959	0.00977393	0.00985444	0.00921352	0.00621803	0.00688955	0.00529855	0.00308354	0.00494202	0.00577387	0.00423997	0.00675458	0.00651071	0.00762068	0.00658755
560	17.851	582634	292.1	2-keto-l-gluconate	97.6	0.00160299	0.00157813	0.00160512	0.00158379	0.00165509	0.001655	0.00195942	0.00303068	0.0028115	0.00192304	0.00235794	0.00532971	0.00487803	0.00252359	0.00264533	0.00209785	0.00272293	0.00418494	0.00340469	0.00437846	0.00165672	0.00204587	0.00321455	0.00437281	0.00331188	0.00464656	0.00198306	0.00313297	0.00313252	0.00114419	0.00196478	0.00201883	0.00194797	0.00199221	0.00223754	0.00166485	0.00198603	0.00116126	0.00228292	0.00212764	0.0021741	0.00140012	0.00289917	0.0021346
565	17.952	582637	217.1	Vanillic acid	83.4	0.00161344	0.00586071	0.00654837	0.00692246	0.00150736	0.00726821	0.00380736	0.00209486	0.00277649	0.00782968	0.00671715	0.00440143	0.00353066	0.00477953	0.00524405	0.00684607	0.00208955	0.00476333	0.00964364	0.00329096	0.00393486	0.00952961	0.00964781	0.00426127	0.00225183	0.00357554	0.00165328	0.00161781	0.00603473	0.00565086	0.00620086	0.00293657	0.0029832	0.00281781	0.00512032	0.00267929	0.00420082	0.00209047	0.00166462	0.00274228	0.00388501	0.00444723	0.0014228	0.00337467
567	17.973	582638	257.1	L-cysteine-glycine	78.9	0.00026625	0.00029174	0.000399289	0.000475409	0.000363982	0.000377419	0.000645116	0.000451096	0.000928773	0.000899971	0.00115879	0.000764886	0.00080517	0.000750033	0.00114897	0.00111271	0.000679924	0.000672522	0.00135006	0.000697554	0.000966528	0.000978245	0.00731389	0.00265872	0.000770956	0.0017111	0.00167218	0.0019416	0.0017496	0.001133	0.0014927	0.00235695	0.00244622	0.00167384	0.00138965	0.00166889	0.00108623	0.000751422	0.00161934	0.00180537	0.000544369	0.00221939	0.00155969	0.00174182
568	18.007	582640	217.1	Methyl alpha-d-fructofuranoside	89.1	0.0116892	0.00854909	0.00879986	0.00831942	0.00881691	0.0079178	0.00112246	0.0024961	0.0025837	0.00148335	0.00160268	0.00433703	0.00346749	0.00497218	0.00521605	0.00262786	0.0192894	0.0046606	0.00992584	0.00305939	0.00389487	0.00444826	0.0243211	0.00415252	0.00203136	0.00220012	0.00172805	0.00146702	0.0218788	0.0061778	0.014653	0.000797304	0.00186531	0.00138355	0.00254161	0.00115844	0.00822565	0.00661005	0.00134893	0.00262189	0.0148442	0.00153574	0.00959495	0.00822932
569	18.036	582641	228.1	4-methylbenzenesulfonamide	90.3	0.00738612	0.00826201	0.00801111	0.00796453	0.00846379	0.00799227	0.00321057	0.00381754	0.00668983	0.00510051	0.00601998	0.00532688	0.0120069	0.00220018	0.00399485	0.00619776	0.00431828	0.00598069	0.00631691	0.00537102	0.00546197	0.00440137	0.00362124	0.00711529	0.00448707	0.248092	0.00562918	0.00655713	0.199761	0.006469	0.00759015	0.00686574	0.000198428	0.00591942	0.00584568	0.00572138	0.00795749	0.00611403	0.00627847	0.017419	0.0086735	0.00725175	0.00950445	0.00759906
570	18.05	582641	156.1	L-glutamine	99.3	0.444664	0.476473	0.476137	0.477204	0.495383	0.488983	0.18011	0.234821	0.413862	0.302265	0.34118	0.318959	0.300981	0.0894779	0.217456	0.365873	0.238025	0.378752	0.356641	0.311075	0.321513	0.260133	0.188081	0.402715	0.275641	0.458798	0.329875	0.38107	0.380507	0.403759	0.434564	0.422223	0.340583	0.364982	0.345561	0.346832	0.498026	0.351658	0.376015	0.383677	0.539532	0.443326	0.572927	0.45813
571	18.071	582642	292.104	Ribonic acid	84.3	0.00236025	0.00232245	0.00234052	0.00236	0.00239883	0.00237856	0.00293943	0.00353064	0.0030818	0.00291092	0.00308151	0.00754971	0.00860264	0.00222856	0.00290208	0.0036126	0.00361039	0.00769402	0.00497784	0.00564228	0.00230716	0.00298606	0.00446754	0.00524069	0.00249486	0.0046634	0.00220751	0.00328152	0.00414642	0.00222406	0.00375848	0.00341008	0.00221412	0.00389092	0.00284736	0.00224935	0.00226399	0.00279978	0.00277159	0.00229301	0.00338243	0.00243024	0.0036746	0.00288008
573	18.102	582643	217.1	Arabinofuranose	93.4	0.00425815	0.00669863	0.00736999	0.00920564	0.0104762	0.0102999	0.00484953	0.00681007	0.00797095	0.011728	0.0130762	0.0112596	0.00930756	0.0180081	0.012066	0.0131197	0.0174731	0.0382192	0.019304	0.00821726	0.0109721	0.0193441	0.0150709	0.00966553	0.0150741	0.00507333	0.0040699	0.0100155	0.0142245	0.0101891	0.0129879	0.00694477	0.0082134	0.00789222	0.0113462	0.00676944	0.00893347	0.00466272	0.0101641	0.0106195	0.00543264	0.0102596	0.00987378	0.00636432
575	18.139	582645	299.079	O-phosphoethanolamine	92	0.00194922	0.00253601	0.00294686	0.00319136	0.00357817	0.00360846	0.000786918	0.00152989	0.00389185	0.00226495	0.00254215	0.00230286	0.00828064	0.00307481	0.00277858	0.00121411	0.00527559	0.00265944	0.00719411	0.00854789	0.00311083	0.00189389	0.00596694	0.00469642	0.00788092	0.00444535	0.00245516	0.00393167	0.0034714	0.00233663	0.00177325	0.00251007	0.00335746	0.00283543	0.0030428	0.00282748	0.00303951	0.00136405	0.00375241	0.00201512	0.00437841	0.00284298	0.00473072	0.00325335
577	18.164	582646	238.1	Cytidine	74.2	0.00124796	0.001248	0.00124319	0.00125854	0.00137042	0.00133503	0.000105958	0.00145574	0.0157544	0.000484789	0.000971815	0.000259316	0.000365457	0.000446472	0.00483023	0.00240376	0.00135767	0.00246798	0.000412186	0.00063431	0.000347107	0.000360056	0.000647168	0.00207881	0.00212995	0.000326209	0.00046315	0.0012454	0.00086776	0.00270828	0.000689331	0.000942476	0.000835923	0.00247559	0.00106358	0.000512439	0.000324671	0.00113286	0.000345	5.47324e-05	0.00240463	0.000368898	0.00242992	0.000849006
578	18.175	582646	429.2	2-amino-3-hydroxy-estra-1,3,5(10)-trien-17-one	68.2	0.00228828	0.00281818	0.00313375	0.0038541	0.00457702	0.00899385	0.000325903	0.000655806	0.000593033	0.00084946	0.00127718	0.000672394	0.000544634	0.00084837	0.000352823	0.000516076	0.000497934	0.000513321	0.000337169	0.000553118	0.00127202	0.000808663	0.00100369	0.000658729	0.000856099	0.00101504	0.000915851	0.00116156	0.000739002	0.00094965	0.000655088	0.00065535	0.000571847	0.000346029	0.000936735	0.000653705	0.000641063	0.000478811	0.000556835	0.000546325	0.000842898	0.00062183	0.000720237	0.000613079
579	18.188	582647	271.106	Trans-trans-muconic acid	74.2	0.00023993	0.000310926	0.000331342	0.000290583	0.000358748	0.000308052	0.000594688	0.000297383	0.00166707	0.00147223	0.00176001	0.00122839	0.000922471	0.000847427	0.00240835	0.00151583	0.00123717	0.000705999	0.00157688	0.00066107	0.00209829	0.000881613	0.000957029	0.00413555	0.0024654	0.00197905	0.00319652	0.00306796	0.00329112	0.000914837	0.00242323	0.00380496	0.00425247	0.00335609	0.00223891	0.00240972	0.00142044	0.000813274	0.00281119	0.00280027	0.000399862	0.00310043	0.00135018	0.00252367
582	18.249	582649	392.2	N'-(1h-indol-3-ylmethylene)benzohydrazide	73.2	0.000106723	8.59796e-05	0.000129089	0.000119312	0.000104408	0.000102455	0.000268915	0.000285327	5.97302e-06	0.00037511	0.000336517	0.000341028	5.18366e-06	6.79198e-06	0.00037013	0.000343773	8.13392e-06	7.74191e-06	0.000393975	1.53832e-05	0.000381081	0.000363765	0.000404528	0.000342853	0.000136261	0.000294663	0.000352053	0.000323649	1.19014e-05	0.000276003	0.000371317	0.000346788	1.40357e-05	1.63407e-05	9.66749e-06	6.1286e-06	0.000171226	6.69547e-06	1.20265e-05	7.38868e-06	6.01436e-06	6.80071e-06	1.29964e-05	0.000406312
586	18.298	582651	295.1	Terephthalic acid	78.4	0.00106657	0.000899452	0.00093545	0.000897498	0.000925591	0.00087509	0.00346399	0.00462973	0.00169613	0.0013744	0.00130299	0.00131122	0.00115986	0.0011204	0.00115224	0.00109671	0.00107901	0.00141211	0.00106328	0.00137771	0.00125434	0.00126316	0.00247895	0.00192217	0.00110715	0.00159181	0.00125209	0.0014082	0.00110027	0.000950151	0.00131446	0.00151803	0.00113777	0.000975521	0.000993282	0.00100188	0.00090795	0.00111433	0.000998753	0.000987236	0.00143517	0.00103614	0.00114482	0.00122659
588	18.33	582652	288.13	Ascorbic acid	79.6	7.29582e-05	0.000102455	0.000101686	0.000121302	0.000145454	0.000223509	0.000281801	0.000833799	0.000918833	0.000893864	0.000620198	0.00054989	0.000901577	0.000365719	0.00102416	0.00103398	0.00121792	0.000280581	0.0015511	0.000761215	0.000820087	0.000898752	0.000836704	0.00119674	0.000899178	0.00166182	0.000967128	0.00216393	0.000802556	8.50591e-05	0.000940735	0.00304544	0.00264251	0.00275986	0.0011962	0.00171496	0.000489452	0.000470346	0.00129737	0.00125773	0.000458488	0.00211682	0.000187326	0.00229723
589	18.351	582653	359.105	Lactobionic acid	81.6	0.000491547	0.000598155	0.000616331	0.000676639	0.000802733	0.00077927	0.00350822	0.00341348	0.00758636	0.00671572	0.0108046	0.00432793	0.00342732	0.00241849	0.00764902	0.00641603	0.00445518	0.00156317	0.00776323	0.00342247	0.00668692	0.00437131	0.00466385	0.022723	0.00779107	0.0100387	0.00835649	0.0126935	0.0079678	0.00508878	0.00801452	0.0108939	0.0123815	0.00851837	0.00632922	0.00640954	0.00405017	0.00239036	0.00821334	0.00597731	0.00157134	0.00972754	0.00805604	0.00950196
590	18.375	582654	129.1	Palatinitol	87.9	0.00455832	0.00479597	0.00471688	0.00464978	0.00471657	0.00475031	0.00705249	0.00857879	0.00781095	0.0234935	0.0212149	0.0363128	0.00274928	0.0246474	0.0216383	0.0189568	0.041728	0.0188317	0.0260757	0.00393412	0.0191524	0.0246448	0.0282919	0.0104757	0.0446907	0.00810017	0.00936398	0.00787914	0.0257559	0.00362042	0.0147344	0.0138079	0.019688	0.0168575	0.0141042	0.0107038	0.00469023	0.00703744	0.0186189	0.0227039	0.00735051	0.0227742	0.0105972	0.00900527
591	18.388	582655	217.1	D-fructose	93.7	0.00427509	0.00442919	0.00474151	0.00450152	0.00460965	0.00492632	0.0370906	0.0467559	0.0521778	0.143268	0.0940499	0.423883	0.0143835	0.216409	0.184886	0.128284	0.270694	0.0835434	0.158886	0.0213996	0.0850591	0.16127	0.173515	0.0724998	0.250392	0.0454094	0.0391728	0.0420356	0.108805	0.015847	0.0818484	0.0647886	0.115475	0.0811628	0.0560924	0.0551176	0.022607	0.0336626	0.0842434	0.10832	0.0346792	0.076031	0.106059	0.0452644
592	18.399	582655	317.2	Azelaic acid	81.6	0.0065112	0.00677646	0.00699273	0.00657211	0.00698691	0.00708381	0.00224724	0.00298476	0.00115637	0.00223006	0.00165077	0.00361722	0.000922791	0.00402182	0.00316708	0.00240334	0.00814442	0.00295416	0.00247912	0.000721732	0.00169222	0.00272146	0.00447277	0.00160602	0.00353272	0.00182507	0.00117293	0.000663467	0.00178915	0.000431144	0.00161211	0.00137102	0.00155236	0.0013099	0.00117316	0.00140863	0.000781643	0.00108815	0.00166204	0.00137648	0.00171699	0.00113926	0.00095344	0.000866213
593	18.407	582655	117.1	Saccharic acid	86	0.00397817	0.00406573	0.00423508	0.00418538	0.00420763	0.00423507	0.00623316	0.00637385	0.00496547	0.0126751	0.0107537	0.0218224	0.0027583	0.0240324	0.019751	0.0102971	0.0263873	0.0130777	0.0143446	0.00342661	0.0099364	0.0154195	0.015367	0.00747464	0.0236332	0.00592583	0.00512091	0.00496125	0.0132505	0.00289919	0.00813967	0.00879566	0.0104899	0.00911239	0.00732831	0.00367786	0.00426243	0.00486613	0.0102983	0.0114312	0.00590749	0.0101079	0.00695899	0.0056027
594	18.415	582656	204.1	D-mannose	98	0.00830615	0.00845417	0.00857853	0.0083327	0.00867824	0.0083767	0.0532931	0.0460027	0.0253273	0.0906993	0.058179	0.071601	0.0148338	0.267332	0.196786	0.0500449	0.263081	0.162276	0.102607	0.0264023	0.0823513	0.157877	0.0877515	0.033186	0.160654	0.042235	0.0427741	0.0239008	0.0852043	0.0196305	0.0629454	0.0574548	0.0571418	0.0530266	0.0505054	0.0460723	0.0420621	0.0585293	0.0681172	0.0592276	0.0745343	0.0382345	0.0331222	0.0336195
595	18.448	582657	357.1	3-phosphoglyceric acid	95.4	0.00272138	0.00269964	0.00286623	0.00283472	0.00286162	0.00294771	0.00357274	0.00707797	0.00318188	0.00096473	0.00049061	0.00115105	0.0104597	0.00108998	0.000238767	0.0112983	0.0398006	0.00454369	0.00167465	0.0101223	0.00142819	0.00119595	0.00454167	0.00825088	0.00926141	0.00812318	0.00370859	0.00983791	0.00368807	0.00165889	0.00479826	0.00446397	0.00106047	0.00193787	0.00133462	0.00538849	0.00153703	0.00251182	0.00379252	0.0016404	0.00989226	0.00157595	0.00972836	0.00542719
597	18.472	582658	187.08	Ricinoleic acid	71.5	0.0010953	0.00112332	0.00104279	0.00109449	0.00122399	0.00109089	0.000146366	0.000125927	0.000251834	0.000395944	0.000307887	0.000584598	0.000325853	0.000400582	0.000285929	0.000347484	0.000370081	7.07331e-05	0.000329314	7.225e-05	0.0001514	0.000187501	0.000348061	0.000326129	0.000532159	0.000141841	0.000161645	0.000171324	0.000217579	0.000225732	0.000225203	0.000141506	0.00030757	0.000284839	0.000193638	0.000181185	0.000250444	6.44447e-05	0.000208326	0.000231303	3.93442e-05	0.000201443	0.000302022	0.000176332
600	18.502	582659	265.1	Hypoxanthine	97.1	0.00951709	0.00969623	0.0101723	0.0100393	0.0103956	0.0100732	0.0232006	0.00139907	0.0351529	0.00873407	0.00690684	0.00565415	0.135642	0.009708	0.00994767	0.00489961	0.0187383	0.0405924	0.00993549	0.000892663	0.000800598	0.00186719	0.0153714	0.0305133	0.0160427	0.00888461	0.00989645	0.00741606	0.0149891	0.0120813	0.0220259	0.0010817	0.00550963	0.0144638	0.0204438	0.0221009	0.0056817	0.00194461	0.0190096	0.0139693	0.00765031	0.0146531	0.00211046	0.0524247
602	18.507	582659	330.2	2,2'-biphenyldiol	68.6	0.000147833	0.000186821	0.000178687	0.000196409	0.00016971	0.000161362	3.12317e-05	0.000108727	0.000201747	0.000260352	0.000260558	0.00026169	0.000217795	0.000125925	0.000249806	0.000405098	0.000247528	0.000267733	0.000280694	0.000210217	0.000196762	0.000201973	0.000202837	0.000608872	0.00035389	0.000407128	0.000246797	0.000279582	0.000336845	0.000212932	0.00037642	0.000400067	0.000353357	0.000297774	0.000210731	0.000302664	0.000177682	0.000158731	0.000335999	0.000285267	0.000189592	0.000305966	0.000261806	0.000338356
604	18.546	582661	204.1	Shikimic acid	84.1	0.0153408	0.0152809	0.0155612	0.015613	0.0156549	0.0150154	0.00788534	0.020032	0.0240576	0.0430279	0.0326597	0.316516	0.0056216	0.123388	0.0852823	0.0530894	0.125442	0.0133192	0.0617151	0.00764756	0.0369141	0.0874002	0.0894316	0.0396678	0.0852128	0.0170766	0.0139946	0.0178162	0.0467447	0.00388468	0.0381412	0.0293462	0.0697315	0.0412141	0.020609	0.0257933	0.00414878	0.0148021	0.0394247	0.0474794	0.00987484	0.018906	0.0996979	0.017124
609	18.621	582664	273.1	Citric acid	99.3	0.647526	0.650438	0.656167	0.65498	0.659218	0.654817	0.317125	0.386744	0.324311	0.360859	0.400164	0.326782	0.262849	0.128993	0.298797	0.233719	0.264641	0.301191	0.266025	0.196469	0.278285	0.113469	0.283413	0.380787	0.33591	0.292925	0.369655	0.415119	0.425124	0.231211	0.272101	0.239266	0.325194	0.290271	0.281333	0.209451	0.331594	0.197976	0.301962	0.269332	0.271443	0.231239	0.276534	0.317757
614	18.728	582668	256.158	Citrulline	89.4	0.00425825	0.00474318	0.00482046	0.00496702	0.00523883	0.00534351	0.00183111	0.00314499	0.00322884	0.00422998	0.00723296	0.00358713	0.00349451	0.000956247	0.00245847	0.00493423	0.00128922	0.00392663	0.0038082	0.00281635	0.00242547	0.00342826	0.00166701	0.00852231	0.00352778	0.00235534	0.001951	0.00230914	0.00255975	0.00321572	0.00412657	0.001884	0.00289226	0.00326137	0.00215753	0.00211741	0.00304386	0.00186521	0.00337866	0.00349098	0.00678368	0.00305027	0.00374647	0.00409069
616	18.742	582668	290.106	N-acetyl-5-hydroxytryptamine	89.2	0.00252723	0.00358786	0.00407448	0.00336034	0.00498464	0.00500532	0.00688618	0.0126451	0.00330875	0.00186974	0.00285896	0.00388105	0.0037608	0.00253371	0.00316199	0.003365	0.00399128	0.00759546	0.00425958	0.00643503	0.00490156	0.00584689	0.00686402	0.00972695	0.00725794	0.00968146	0.0066553	0.00812369	0.00571789	0.0071779	0.00658975	0.006249	0.00769069	0.00695773	0.00586418	0.00480069	0.00897272	0.00875066	0.00753161	0.00710606	0.0133076	0.00482842	0.00800336	0.00758683
617	18.749	582669	260.2	Pinitol	89.8	0.000200545	0.000177441	0.000237764	0.000221282	0.000274605	0.000225491	0.000252808	0.000440561	0.00015245	0.000732375	0.000175238	0.000161466	0.000277511	0.000247131	0.000197172	0.000264479	0.000161661	0.000351106	0.00111499	0.000708203	0.000322035	0.000193531	0.00016166	0.00055954	0.000232769	0.000184547	0.000136975	0.000231057	0.000329506	0.000224468	0.000358965	0.000248172	0.000173133	0.000216091	0.000253788	0.000149039	0.000215972	0.000308007	0.00014224	0.000204484	0.000384772	0.000180092	0.000278548	0.00023249
619	18.779	582670	271.106	Trehalose-6-phosphate	72.3	3.86466e-05	6.29608e-05	0.000189067	0.000132679	0.000210273	0.00021193	0.000182899	9.71373e-05	0.000304275	0.000345137	0.000883112	0.00075825	0.000346836	0.00029716	0.000981949	0.000825853	0.000425369	0.000230291	0.00075755	0.000413565	0.00130331	0.000444917	0.000447296	0.00262679	0.00067609	0.00107114	0.0019771	0.00209059	0.00240661	0.000596545	0.00188156	0.0034182	0.00491266	0.00382697	0.00151902	0.00184407	0.0012704	0.000634265	0.00314007	0.00237159	0.000353503	0.00321825	0.00061626	0.00124196
625	18.906	582675	217.1	Xylofuranose	92.1	0.0379537	0.0371754	0.0386531	0.0378288	0.0390775	0.0385382	0.139212	0.202755	0.212112	0.354663	0.419151	0.288437	0.0820096	0.800808	0.694128	0.297068	0.691096	0.864159	0.659384	0.119415	0.307962	0.477314	0.444923	0.278749	0.665884	0.231303	0.294557	0.201616	0.38791	0.184711	0.396257	0.264416	0.293193	0.261461	0.325948	0.358868	0.262741	0.236466	0.361644	0.389861	0.25973	0.418174	0.119854	0.288412
626	18.917	582675	157.1	Sophorose	89.5	0.00434594	0.00321731	0.00349462	0.00435047	0.00340936	0.00369264	0.0102225	0.00627657	0.00779685	0.0136153	0.021913	0.00937344	0.0025817	0.0160734	0.0136908	0.00990324	0.0139815	0.0273134	0.023728	0.00341871	0.0101456	0.016747	0.0240322	0.00857356	0.0378229	0.00686837	0.00567557	0.00355274	0.0240901	0.00680399	0.0129503	0.0124459	0.0156441	0.00815857	0.00973045	0.0115009	0.00896056	0.00678294	0.0176413	0.0158155	0.00717664	0.024675	0.00559577	0.00611714
628	18.946	582676	204.1	Methyl alpha-d-glucofuranoside	94	0.00310624	0.00308207	0.00313688	0.00317237	0.00338633	0.00309718	0.0391051	0.0112255	0.0137754	0.0855723	0.0894161	0.018903	0.00250016	0.115128	0.0974371	0.0705814	0.0948734	0.056435	0.0942956	0.00468031	0.0761452	0.0703162	0.103358	0.0163624	0.153105	0.0188576	0.0370088	0.0242802	0.119318	0.0230974	0.0513492	0.0546665	0.0682007	0.0690159	0.0683597	0.0494691	0.0361282	0.0137776	0.0745362	0.127683	0.00856346	0.138927	0.0109493	0.0372451
632	18.996	582678	173.1	Dehydroascorbic acid	83	0.00245499	0.000256952	0.00247667	0.00251086	0.00238901	0.0025092	0.00179303	0.00435258	0.00244963	0.00227491	0.00266166	0.0052546	0.00173189	0.00320259	0.00289761	0.00186024	0.00148089	0.00363339	0.00350874	0.000248718	0.00307719	0.0043986	0.00351696	0.000808319	0.00267667	0.00547667	0.00474773	0.00110582	0.0015794	0.00248658	0.00465181	0.00354068	0.0042385	0.00269698	0.00487166	0.00320058	0.00175249	0.00301236	0.004014	0.00227191	0.00191497	0.00415401	0.00335837	0.0035747
633	19.005	582679	295.075	Coniferin	77	0.00071929	0.000800826	0.00105685	0.00125991	0.00121431	0.00188548	0.000599222	0.000693154	0.000590978	0.00089628	0.000848829	0.000843687	0.000631495	0.000653167	0.000540343	0.000783387	0.000718556	0.000532217	0.000691598	0.000623205	0.000779455	0.000760987	0.000921981	0.00121216	0.0012322	0.00111833	0.00109062	0.00110332	0.000890712	0.000721858	0.00100787	0.00089742	0.000878776	0.000716442	0.00121816	0.000891504	0.000663774	0.000693836	0.000798341	0.000760051	0.000830476	0.000938546	0.000928118	0.000947064
636	19.028	582680	206.1	Hippuric acid	84.8	0.00908132	0.00935229	0.00956766	0.0099941	0.00986725	0.00983763	0.00750747	0.0144692	0.0105525	0.0318527	0.00882823	0.0167498	0.0131627	0.0110461	0.0106785	0.018632	0.0233616	0.0142002	0.0117959	0.0110033	0.0107806	0.0168459	0.01661	0.00658215	0.01202	0.0157978	0.0164911	0.0173412	0.00522662	0.00919611	0.0217845	0.014005	0.0139958	0.0081756	0.0740533	0.0190824	0.0125137	0.0264011	0.0171423	0.00819259	0.00776888	0.0131398	0.00971344	0.0132497
637	19.045	582680	217.1	1,5-anhydroglucitol	92.3	0.218364	0.219758	0.222407	0.220728	0.225797	0.223097	0.142516	0.461633	0.209578	0.994658	0.264688	0.489296	0.0923	0.336472	0.267639	0.592245	0.693746	0.34741	0.349321	0.275235	0.240289	0.445966	0.318921	0.205249	0.343392	0.48863	0.464364	0.545871	0.10947	0.230538	0.469425	0.348907	0.342441	0.240523	0.46535	0.308333	0.122359	0.3051	0.406331	0.226837	0.192945	0.400383	0.289606	0.33705
638	19.09	582682	263.1	D-fructose-1-phosphate	71.1	0.000407905	4.54758e-05	0.000462095	0.000436543	1.30165e-05	0.000498752	0.00038088	0.000856111	0.000453555	0.00176375	0.000562703	0.00138521	0.000271062	0.000681316	0.000119833	0.00104116	0.00129762	0.00077229	0.000749753	0.000605172	0.000106383	0.000898218	0.000740548	0.000483883	0.000825646	0.000873199	0.00081659	0.00103943	4.87151e-05	0.000426008	0.00085795	0.000698882	0.000671702	0.000495582	0.000855288	0.000541057	0.000274018	2.36569e-05	0.000756771	0.000460412	2.74659e-05	0.000759289	0.000644287	0.000623727
639	19.092	582682	285.2	Myristic acid	98.5	0.0107117	0.0108966	0.0113065	0.011529	0.0114623	0.0112987	0.0300828	0.016608	0.00991284	0.0192315	0.0207676	0.00724321	0.00822836	0.013062	0.0160703	0.00671086	0.0136545	0.00805059	0.00606291	0.0107388	0.0142202	0.00759623	0.00616003	0.0200464	0.0246928	0.0167704	0.0179913	0.00907439	0.00800695	0.0121433	0.0120513	0.01198	0.0116703	0.0116688	0.0147941	0.00861359	0.0196487	0.010882	0.0159305	0.0156516	0.0112113	0.00959842	0.011604	0.0100028
640	19.121	582683	345.186	Quinic acid	82.6	0.000735982	0.000685138	0.000755222	0.000733548	0.000774392	0.000788117	0.00427437	0.000102166	0.000593986	0.0028833	0.00115758	0.00203593	0.00271876	0.000696394	0.000600422	0.000145215	0.000372436	0.00129765	0.000345376	0.00120368	0.00047194	0.000150699	0.00130474	0.000835516	0.000362993	0.00160967	6.53666e-05	0.00016878	0.00168463	2.97919e-05	0.000821761	0.00044987	4.88181e-05	0.000929805	0.00233082	9.324e-05	0.00213924	0.00145266	0.000404238	0.00103298	0.0027689	0.000794337	0.00121253	0.00111315
641	19.145	582684	245.082	2,4-dihydroxy-pentanedioic acid	73.9	0.00147183	0.00152343	0.00161269	0.00154974	0.00156098	0.00142217	0.00148271	0.00334222	0.00163393	0.00146217	0.00183751	0.0162105	0.00654992	0.00193146	0.0014294	0.00300775	0.00991272	0.00258465	0.00436212	0.00268681	0.0019936	0.00151428	0.0104591	0.00448861	0.003572	0.00164232	0.000760659	0.00466831	0.00285633	0.000408872	0.00122289	0.00103042	0.00166553	0.00099406	0.000550061	0.00138637	0.00035315	4.46843e-05	0.000888926	0.000808561	0.00185385	0.000784067	0.00208873	0.00153916
642	19.191	582686	259	1-methyladenosine	72.6	8.15843e-05	5.5843e-05	4.94944e-05	8.57102e-05	0.000123697	0.000128803	9.75395e-05	7.10483e-06	0.000109458	0.000340716	0.000171409	3.80632e-05	9.79116e-05	6.66616e-05	6.03181e-05	7.44467e-05	7.48934e-05	5.17447e-05	8.27799e-05	2.90479e-05	4.37404e-05	0.000305247	7.01052e-05	4.31908e-05	0.000349601	9.79703e-05	0.00010655	2.42419e-05	0.000109052	6.41523e-05	0.000109337	7.22256e-06	0.000134923	5.57236e-05	0.000235013	4.98585e-05	4.03452e-05	0.000142238	6.8741e-05	0.000170581	0.000100266	2.98334e-05	7.74804e-05	0.000121037
643	19.197	582686	309	Adrenaline	87.3	0.00227499	0.00234352	0.00234191	3.3074e-05	3.02466e-05	1.8264e-05	6.37081e-05	0.00283412	0.00365844	0.0061856	0.00503296	0.000982374	0.000378891	0.000101204	0.00427683	0.000466722	7.12929e-05	0.00507059	0.00877318	5.92898e-05	0.000216452	0.0056728	0.0113079	0.000291311	8.43754e-05	3.16579e-05	0.00158075	0.000630269	0.000199671	0.00151493	0.00011806	0.00213728	3.98297e-05	0.00178773	0.00251298	0.00193663	1.64116e-05	0.000855302	1.47835e-05	0.00334414	0.000215915	0.00251137	9.23878e-05	0.000235439
645	19.222	582687	298	Glucose-1-phosphate	77.5	0.000196984	0.000218859	0.000304411	0.000233632	0.000235336	0.000369474	0.000426032	0.000276997	0.000425416	0.000300922	0.000410302	0.000362595	0.000662579	0.00017324	0.000236564	0.000331271	0.000358447	0.000320526	0.000364433	0.0002779	0.000310464	0.000281543	0.00027699	0.000816116	0.00046752	0.000411587	0.000384693	0.000447491	0.00244642	0.000362	0.000430791	0.000442404	0.000435335	0.000471466	0.000265624	0.000383004	0.000322947	0.000225844	0.000379183	0.000371825	0.000236637	0.000397458	0.000421646	0.0003823
646	19.264	582689	276.2	Isochlorogenic acid	68.5	0.000136848	0.000239642	0.000176306	0.000288248	0.000310945	0.000392597	0.000591637	0.000414847	0.000291963	0.00067823	0.000477149	0.000270039	0.000230756	0.000703739	0.000474872	0.000643846	0.000819831	0.000551842	0.0012096	0.000214642	0.000400397	0.000772224	0.00102713	0.000371651	0.000977049	0.000415796	0.000174244	0.000272542	0.000336842	0.000224052	0.000405679	0.000190742	0.000283085	0.000237598	0.000338258	0.000243683	0.000159199	0.00018173	0.000260871	0.000331781	0.000176815	0.000228027	0.000308439	0.000371389
647	19.266	582689	117.1	L-sorbose	96.2	0.00288667	0.00292465	0.00305473	0.00287489	0.00312753	0.00307014	0.00616922	0.00347534	0.00481501	0.00798357	0.00641904	0.0102538	0.00229162	0.00873521	0.00535313	0.00572174	0.00763659	0.00722196	0.0106655	0.00260387	0.00331622	0.00765433	0.0135019	0.00502533	0.0103755	0.00403477	0.00225294	0.00312084	0.00440101	0.00210814	0.004426	0.0027218	0.00310564	0.00243079	0.00341089	0.00265424	0.00144379	0.00115414	0.00298741	0.00447936	0.00145392	0.00319406	0.00495526	0.00384795
650	19.342	582692	87.1	Cellobiose	69.1	0.0011698	0.000283008	0.00117173	0.000225358	0.0012782	0.00127503	0.00167993	0.000898686	0.000508424	0.00116345	0.00115377	0.00100681	0.000146978	0.001527	0.00146283	0.0013664	0.00196663	0.00178916	0.00217621	0.000772692	0.000893453	0.00148463	0.000837071	0.00129644	0.00170025	0.000779851	0.000791036	0.000358589	0.00106429	0.000914795	0.00114394	0.000881254	0.000437673	0.000659951	3.71701e-05	0.000831632	0.000343387	0.000894676	0.000469555	0.00112303	0.000703528	0.000977743	0.00175323	0.000933133
655	19.423	582695	217.1	D-ribose	90.7	0.0372812	0.0171817	0.0173788	0.037749	0.0385445	0.0382649	0.057415	0.000535091	0.0517277	0.104723	0.0961	0.0919447	0.0224006	0.151791	0.122699	0.0687725	0.137863	0.188787	0.152066	0.0164403	0.074647	0.129834	0.134475	0.0548486	0.187299	0.0516756	0.0378074	0.0213982	0.0994755	0.0519993	0.0709386	0.0498159	0.0551227	0.0623015	0.0679835	0.0448694	0.0484091	0.0408169	0.0763056	0.069017	0.0533355	0.0534216	0.0507363	0.0476248
657	19.444	582696	103.1	2-monoolein	79.7	0.0302505	0.030282	0.0303618	0.0306301	0.0314423	0.0308464	0.0419175	0.0375022	0.0466271	0.0354328	0.0781557	0.102048	0.0159416	0.0586612	0.0940333	0.060739	0.0751121	0.116718	0.125088	0.0140813	0.0540293	0.070052	0.122437	0.0489744	0.138911	0.0158025	0.0138334	0.0313062	0.0639751	0.0412958	0.0259204	0.0363242	0.0386925	0.0347514	0.0223668	0.0169258	0.0286799	0.022255	0.0453299	0.0535307	0.0297645	0.0404624	0.0391041	0.0145154
658	19.451	582696	319.195	Glucose	96.7	0.11177	0.113218	0.114909	0.11387	0.116096	0.116359	0.159861	0.0359722	0.0465015	0.13653	0.105863	0.0967528	0.0467509	0.21863	0.182771	0.0680933	0.237359	0.210676	0.176851	0.0440345	0.0898509	0.225627	0.11173	0.048437	0.211601	0.0577086	0.0370712	0.0335366	0.0971175	0.094402	0.0735121	0.0450818	0.0485869	0.0449867	0.0704741	0.0446831	0.0558934	0.0322629	0.0709991	0.0708901	0.0497983	0.0558867	0.129264	0.0523147
664	19.538	582700	179.1	Nicotinic acid	76.6	0.0149605	0.0129576	0.0132128	0.0121569	0.0118531	0.0122351	0.0298383	0.0360171	0.0194942	0.0185506	0.0106362	0.0130732	0.0184074	0.0117702	0.0106459	0.00798658	0.0105939	0.015775	0.0111732	0.0150235	0.011456	0.0208501	0.0126924	0.0200441	0.0172375	0.0164929	0.00697358	0.00982697	0.00765696	0.0131441	0.0123223	0.00730641	0.00937182	0.00718184	0.00678232	0.00833372	0.0089082	0.00835132	0.00599709	0.00526545	0.0120854	0.0048431	0.0167197	0.0123996
668	19.619	582703	204.2	Altrose	86.3	0.00513721	0.00548098	0.311936	1.21194	1.46717	1.4609	2.60018	3.2676	3.01871	4.26413	4.28809	3.97473	0.0152243	0.250228	4.34819	3.7041	4.92166	6.32903	5.08546	0.025337	3.85547	4.29064	4.7051	3.37701	5.44113	0.0385048	0.0445367	0.0241938	4.24862	0.0150919	3.88354	0.0609563	0.0592274	0.0592263	3.61396	0.0475592	0.0374898	0.0483293	3.89771	0.0824664	3.47233	3.32011	3.00047	0.0343115
671	19.643	582704	208.1	Delta-tocopherol	77.9	0.00736755	0.053395	0.000451376	0.0518995	0.0514513	0.0512891	0.0113584	0.00631972	0.0131478	0.0200944	0.0214854	0.0139708	0.0140345	0.0765118	0.00983263	0.0158836	0.0846749	0.101119	0.0994573	0.0071224	0.0178035	0.0573734	0.0850983	0.029515	0.100563	0.0244484	0.0217691	0.0267611	0.0197272	0.0210349	0.0270718	0.0222292	0.0232229	0.0174779	0.0157111	0.0156626	0.0135186	0.00734956	0.0186196	0.0170421	0.00513541	0.0202048	0.0261724	0.0226082
674	19.662	582704	283.233	Syringic acid	61.3	0.000195987	0.000246488	0.000353822	0.000312192	0.000250694	0.000271348	0.000470026	0.000416237	0.000490045	0.000676829	0.000738205	0.000461526	0.000541861	0.000422625	0.000397736	0.000613042	0.00050752	0.00039117	0.000564309	0.00033403	0.000659468	0.000423175	0.000473187	0.00110343	0.000477283	0.000813844	0.000819416	0.000879058	0.000680311	0.000751863	0.000797529	0.000732341	0.000741352	0.000547521	0.000607443	0.000537194	0.000618353	0.000331286	0.000539244	0.000632714	0.000263619	0.000672732	0.000864189	0.000604272
678	19.725	582707	319.2	Sedoheptulose	89.8	1.36962	1.36006	1.37766	1.36116	1.36881	3.28296e-05	1.13797	0.637977	1.05558	1.60423	1.493	1.42128	0.000125829	1.39843	1.09662	1.3035	1.55993	2.73609	2.16645	0.578843	1.09174	1.61526	1.74896	0.890933	2.14064	0.770945	0.423203	0.517545	1.22612	1.08067	1.17558	0.576915	0.742482	0.672587	1.08019	0.618633	0.842832	0.449663	0.960263	0.9931	0.707545	0.867226	1.33657	0.782388
682	19.797	582710	465.2	Glucaric acid gama-lactone	81.7	0.00197804	0.00213728	0.00209034	0.00209123	0.0021605	0.00205332	0.00167432	0.000907979	0.00161818	0.00261512	0.00244082	0.00237366	0.00083281	0.00266687	0.00204181	0.00201148	0.00254639	0.0048968	0.00392873	0.000907681	0.00174775	0.0026215	0.00279131	0.00124301	0.00384106	0.00116684	0.000611961	0.000755927	0.00183494	0.00152523	0.00171178	0.000873294	0.00128353	0.0011012	0.00163216	0.000907025	0.00137281	0.000676579	0.00152881	0.00154478	0.000983783	0.00124685	0.00210886	0.00109881
689	19.913	582714	154.1	L-histidine	87.8	0.0686192	0.0838295	0.0819951	0.0814041	0.0937882	0.0899301	0.0122856	0.0317879	0.0405387	0.0183535	0.0282611	0.015336	0.101941	0.00509684	0.00802334	0.0380387	0.0142249	0.0981125	0.0379655	0.0653654	0.0290325	0.0217244	0.0131315	0.0651367	0.01316	0.0864923	0.0400445	0.0474982	0.050976	0.0735544	0.0708358	0.0527977	0.0357893	0.0325372	0.0376287	0.0345192	0.0756487	0.0562972	0.0506085	0.0399025	0.102022	0.0435873	0.0814603	0.0493556
690	19.934	582715	174.1	L-lysine	95.1	0.219402	0.224667	0.226943	0.225038	0.23373	0.227166	0.111047	0.162913	0.193562	0.105114	0.133376	0.0634096	0.209467	0.0342836	0.0805518	0.128666	0.0788946	0.234911	0.0944167	0.190958	0.10255	0.176075	0.0732786	0.275321	0.0979414	0.276038	0.120196	0.173627	0.132278	0.196916	0.19154	0.142247	0.123695	0.0988056	0.122756	0.117761	0.148975	0.141643	0.146588	0.118934	0.253544	0.149927	0.194718	0.184753
693	19.95	582716	319.2	Sorbitol	98.5	0.333465	0.335059	0.340266	0.336038	0.339973	0.338441	0.0156908	0.168944	0.0241513	0.018772	0.0208986	0.147218	0.045766	0.0346839	0.0295587	0.0210206	0.0122265	0.0359933	0.0314043	0.0367981	0.0277068	0.0289636	0.0186701	0.213169	2.07107	0.0337392	0.0150204	0.0208023	0.0261209	0.0234785	0.0246538	0.017147	0.0157786	0.0148656	0.0149172	0.0139338	0.0166743	0.0192773	0.00181757	0.0182063	0.0302574	0.0172654	0.0274989	0.022327
694	19.952	582716	362.2	Maltitol	87.8	0.00229049	0.00227096	0.00236235	0.00227305	0.00246774	0.00239654	0.0278271	0.0159522	0.033416	0.0483867	0.0574168	0.0395148	0.062411	0.0641885	0.0642045	0.0766658	0.070583	0.015277	0.0572497	0.0167581	0.045477	0.0407398	0.101088	0.15223	0.0564201	0.0768315	0.0688868	0.0789307	0.0504557	0.0206818	0.0539972	0.0678904	0.035112	0.0186392	0.0239308	0.0264929	0.00823768	0.0218405	0.0379871	0.0173924	0.00443125	0.0165846	0.022086	0.0319915
696	20.027	582719	275.1	2-o-methyl-gluconic acid	77.4	0.00027682	0.000311098	0.000281183	0.000267112	0.000278582	0.000271821	0.000243028	0.000744288	0.000191069	0.000298371	0.000211878	0.000630123	0.000502984	0.000504236	0.000316799	0.000220508	0.000272804	0.000249814	0.000251964	0.000635262	0.000254724	0.000167871	0.000530454	0.000423594	0.000227871	0.000550688	0.000194798	0.000295906	0.000195204	0.000250063	0.000377602	0.0002369	0.0001612	0.000213258	0.000308002	0.000226223	0.000255744	0.000166097	0.000265108	0.000252549	0.000402991	0.000294352	0.000436928	0.00033474
700	20.122	668723	333.133	Galacturonic acid	83.1	0.00081914	0.000132802	0.000902596	0.000114305	0.000942314	0.000120012	0.0019737	0.000308607	0.000158241	0.00608734	0.00119315	8.28662e-05	0.00278619	0.00253075	0.00093125	0.00138922	0.00136902	0.000132728	0.00192216	0.000179376	0.00113927	0.00135558	0.00427697	0.00283477	0.000534484	0.00013251	6.52549e-05	0.00070776	0.00116945	0.000752522	0.00119793	0.000767419	0.000123662	0.000621033	0.000824339	0.000595042	0.00039079	0.000625849	0.000702183	0.000139975	0.000481268	0.000794784	0.00118924	0.000667363
701	20.124	668723	218.1	L-tyrosine	91.7	0.195637	0.201796	0.207512	0.209413	0.213207	0.211605	0.206085	0.316113	0.199389	0.206409	0.212093	0.108911	0.214721	0.0987944	0.106266	0.197523	0.176	0.241847	0.23088	0.24325	0.162926	0.446346	0.242117	0.399426	0.164894	0.321251	0.131802	0.196806	0.210531	0.267151	0.221587	0.154553	0.175849	0.115008	0.176543	0.157	0.167361	0.172103	0.208071	0.142912	0.302996	0.148211	0.250174	0.208414
710	20.281	668732	217.1	Melezitose	93.7	0.0739923	0.0762207	0.077022	0.0756237	0.0777702	0.0773144	0.056698	0.0288	0.053315	0.0873806	0.0775077	0.0663815	0.0275289	0.0758	0.0534041	0.0680383	0.0838664	0.227274	0.148091	0.0275176	0.0534561	0.092624	0.101598	0.0427706	0.13016	0.0375681	0.0205703	0.0249059	0.0654003	0.0521423	0.0580613	0.0286443	0.0368188	0.0337159	0.0558867	0.0298915	0.0409229	0.0209647	0.0484001	0.0507625	0.0320953	0.0445042	0.051292	0.0364976
711	20.294	668732	156.098	N-(1-methyl-2-{4-[(1-methylethyl)sulfanyl]phenyl}-2-hydroxy]ethyl)octan-1-amine	72.1	0.00379212	0.00371702	0.00380079	0.00381434	0.00410326	0.00400398	0.00545121	0.00468865	0.00604333	0.00389813	0.00475504	0.00888143	0.00361146	0.00188292	0.00364808	0.00270761	0.00297721	0.0039022	0.00397033	0.00452295	0.00252333	0.00222838	0.00599231	0.00401598	0.00445642	0.00542009	0.00358254	0.00445878	0.00519206	0.00290379	0.00277313	0.00351496	0.00587848	0.00420198	0.00380223	0.002561	0.00285563	0.00226904	0.00471931	0.00268052	0.0026101	0.00464254	0.00284428	0.00431924
714	20.392	668738	237.1	Theobromine	75.4	0.000549568	3.16871e-05	0.000302545	0.000715489	0.00038782	0.000326452	3.52467e-05	0.00011978	4.52428e-05	2.99475e-05	3.56698e-05	0.00124935	0.00174712	2.2794e-05	3.48245e-05	2.3345e-05	2.05284e-05	4.91908e-05	5.05769e-05	6.64451e-05	1.85435e-05	0.000624756	0.000110899	0.000127941	4.40265e-05	0.000399945	4.3673e-05	5.10692e-05	0.000366704	6.72721e-05	0.00093913	0.00769256	0.00125499	4.77676e-05	0.00515668	0.000887978	0.000577552	0.000159642	0.000623669	8.25994e-05	0.000310343	5.73982e-05	0.0009875	4.618e-05
715	20.392	668738	202.1	Indoleacetic acid	90.8	0.00426099	0.00410337	0.00453875	0.00450975	0.00453261	0.00440981	0.00370839	0.0046603	0.0083914	0.00178365	0.00545602	0.00429172	0.00653225	0.00759584	0.00760453	0.000305195	0.00161686	0.0063348	0.0164279	0.00594611	0.0107416	0.00593007	0.0108113	0.0231136	0.00805867	0.00774586	0.00801224	0.016297	0.0905454	0.00690287	0.00392278	0.00367202	0.0052347	0.00317741	0.00475193	0.00549317	0.00222916	0.00255299	0.00591997	0.00258423	0.00543786	0.00935188	0.00330704	0.00452632
722	20.489	668743	147.1	Digalacturonic acid	87.7	0.386695	0.394907	0.398349	0.398455	0.399963	0.399216	0.746701	0.964106	0.90231	1.38405	1.34074	1.24842	0.426008	1.58625	1.42088	1.12605	1.57585	1.96504	1.60787	0.642669	1.22184	1.34116	1.50007	1.07043	1.67006	0.860111	0.827172	0.702737	1.37952	0.757323	1.17475	1.03377	1.19256	1.10283	1.10612	0.955036	0.917104	0.987262	1.24345	1.20455	1.07205	1.01051	0.883659	0.865028
724	20.491	668743	204.173	Galactose	98	1.37846	1.39061	1.39647	1.39668	1.37471	1.38895	2.24503	2.77107	2.61009	3.64765	3.58358	3.3539	1.55969	4.10049	3.76354	3.03881	4.11944	5.02324	4.19182	2.11259	3.30877	3.54815	3.94513	2.94607	4.31475	2.51894	2.4272	2.16229	3.67082	2.24745	3.21938	2.85759	3.23507	3.02173	3.07395	2.74559	2.61982	2.79377	3.39002	3.29222	2.95731	2.82479	2.54466	2.5724
725	20.515	668744	443.2	2,4,6-trihydroxybenzoic acid	76	2.66351e-07	4.08018e-06	2.66351e-07	2.66351e-07	2.66351e-07	4.33464e-06	5.05664e-06	4.57802e-05	2.66351e-07	2.66351e-07	2.66351e-07	2.66351e-07	2.66351e-07	2.66351e-07	2.66351e-07	1.80206e-05	5.40405e-06	5.97205e-06	2.66351e-07	2.66351e-07	2.66351e-07	2.66351e-07	2.66351e-07	5.45821e-05	2.66351e-07	2.66351e-07	2.66351e-07	4.56712e-06	5.12329e-06	4.68824e-06	1.98565e-05	2.66351e-07	4.77488e-06	4.45011e-06	2.66351e-07	2.66351e-07	2.66351e-07	9.3217e-06	5.17893e-06	2.66351e-07	2.66351e-07	2.66351e-07	2.66351e-07	2.66351e-07
726	20.528	668745	385.122	2-amino[1,3]thiazolo[4,5-d]pyrimidine-5,7-diol	69.8	0.00027912	0.000300399	0.000311362	0.000303172	0.000337724	0.00034396	0.000265762	0.00244424	0.00270059	0.00149079	0.00184657	0.000900837	0.000191205	0.00044983	0.00211714	0.00224691	0.00150864	0.00145519	0.000890247	0.00158787	0.000390723	0.000932506	0.000879373	0.00201862	0.0006027	0.00128888	0.00111089	0.000347888	0.00150027	0.000310794	0.000924289	0.00235829	0.00175174	0.000704459	0.00132399	0.0007412	0.000182459	0.00172856	0.00107709	0.000715541	0.00347841	0.00197682	0.00196229	0.000705971
728	20.56	668746	261.117	1,2-cyclohexanedione	69.6	0.000730439	0.00076277	0.000771245	0.000854388	0.000830714	0.000818058	7.22449e-05	6.15769e-05	0.000100742	4.42273e-05	3.96272e-05	0.000182992	8.36967e-05	8.33728e-05	2.61873e-05	9.62485e-05	8.77908e-05	0.00283249	0.00208555	0.000278921	0.00135152	0.00167348	8.46017e-05	6.73887e-05	0.00218156	0.0010318	0.000875377	2.54633e-05	0.0015308	2.39411e-05	0.00012855	8.49559e-05	0.00128089	2.97722e-05	8.84082e-05	5.64485e-05	2.73913e-05	8.34816e-05	7.52776e-05	0.0013145	0.000122752	0.000108131	0.000214425	6.72496e-05
731	20.681	668753	318.2	Isohexonic acid	86.8	0.000120745	0.000209748	0.000303777	0.000294981	0.000180397	0.000283621	0.000312411	0.000161094	5.62349e-05	0.000102595	0.000138936	0.00020175	0.000228354	0.000594596	0.000254166	0.000123164	0.000539911	0.000672535	0.000681188	0.000189174	0.000140436	0.00011959	0.000158569	0.000129868	0.000208068	0.000150131	0.000121498	0.00117868	0.000126033	7.31551e-05	0.000132181	0.00039241	0.000180525	8.65602e-05	0.000209629	0.00120756	0.000719125	7.13658e-05	9.49096e-05	8.74467e-05	0.000105946	8.24695e-05	0.000108882	0.00303064
732	20.693	668754	292.1	Gluconic acid	98.6	0.00364727	0.00365086	0.00386453	0.00393359	0.00400344	0.00403417	0.00276011	0.00564237	0.0044632	0.00479409	0.00481562	0.0159892	0.0136672	0.00445642	0.00682789	0.00598685	0.00571055	0.0143064	0.00905338	0.00696243	0.00336104	0.00393201	0.00787007	0.00911039	0.0360658	0.00382057	0.00247037	0.00288482	0.00578739	0.0030939	0.00382486	0.00234431	0.00335449	0.00504254	0.00359675	0.00205979	0.00239049	0.002313	0.00300337	0.0035425	0.00238167	0.00254643	0.00407592	0.00274431
733	20.722	668755	395.2	Dimethyluric acid	66.4	7.4863e-05	6.94487e-05	8.38182e-05	9.11174e-05	8.25513e-05	6.88879e-05	0.000211295	0.00196202	0.000121838	0.000154127	0.000138348	0.00025796	0.000188962	6.4098e-05	0.000128239	0.00127175	0.000665362	0.00104463	0.000126771	7.54241e-05	0.000152417	0.000218288	0.000163641	0.00148572	0.000631665	0.000230611	4.56205e-05	0.000117127	0.000115354	0.000308818	0.00128689	0.000117508	6.78319e-05	9.20321e-05	5.32662e-05	6.40882e-05	3.27168e-05	0.000640833	0.000102389	9.30413e-05	8.41713e-05	8.15121e-05	0.000172753	0.00012616
740	20.882	668763	299.085	Uridine 5'-monophosphate	77.5	0.00102063	0.00239666	0.00179584	0.00153692	0.00212977	0.0021822	0.00055509	0.000592395	0.00208198	0.00112426	0.00208845	0.00261565	0.00188292	0.00186751	0.00188331	0.00249762	0.00222344	0.00243784	0.00270307	0.00365688	0.00347441	0.00329787	0.00345673	0.00419396	0.00371624	0.00337329	0.00236462	0.0035649	0.00250278	0.00246413	0.0026979	0.00264702	0.00311659	0.00290955	0.00214956	0.00190997	0.00236657	0.00260786	0.00298575	0.00249107	0.00308232	0.00198144	0.00221123	0.00403898
741	20.882	668763	318.125	D-ribose-5-phosphate	75.4	8.77772e-05	0.000105885	0.000147624	0.000118401	0.000127902	0.000101441	0.00015113	0.00020871	0.000116546	0.000179371	0.000219051	0.000422569	0.000235074	0.000289003	0.000166875	0.00024715	0.000251483	0.000306146	0.000208417	0.000166337	0.000124744	0.000188542	0.000341962	0.000263761	0.000260613	0.000201844	0.000181876	0.00019176	0.000203248	0.000114314	0.000194131	0.000158724	0.000158382	0.000129246	0.000206143	0.000132672	0.000136835	9.08965e-05	0.000140962	0.000141608	0.000156827	0.000141897	0.000148013	0.000146234
742	20.898	668764	217.1	Beta-d-glucopyranuronic acid	96.3	0.001872	0.0126276	0.0130752	0.00203303	0.00179187	0.0145059	0.00352408	0.00422071	0.00222476	0.00446105	0.00515817	0.00598564	0.00505463	0.0134838	0.00416232	0.00408917	0.00535382	0.0092158	0.00757222	0.00382169	0.00393839	0.00504748	0.0158706	0.00723275	0.00810672	0.00228484	0.00243924	0.00229423	0.00534033	0.00270527	0.00360085	0.00293986	0.00281975	0.00242781	0.00352632	0.00207146	0.00159649	0.00238149	0.00314127	0.00349313	0.00245812	0.00363627	0.00204546	0.00188093
743	20.925	668766	353.13	Xanthine	82.7	0.000853532	0.000778782	0.000834449	0.000840808	0.000894517	0.00099835	0.00193942	0.000693475	0.000881297	0.00132395	0.00124283	0.0005705	0.00171609	0.000555798	0.000958425	0.000802633	0.00188118	0.00241512	0.00127244	0.00173176	0.000705945	0.00143338	0.00148951	0.00318182	0.00168039	0.00179547	0.00171617	0.00158085	0.00109275	0.00118935	0.00190542	0.000735484	0.00110587	0.000942363	0.00121464	0.00111694	0.000931392	0.000923038	0.00213892	0.00121042	0.00139199	0.00100553	0.00148069	0.00184403
747	21.038	668772	117	Palmitelaidic acid	98.8	0.00733758	0.00756168	0.00745348	0.00761388	0.00774712	0.00758196	0.0379014	0.0101473	0.00694508	0.0475145	0.0248868	0.00489954	0.0049128	0.0167334	0.0224253	0.00476713	0.0179958	0.00680064	0.00493425	0.00649108	0.016773	0.00651945	0.00434942	0.0171423	0.0306565	0.0148179	0.0279665	0.0109485	0.00490032	0.00813411	0.0120777	0.0124198	0.0139132	0.010443	0.0188353	0.00580052	0.0158421	0.00892606	0.0138732	0.0197459	0.00705683	0.0125109	0.00968705	0.00847071
751	21.094	668775	174.1	Glycyl tyrosine	72.3	0.000753496	0.0016473	0.00157995	0.00184098	0.00173992	0.00179985	0.00214054	0.0011158	0.00161268	0.00142563	0.00186167	0.00168241	0.0016273	0.00136065	0.00164292	0.00152002	0.00183784	0.00188685	0.00244493	0.00369583	0.00230691	0.00173234	0.0021493	0.00308865	0.00283492	0.00279513	0.00244343	0.00256852	0.00319127	0.00185352	0.00299206	0.00209285	0.00357375	0.00260143	0.00305667	0.00244046	0.00213063	0.00228576	0.00296572	0.00223902	0.00295074	0.00280107	0.00431031	0.00260449
752	21.129	668777	333.183	Galactaric acid	97.4	0.000151238	5.4558e-05	3.97195e-05	1.8198e-05	4.14311e-05	2.78646e-05	0.000330745	0.000537003	5.91377e-05	9.14152e-05	0.00034886	0.000241644	5.58031e-05	0.000178459	0.000384571	0.000989263	0.000625029	8.28154e-05	0.000340059	0.000447623	0.000418407	7.48155e-05	7.16416e-05	0.000537095	0.000290221	0.000140125	4.58948e-05	0.000405572	0.00015494	0.000361082	4.19323e-05	0.000583724	4.87463e-05	5.52098e-05	3.74067e-05	0.000488959	0.000392166	0.000136487	5.24258e-05	0.000100713	5.13092e-05	7.49262e-05	0.000678301	0.000382861
753	21.173	668779	331.15	Alloxanic acid	81.7	0.000916433	0.00106756	0.00129938	0.00156927	0.00167592	0.00199913	0.0015013	0.00242278	0.00211713	0.00157445	0.00159951	0.00138718	0.0013076	0.00137396	0.00142197	0.00231679	0.00181752	0.00208159	0.0016057	0.00169224	0.00159035	0.00164012	0.00147245	0.00287226	0.00167451	0.00226916	0.00179066	0.00191123	0.00192266	0.00159248	0.00267534	0.00207462	0.00215457	0.00180347	0.00200506	0.00193299	0.00146643	0.00238221	0.00187088	0.00174901	0.00209401	0.0017613	0.00237427	0.00215009
755	21.229	668782	117	Palmitic acid	99.9	0.184098	0.189983	0.193728	0.203312	0.19944	0.20057	0.591249	0.237101	0.175906	0.45219	0.482673	0.186344	0.183015	0.286658	0.310849	0.116062	0.383001	0.179178	0.108304	0.178359	0.361844	0.126207	0.104119	0.343696	0.610508	0.372106	0.401676	0.211222	0.189022	0.209019	0.225828	0.219601	0.185346	0.245427	0.302914	0.151853	0.321712	0.214405	0.29966	0.293401	0.170381	0.181075	0.188	0.208646
762	21.42	668792	147.1	Isomaltose	81.1	0.00265836	0.00291354	0.00243308	0.00262433	0.00299791	0.00277676	0.020297	0.00517986	0.0583681	0.0578829	0.0865237	0.0683082	0.0470442	0.0358425	0.0934873	0.0587307	0.051338	0.0144482	0.0558501	0.0232989	0.07501	0.04221	0.0476681	0.115267	0.063073	0.0875766	0.10361	0.122539	0.0744904	0.0282501	0.0834043	0.10844	0.116694	0.0947335	0.0568493	0.0838609	0.041219	0.0198545	0.0808538	0.0874971	0.00933371	0.107922	0.0553327	0.0939572
763	21.429	668792	147.1	Lactitol	80.7	0.00230451	0.00238324	0.00276559	0.00251901	0.00286445	0.00223503	0.024415	0.0167404	0.0625448	0.0631178	0.0865237	0.0677074	0.0520842	0.0427615	0.09174	0.0647905	0.0580699	0.0146315	0.0616394	0.0254312	0.0802716	0.0476196	0.0533204	0.120317	0.063073	0.0875766	0.10361	0.121376	0.0811202	0.0305086	0.0891287	0.10844	0.115562	0.0947335	0.0562682	0.0822694	0.0318982	0.0238074	0.0808538	0.0790874	0.00928467	0.107922	0.0595415	0.093055
764	21.43	668792	147.1	N-acetylgalactosamine	90.5	0.00230451	0.00238324	0.00276559	0.00251901	0.00286445	0.00223503	0.020297	0.00868676	0.0574232	0.0578829	0.0865237	0.0677074	0.0458876	0.0353636	0.09174	0.0587307	0.051338	0.0134839	0.0551518	0.0232989	0.07501	0.0416015	0.0469954	0.115267	0.063073	0.0875766	0.10361	0.121376	0.0744904	0.0282501	0.0834043	0.10844	0.115562	0.0947335	0.0562682	0.0826282	0.041219	0.0197719	0.0808538	0.0790874	0.00715266	0.107922	0.0551628	0.093055
766	21.452	668794	259.1	Allantoic acid	88.2	0.00147969	0.00152092	0.00153703	0.0013012	0.00145413	0.00141799	0.00897829	0.0215471	0.00120277	0.0023216	0.00162621	0.00302838	0.00213619	0.000792204	0.00148491	0.0173477	0.00797729	0.0133759	0.00144401	0.00166971	0.00124287	0.00473475	0.00174603	0.0175082	0.00156798	0.00221924	0.00143799	0.00268391	0.00101636	0.00256552	0.0128273	0.00127274	0.00115794	0.00101446	0.000772406	0.000915357	0.000496914	0.00566328	0.000916328	0.000866632	0.000734653	0.00111176	0.00175342	0.00147634
768	21.533	668798	204.1	D-xylose	89.1	0.0192707	0.0201442	0.0208835	0.0216583	0.0221679	0.0220073	0.021389	0.0319535	0.0285512	0.024709	0.0320741	0.0483253	0.0449322	0.0280116	0.0296475	0.0261575	0.0404272	0.0786461	0.0347308	0.0337114	0.0233926	0.0307185	0.0385154	0.0339068	0.0435654	0.0385256	0.0214855	0.0294778	0.0313499	0.0207137	0.0215492	0.0209683	0.022236	0.0234353	0.0374549	0.0167543	0.0162121	0.0192778	0.0206603	0.0272952	0.0273403	0.0208656	0.0285846	0.0223709
769	21.536	668798	217.1	Myo-inositol	95.7	0.0688133	0.0707822	0.0724584	0.0730546	0.0729312	0.073751	0.0803318	0.126718	0.106988	0.0829664	0.1236	0.183562	0.181525	0.101207	0.112837	0.0943765	0.15271	0.281657	0.112588	0.133867	0.079723	0.109003	0.140105	0.130429	0.152169	0.150981	0.0849988	0.113106	0.119513	0.0717515	0.0740608	0.081692	0.0849677	0.0914317	0.0808649	0.0641267	0.0574238	0.0758298	0.0750573	0.103527	0.10294	0.073915	0.103609	0.0843264
773	21.593	668801	338.175	Ferulic acid	80.5	0.000539301	0.00066982	6.0413e-05	0.00055019	0.000608876	0.000616315	2.50088e-05	7.48139e-05	8.19612e-05	0.00155498	9.3296e-05	0.00162598	0.00111646	5.51966e-05	0.000108158	3.48431e-05	0.00099675	0.00148819	0.000118694	0.000100004	0.00138028	0.00011104	0.00180666	5.3204e-05	0.00123263	0.000100698	6.31757e-05	0.00143718	0.00145458	0.000856734	0.000109962	0.00150404	0.00240139	0.0014118	0.00170259	0.00149682	0.000709709	4.84221e-05	0.000102898	0.00173675	7.37284e-05	4.86741e-05	7.80133e-05	0.0014158
774	21.597	668801	477.257	Daidzein	73.1	2.46398e-05	6.03927e-06	2.37719e-05	1.24219e-05	1.73687e-05	1.62034e-05	5.36168e-05	0.0021459	0.000492326	0.000165582	0.000119546	4.91733e-06	0.000322636	0.000462439	0.000242252	0.000102355	0.000348062	0.000115599	0.000288119	0.00493591	0.000138143	0.000136737	0.000686491	0.000398508	0.000178753	0.00229869	0.000809995	0.00169197	0.000271804	5.39902e-05	0.00032488	0.00185537	0.000406133	0.000411227	0.000337589	0.000397595	0.000225839	0.000491074	0.000585733	0.000263819	0.000552684	0.000187981	2.66351e-07	0.000487692
775	21.644	668804	441.2	Uric acid	90.1	0.185332	0.188229	0.193951	0.193341	0.1947	0.194458	0.0419903	0.0900193	0.268907	0.290052	0.494706	0.584096	0.417342	0.39463	0.453152	0.00241681	0.0020271	0.21929	0.623446	0.414001	0.243599	0.167025	0.731829	0.259462	0.386752	0.5648	0.326021	0.295445	0.512075	0.263856	0.105629	0.299496	0.266314	0.218703	0.645629	0.255654	0.185478	0.128463	0.636943	0.14114	0.42002	0.368507	0.407345	0.353505
786	21.847	668815	174.1	3-aminoisobutanoic acid	86.6	0.00320645	0.00359541	0.00354668	0.00362284	0.00377834	0.00377333	0.0359107	0.0141986	0.0182547	0.00807932	0.0127432	0.0138987	0.0187499	0.00490127	0.00468311	0.0107233	0.00495105	0.0109564	0.00969393	0.0465105	0.0067223	0.00947355	0.00925855	0.0434729	0.00566725	0.0393361	0.0212245	0.0293553	0.0102076	0.0143419	0.0160496	0.022328	0.0123455	0.00918661	0.0253104	0.0135324	0.0121851	0.00855116	0.00885052	0.0073878	0.00955799	0.0148167	0.0490754	0.0207428
787	21.877	668816	325.238	Cis-gondoic acid	69	0.000427585	0.000482749	0.000485854	0.000460588	0.000554062	0.000505549	0.00230987	0.000833514	0.000341503	0.00190481	0.00145182	0.000353636	0.000301868	0.000953594	0.00110503	0.000361284	0.00139641	0.000575548	0.000228209	0.000501052	0.00100117	0.000393437	0.000259024	0.00085438	0.00187495	0.00119224	0.00135277	0.000539838	0.000363696	0.000603657	0.000701443	0.000578002	0.000566168	0.000702828	0.000989463	0.000336947	0.000890902	0.000683047	0.000847708	0.00096203	0.00045221	0.000665404	0.000505806	0.000527495
788	21.886	668817	352.183	Guanine	83.5	0.000158803	0.000121156	0.000150488	0.000159533	0.00019113	0.000216983	0.000139855	0.000253694	9.73961e-05	0.000108261	0.000119014	0.000181142	0.000123654	8.22834e-05	8.91805e-05	0.000103534	0.000161343	0.000103285	0.000160703	0.000172448	7.61818e-05	0.00014176	0.000137292	0.000229512	0.000192804	0.000190031	0.000152892	0.000107216	0.000165394	7.89774e-05	0.000157122	6.06837e-05	9.48865e-05	6.83945e-05	0.000122166	5.85207e-05	9.47318e-05	0.000156544	6.85707e-05	0.000131519	5.91384e-05	0.000154811	7.76566e-05	0.000137326
792	21.957	747420	319.175	Allose	93.2	0.000948974	0.000885323	0.00077856	0.000776435	0.000879738	0.00101648	0.00112316	0.000194005	0.00128113	0.00117213	0.00121092	0.00130723	0.00100215	0.000741983	0.000589849	0.00082844	0.00104635	0.00179753	0.00128937	9.93939e-05	0.000687275	0.000935173	0.000238167	0.00110346	0.00136341	0.00108455	0.00056599	0.000107721	0.000889189	0.000429055	0.000741441	0.000157452	0.000597145	0.000780082	0.000724893	0.000529821	0.000502738	0.00042789	0.000951341	0.000567666	0.000733187	0.000826321	0.000566124	0.000798009
794	22.026	747425	294.194	7-methylguanine	70.5	0.00200761	0.00217854	0.00208952	0.00212061	0.002142	0.00219395	0.0013984	0.00645073	0.00523292	0.00303815	0.00238266	0.00237415	0.00313753	0.00275243	0.00280678	0.000916764	0.00226201	0.00603937	0.00703454	0.00347462	0.0026361	0.001368	0.00381993	0.00612752	0.00436343	0.00404406	0.00308863	0.00219973	0.00548082	0.00360474	0.00193681	0.0091737	0.0086692	0.00190221	0.00499005	0.00324552	0.00144271	0.00259215	0.00435037	0.00187744	0.00668144	0.00827054	0.00311991	0.00232401
795	22.065	747428	327.284	Heptadecanoic acid	89	0.0016941	0.00187584	0.00185732	0.00195453	0.00187397	0.0019124	0.00626415	0.00256051	0.0015736	0.00394382	0.00436155	0.00140914	0.00170091	0.00238614	0.00330784	0.00142587	0.00374785	0.00249416	0.00120213	0.00184808	0.00316854	0.00143625	0.001065	0.00291551	0.00665954	0.00486759	0.00369219	0.00225226	0.00168788	0.00211563	0.00253804	0.00218991	0.00200127	0.00250209	0.0027399	0.00167152	0.00284142	0.00251102	0.00310915	0.00310776	0.0019099	0.00209619	0.00211946	0.0021243
797	22.089	747429	243.1	6-hydroxy-alpha-methylnaphthaleneacetic acid	81	0.0267874	0.0321418	0.0358655	0.0403867	0.0435566	0.0481439	0.0458288	0.100683	0.0344322	0.0246712	0.0252798	0.0273124	0.0278935	0.0216223	0.0229544	0.0579841	0.0437137	0.0527302	0.0302305	0.0431973	0.035121	0.03653	0.0319476	0.0577362	0.0361203	0.049772	0.0366862	0.0380276	0.0413621	0.042798	0.0591071	0.0442199	0.0512048	0.0391933	0.0416431	0.038328	0.0496352	0.0643093	0.0421911	0.0374839	0.0830679	0.0348913	0.0579654	0.0408055
799	22.125	747432	274.1	Catechin	74.9	4.86592e-05	6.22684e-05	4.7779e-05	8.51876e-05	8.43646e-05	4.56027e-05	0.000100115	0.000159876	0.000128625	0.000208944	0.000177897	0.00018903	0.0002973	0.00011973	0.000190102	0.000323033	0.000145811	0.000335207	0.000177228	0.000112247	0.000136232	0.000183153	0.000155097	0.000506442	0.000170707	0.000150336	0.000281988	0.000197739	0.000196357	0.000133148	0.000126485	0.000212028	0.000247974	0.000207321	0.000214723	0.000303783	0.000113799	0.000280757	0.000234289	0.000201753	0.000289111	0.000209928	5.47938e-05	0.000356132
801	22.158	747434	327.285	Octadecanol	72	0.000629098	0.000743552	0.000685031	0.000768442	0.000632225	0.000718675	0.000768883	0.000942022	0.000844777	0.000814405	0.000764014	0.00106095	0.000893296	0.000827295	0.000847477	0.000917725	0.000939529	0.000886629	0.000687503	0.000759983	0.000723866	0.000873078	0.000866847	0.000959204	0.000976512	0.0011796	0.000770428	0.00096915	0.000897654	0.000730607	0.000806098	0.000841238	0.000848003	0.000797836	0.000798064	0.000849853	0.000805868	0.000733359	0.000864198	0.00077276	0.000753653	0.000724028	0.000904039	0.000753454
802	22.189	747436	437.214	1-deoxy-1-(4-morpholinyl)-alpha-d-fructopyranose	79.4	0.00022535	0.000230877	0.000207425	0.000215332	0.00021318	0.000230263	0.000985561	0.00668691	0.00172723	0.00183945	0.00258983	0.00810951	0.00190389	0.00205619	0.00140257	0.00297233	0.00382667	0.00908298	0.00167065	0.00322191	0.00170615	0.00231106	0.00148594	0.00379015	0.00317697	0.00224031	0.00162357	0.000952377	0.0028179	0.00107667	0.00346932	0.00341359	0.00330065	0.00241061	0.00242875	0.00262978	0.000839533	0.00613719	0.0047273	0.0024112	0.00660262	0.00125501	0.010898	0.00139454
804	22.251	747441	202.1	Indolelactic acid	80.1	0.00425088	0.00436742	0.00434657	0.00447698	0.00462022	0.00454973	0.00568626	0.0102059	0.00530446	0.0036223	0.0107831	0.0114075	0.0135938	0.00794387	0.00504073	0.00297555	0.00873067	0.0172985	0.00859038	0.0101412	0.00380956	0.00969045	0.00726096	0.0156138	0.00236927	0.0105998	0.00493975	0.00817203	0.0245903	0.00408405	0.00772569	0.00999553	0.00822949	0.00397081	0.0082906	0.00561818	0.00424459	0.00514507	0.00647332	0.0044102	0.0104058	0.00894629	0.0112423	0.0059571
808	22.294	747443	202.1	Octanal	66.9	0.0043272	0.00450962	0.00449282	0.00458918	0.00476163	0.00464106	0.00588067	0.010388	0.00585242	0.00373537	0.000177337	0.0115159	0.000181936	0.00794387	8.45226e-05	0.00300336	0.00890969	0.0176527	4.3369e-05	0.0101412	0.00386741	0.0101307	0.00752387	0.0163714	0.00251224	0.0110324	0.00499232	0.00817203	0.025356	0.00432688	0.00793441	0.0101491	0.00841547	0.00409982	0.0087141	0.00567581	0.00450071	0.00517276	0.00660374	0.00475445	0.000126045	0.00921165	0.0114719	0.00606071
813	22.401	747451	174.1	Glycyl-glycine	85.9	0.00262385	0.00267829	0.00265267	0.00290573	0.00318005	0.00314208	0.016784	0.0169842	0.0268586	0.0159395	0.036339	0.0163973	0.0230378	0.00371289	0.0106516	0.0134786	0.0090044	0.0155874	0.0117486	0.0189945	0.0128703	0.0160127	0.00776504	0.0752875	0.0168956	0.0561794	0.0172672	0.0303627	0.0106416	0.0241772	0.0211953	0.0199259	0.01523	0.011283	0.0103977	0.0120337	0.0125529	0.00839265	0.0135047	0.007192	0.0118517	0.0120697	0.0611985	0.0267767
819	22.511	747458	342.188	D-myo-inositol 4-phosphate	78.6	0.0159354	0.0163616	0.0164283	0.0166379	0.0168715	0.0168633	0.00989812	0.0226744	0.0137749	0.0123647	0.0174866	0.00752237	0.00930572	0.00582836	0.00820722	0.0113017	0.0128166	0.0173154	0.0173593	0.017522	0.0187007	0.00719323	0.0148696	0.0232816	0.0162297	0.0105524	0.0221249	0.013042	0.0184833	0.0129068	0.0126388	0.0251013	0.0310322	0.0269989	0.0287855	0.0109246	0.0166808	0.014752	0.0378368	0.0200806	0.0129686	0.0138202	0.00738295	0.011263
823	22.568	747462	202.1	L-tryptophan	88.5	0.206714	0.217202	0.20632	0.210775	0.217804	0.224146	0.0412616	0.0371716	0.219469	0.189744	0.268523	0.147312	0.130162	0.132208	0.144712	0.0785185	0.110802	0.269634	0.309361	0.324935	0.160594	0.224466	0.115462	0.412008	0.126356	0.394527	0.197984	0.257539	0.204381	0.266747	0.272084	0.267669	0.296169	0.184992	0.197084	0.193114	0.22809	0.177466	0.214012	0.169552	0.401302	0.243979	0.348643	0.221164
824	22.578	747463	129	Linoleic acid	88.4	0.0416577	0.0432571	0.0437548	0.0438488	0.0453874	0.0446475	0.174467	0.0413615	0.033006	0.0940631	0.115551	0.0366684	0.0487383	0.0671883	0.0707803	0.0234603	0.106449	0.0427921	0.0242384	0.026421	0.0747735	0.0278989	0.0221859	0.0869571	0.204447	0.0752966	0.109218	0.064187	0.0384976	0.0514306	0.0686711	0.0573821	0.0392736	0.0608789	0.0799928	0.0249652	0.102734	0.054664	0.0666382	0.0729775	0.0281691	0.0480932	0.0429126	0.0330592
825	22.583	747463	314.3	1,4-dihydroxy-2,6-dimethoxybenzene	75.2	0.0443995	0.0448661	0.0451202	0.0452995	0.0458807	0.046532	0.0584324	0.0534854	0.0604642	0.0583993	0.0628846	0.0641972	0.0590568	0.0532395	0.0618973	0.0401879	0.0459448	0.0529805	0.066667	0.0583039	0.0592987	0.0547927	0.0571385	0.077	0.0653124	0.0642123	0.0535752	0.0583864	0.0647019	0.0561588	0.0591177	0.0577663	0.0629702	0.0589236	0.0568978	0.066348	0.0501117	0.0534403	0.0604358	0.0593612	0.0582934	0.056135	0.0678193	0.0706765
830	22.62	747466	129	Oleic acid	99.7	0.0898645	0.0912238	0.0918546	0.0931346	0.0938207	0.0948218	0.375124	0.0975189	0.0562452	0.2917	0.2552	0.0644123	0.0709186	0.153935	0.211454	0.0552408	0.285068	0.0718047	0.0317186	0.0580771	0.20064	0.0629149	0.0278859	0.126695	0.341204	0.229066	0.238959	0.126687	0.0752094	0.0974652	0.134425	0.106732	0.0731293	0.149391	0.18029	0.0578309	0.17944	0.11207	0.157336	0.165398	0.057395	0.0844567	0.071461	0.0887919
831	22.65	747468	320.19	6,7-dimethyl-4-hydroxy-2-pteridinamine	69.6	0.00051119	0.000699859	0.000533603	0.000882258	0.000863736	0.000736551	0.00201599	0.00813398	0.0177663	0.00724193	0.00922126	0.0289369	0.0112952	0.00827237	0.0107138	0.0109616	0.00781358	0.0195399	0.0157498	0.00827965	0.00724274	0.00965358	0.0105167	0.0140511	0.0155015	0.012125	0.00528603	0.00934341	0.00837983	0.00470621	0.0128989	0.00931713	0.0181979	0.0110053	0.00770973	0.00981401	0.00427298	0.00779418	0.0095611	0.00769754	0.0111001	0.0103581	0.013363	0.0118597
840	22.806	747478	117	Montanic acid	90.4	0.0762504	0.0795305	0.0787592	0.0853287	0.0851456	0.0845351	0.20379	0.0950664	0.0796593	0.142013	0.191056	0.0867685	0.0864782	0.105482	0.135313	0.0697843	0.133098	0.100064	0.0659857	0.071205	0.109916	0.0690475	0.0540582	0.097711	0.236111	0.17165	0.132073	0.0850776	0.0812974	0.0778673	0.0858798	0.0844689	0.0794015	0.100035	0.109444	0.0685371	0.111201	0.09013	0.108286	0.102786	0.0811332	0.0740097	0.0821502	0.0799616
841	22.806	747478	117	Stearic acid	99.6	0.0762504	0.0795305	0.0787592	0.0853287	0.0851456	0.0845351	0.20379	0.0950664	0.0796593	0.142013	0.191056	0.0867685	0.0864782	0.105482	0.135313	0.0697843	0.133098	0.100064	0.0659857	0.071205	0.109916	0.0690475	0.0540582	0.097711	0.236111	0.17165	0.132073	0.0850776	0.0812974	0.0778673	0.0858798	0.0844689	0.0794015	0.100035	0.109444	0.0685371	0.111201	0.09013	0.108286	0.102786	0.0811332	0.0740097	0.0821502	0.0799616
843	22.849	747481	438.2	6-propyl-2,4,7-pteridinetriol	70.7	0.000156714	0.000145826	0.000194523	0.000142158	0.000167116	0.000139573	0.000394423	0.00154799	0.000572973	0.000544155	0.000635453	0.000349829	0.000698155	0.000544143	0.000437306	0.000111178	0.000615187	0.00142778	0.000560463	0.000231172	0.000432862	0.000674285	0.000641901	0.00098057	0.000115422	0.000607277	0.000459108	0.000387346	0.000764362	0.000345397	0.00078443	0.000819753	0.000154761	0.00059856	0.000564233	0.000113856	0.000432474	0.00165467	0.00109258	0.000666198	0.000310738	0.000679572	0.0028884	0.000453023
844	22.908	747485	308.1	N-acetyl-l-tyrosine	71.3	0.000481571	0.000550509	0.000506365	0.000479888	0.000500747	0.00058783	0.00370854	0.00274551	0.00596214	0.00775658	0.0101307	0.00500569	0.00481571	0.00568357	0.00843277	0.00792639	0.00791598	0.00228627	0.00752401	0.00321305	0.00795038	0.0169237	0.010189	0.0212524	0.00750068	0.0127958	0.00895702	0.0120693	0.0102254	0.00392655	0.0102628	0.0103248	0.01391	0.0074253	0.00668057	0.0090581	0.00328333	0.00305733	0.0110835	0.00765532	0.00156879	0.00844914	0.00623073	0.00913338
845	22.917	747486	131.1	1-monoolein	82.6	0.00439037	0.00462995	0.00451887	0.00436048	0.00477326	0.00471601	0.00579652	0.0058474	0.00732877	0.00546081	0.00627959	0.00990211	0.00596201	0.00572267	0.00601777	0.00635827	0.00589939	0.00783235	0.0073822	0.00587113	0.00633249	0.00677103	0.00623884	0.00826047	0.0072912	0.00669053	0.00649894	0.00636904	0.00763981	0.00548378	0.00595219	0.00728018	0.0101149	0.00801071	0.00646473	0.00682275	0.00523335	0.00638253	0.00707981	0.00661267	0.00636822	0.00706941	0.00643397	0.00640534
848	23.017	747493	275.08	2-isopropylmalic acid	59.1	9.92529e-05	4.23516e-05	0.000136373	0.000113357	0.000119826	0.000221835	0.000144942	0.00162861	0.000259684	0.000383335	0.000140913	0.000331897	0.00215186	0.000142331	0.000162463	0.000228593	0.000294414	0.000285144	3.36926e-05	0.000684916	0.000132477	0.00012606	4.15274e-05	0.000410615	0.000169975	0.00105009	0.000441141	0.000556876	0.000146597	0.000129841	0.000217648	0.000288412	0.000285813	0.000575624	8.95915e-05	0.000268282	0.000215843	0.000383214	0.000266505	0.000162315	0.000398596	0.000151178	0.000771141	0.000263319
849	23.022	747493	204.1	Saccharopine	61.5	0.00327604	0.00368682	0.00346576	0.00348959	0.00374134	0.00199831	0.018945	0.00519368	0.0435106	0.0645497	0.0930683	0.117493	0.0434916	0.090858	0.0558542	0.112076	0.0997299	0.126834	0.0737869	0.054303	0.0804837	0.102634	0.0682683	0.129297	0.109344	0.0652234	0.051857	0.0410641	0.122658	0.0150457	0.103212	0.0972945	0.128232	0.0882657	0.090245	0.0882903	0.0219147	0.0580234	0.171867	0.103427	0.0400317	0.0692588	0.0374943	0.057364
855	23.113	747499	146.069	L-cystine	85.3	0.0042052	0.0050343	0.00473309	0.00468932	0.00493158	0.00475765	0.0024072	0.00240692	0.00328343	0.00232957	0.00473894	0.00578126	0.0051434	0.00240792	0.00350905	0.00244686	0.00229046	0.00246768	0.00916871	0.00412074	0.00343924	0.000111286	0.00512464	0.00413322	0.00525009	0.00425903	0.00324208	0.00533031	0.00615168	0.00248742	0.0020451	0.00371852	0.00543654	0.00825181	0.0104783	0.00505215	0.0051997	0.0017379	0.00796694	0.0106576	0.00502496	0.00807162	0.00603732	0.00639276
860	23.192	747505	103.075	Galactinol	93.6	0.000355857	0.000311271	0.000244073	0.000260498	0.000343325	0.000346689	0.00218995	0.000504069	0.000587734	0.000221682	0.0090407	0.00080385	0.000359113	0.000513499	0.00025322	0.00170728	0.000270391	0.000392835	0.000687544	0.000475367	0.000403582	0.000311111	0.000542211	0.000844269	0.00813371	0.000445231	0.000344776	0.000889981	0.000603623	0.000164487	0.000286147	0.000160148	0.0131856	0.000122778	0.000629668	0.000235407	0.00364733	0.000298903	0.000804952	0.00667784	0.00020032	0.00557807	0.000513585	0.000261313
862	23.234	747508	387.2	Mannose 6-phosphate	94.6	0.000507598	0.000558359	0.000452498	0.000533382	0.000430085	0.000489256	0.000640815	0.00119761	0.000556337	0.000451166	0.000662826	0.000530307	0.00208832	0.000440982	0.000534601	0.000665804	0.00140286	0.00136701	0.000883216	0.000807792	0.000439307	0.00056019	0.000633417	0.00142866	0.000923099	0.00112617	0.000687546	0.000703858	0.000590547	0.00031453	0.000531306	0.000408462	0.000408214	0.000425276	0.000560643	0.000526024	0.000317501	0.000451458	0.000565388	0.000520307	0.000739509	0.000510933	0.000874334	0.000460561
869	23.328	747514	87.1	Amantadine	87.6	0.999436	0.999885	1.00009	0.0001061	1.00055	1.00051	0.000137864	0.000194391	0.000257658	0.000267338	0.000163386	0.00033202	0.000295672	0.000181796	0.00032897	0.000691637	0.000276834	0.000346769	0.000273877	0.000221394	0.000699347	0.00030784	0.000425695	0.000890606	0.000170974	0.00015151	0.000422478	0.000496842	0.000977611	1.00055	0.000675236	0.000602517	0.000892358	0.000127542	0.000166264	0.000186576	0.000247242	0.000143546	0.00090084	0.000154144	0.000108091	0.000158935	7.20368e-05	0.000168127
871	23.346	747515	217.1	Pseudo uridine	85.6	0.0109741	0.0107315	0.0107381	0.0108625	0.0114162	0.0112243	0.0210128	0.0386587	0.0230247	0.032354	0.0384877	0.0703531	0.058508	0.0489169	0.0401263	0.0291318	0.0368461	0.066822	0.0483725	0.0385234	0.0229244	0.0355903	0.0587712	0.056377	0.0362578	0.0388762	0.0289357	0.0263094	0.0392334	0.015425	0.0337507	0.0276327	0.0308167	0.0216853	0.0310069	0.0243293	0.013635	0.0236568	0.0278523	0.0253502	0.0257146	0.0280631	0.0298095	0.0254658
872	23.381	747518	417.2	Beta-tocopherol	58	0.000124363	0.000123022	0.000204166	0.000163196	0.00017984	0.000340498	0.000104984	0.000246705	0.000104114	0.000122264	0.000507079	8.32351e-05	0.000122286	0.000135383	5.53096e-05	0.000154595	0.000216612	0.000242208	0.000129492	0.000103824	0.000107176	0.000126087	0.000134545	0.00019287	0.000125459	6.37048e-05	0.000121467	0.000254417	0.000534324	7.27232e-05	0.00020997	0.000107398	0.000401865	0.000281406	0.000210299	0.00011891	0.000122827	0.000142932	0.000160171	0.000366847	0.000162522	0.000164389	0.0003765	0.000125753
873	23.389	747518	290.1	2-indolecarboxylic acid	83	0.00228495	0.00220929	0.00222822	0.00218132	0.00219363	0.00230162	0.0015288	0.00396484	0.0024462	0.00248478	0.00319173	0.00215963	0.00185697	0.00263038	0.000183951	0.00237993	0.00225803	0.00238845	0.00217875	0.0036553	0.00290045	0.00329656	0.00324612	0.0052535	0.00343257	0.00225238	0.00215772	0.0034416	0.00347664	0.00205201	0.00368857	0.00185956	0.00424096	0.00283841	0.00188184	0.002281	0.00263419	0.00345717	0.00265447	0.00266648	0.00424561	0.00264793	0.0029459	0.00212444
875	23.414	819620	326.3	2-amino-7,10-dimethyldibenzo[b,f][1,4]oxazepin-11(10h)-one	76.2	0.432202	0.438713	0.44923	0.453519	0.452121	0.452427	0.392587	0.393618	0.409816	0.407942	0.406368	0.408931	0.409421	0.420955	0.409766	0.411935	0.413985	0.418441	0.419321	0.41266	0.409864	0.422607	0.41773	0.412338	0.429965	0.424607	0.425867	0.421778	0.418598	0.439206	0.416596	0.424154	0.408367	0.423318	0.40944	0.411404	0.42427	0.42457	0.41206	0.410732	0.432087	0.427599	0.438034	0.416615
877	23.485	819626	331.133	Glycero-d-gulo-heptose	83.2	5.50271e-05	0.00249156	0.00219023	0.00196043	0.00190948	0.00177512	0.00469399	0.00743391	0.00571001	0.00446655	0.00046196	0.00685942	9.94656e-05	0.004617	0.00414885	0.00532794	0.00458548	0.0049515	0.00512038	0.00555316	0.00560852	0.00390858	0.00480703	0.00721537	0.00485106	0.00470326	0.00351075	0.00493534	0.00465349	0.0022828	0.00477611	0.00428058	0.00548192	0.00425333	0.000306526	0.00340776	0.00274729	0.00413795	0.00473389	0.00307082	0.00569451	0.0038216	0.00497594	0.000641072
879	23.511	819628	103	D-tagatose	61.2	0.127902	0.126411	0.109367	0.100352	0.0948482	0.0832223	0.262025	0.375288	0.278223	0.227837	0.320652	0.272626	0.0034975	0.204457	0.217747	0.215658	0.210408	0.206404	0.248992	0.272337	0.26918	0.169329	0.223725	0.336187	0.236379	0.258632	0.176983	0.262205	0.194448	0.125024	0.221379	0.200653	0.248318	0.202755	0.204515	0.147268	0.138652	0.178702	0.216087	0.136999	0.284273	0.177198	0.211775	0.23294
887	23.643	819640	241.02	Conduritol-beta-epoxide	72	7.08196e-05	0.000208711	3.70691e-05	0.000319735	6.23359e-05	0.000192104	0.000325226	0.000574546	0.00054607	0.000344091	0.000387117	0.000744464	0.000300289	0.000339229	0.000405169	0.000487015	0.000597473	0.000520465	0.000396029	0.00021822	0.000278435	0.00035408	0.00018284	0.000482335	0.000411462	0.00049784	0.000422796	0.000363693	0.000492374	0.000315877	0.000654315	0.000588936	0.000719669	0.000726787	0.000424888	0.000478764	0.000255559	0.000408185	0.0004741	0.000325803	0.000273122	0.000323109	0.000470046	0.000339214
888	23.647	819640	91.1	Arachidonic acid	93.5	0.00169265	0.00172103	0.00189265	0.00212389	0.00212832	0.00213616	0.00886332	0.00503726	0.00236724	0.00611193	0.00531527	0.00321803	0.00205784	0.00261473	0.00431707	0.00116153	0.00275118	0.00211416	0.00227987	0.00220399	0.00295644	0.00150823	0.00208821	0.00343362	0.00900607	0.00217065	0.00317992	0.00251709	0.00389933	0.00231334	0.00264287	0.00320715	0.00433185	0.00244988	0.00320723	0.00190809	0.00273015	0.00190275	0.00373161	0.00288994	0.00180137	0.00240393	0.00190921	0.00251516
890	23.684	819643	313.153	Resveratrol	78.9	0.00513727	0.00535852	0.00640559	0.0065899	0.00591371	0.00535355	0.00311366	0.00558548	0.00462215	0.00438356	0.00514563	0.00559313	0.00627421	0.00631075	0.00655458	0.00638429	0.00777276	0.00734846	0.00590003	0.00656945	0.00723817	0.00836207	0.00694222	0.00803755	0.00517851	0.0094253	0.0120349	0.00991578	0.0111723	0.00691582	0.0126157	0.0130994	0.011909	0.0111215	0.0110903	0.0145323	0.0105616	0.0137066	0.011512	0.0129487	0.0103891	0.0139074	0.00873429	0.00810865
891	23.69	819644	267.1	2-hydroxyundecanoate	91.8	0.000213641	0.00014278	0.000193979	0.000288126	0.000238095	0.000275287	0.000193486	0.000293984	0.000133726	0.000125917	0.000143056	0.000158802	0.000201071	9.7014e-05	0.000116967	0.000158855	0.000223989	0.000175973	9.4526e-05	0.000184411	0.000145536	0.000172273	0.000148419	0.000144655	0.000465576	0.000168927	0.000170223	0.000139432	0.000266468	0.000118674	0.000259984	0.000241143	0.000236033	0.000204835	0.000212176	0.000168485	0.000150231	0.000188036	0.000275313	0.000394242	0.000330825	0.000257774	0.000120197	0.000149532
897	23.809	819654	239.2	Dehydroabietic acid	63.1	5.03471e-05	0.000102377	3.69563e-05	0.000152669	6.67235e-05	0.000176418	0.000396503	0.000450391	7.26351e-05	0.00034208	0.000271984	0.00013813	0.000197388	0.000182631	0.000188789	0.000191033	5.67285e-05	3.49322e-05	0.000282333	7.34999e-05	6.43041e-05	0.000115364	6.61589e-05	0.00111164	0.00153678	5.30402e-05	6.87764e-05	9.13319e-05	5.96315e-05	9.25905e-05	0.000932605	0.000123143	0.000156017	6.23141e-05	0.000370443	2.44573e-05	0.000208846	0.000112651	9.9654e-05	0.000257144	7.69952e-05	5.56255e-05	0.00017552	7.34441e-05
898	23.844	819657	318.168	Myo-inositol phosphate	93.2	0.00169867	0.00172492	0.00179918	0.00186067	0.0018761	0.00199686	0.00296734	0.00666057	0.00449698	0.00495356	0.00615254	0.00353458	0.00335915	0.00316927	0.00305688	0.00344407	0.00368277	0.00375803	0.00559779	0.00466898	0.00527743	0.00205978	0.00450961	0.00606014	0.0050123	0.00351436	0.0024082	0.00363533	0.00293137	0.00241771	0.00379177	0.00336109	0.00379091	0.00326443	0.00479293	0.00236356	0.00214565	0.00239992	0.0043759	0.00280611	0.00370926	0.00295822	0.00462735	0.00322424
903	23.904	819662	290.2	Edetic acid	96.5	3.24626	3.22919	3.17354	3.18138	3.0391	3.03331	4.34492	6.06202	5.08245	4.4924	5.11113	5.00579	4.61614	4.39642	4.65764	4.44299	5.22849	5.22915	4.61965	5.36209	4.77742	5.14637	4.87553	5.62581	4.08126	5.97347	4.6818	5.33581	4.31506	3.81899	5.38631	5.00914	4.7588	4.37648	4.61176	4.73519	4.39636	5.0733	4.53612	4.2405	6.59485	4.56444	5.78259	5.10178
913	24.069	819677	258.1	Uridine	95.6	0.00134767	0.00147562	0.00136589	0.00135457	0.00161583	0.00157308	0.00137514	0.00146486	0.0019437	0.00188601	0.00215674	0.00183334	0.00253077	0.00164033	0.00230948	0.00148499	0.00205214	0.00341568	0.0026829	0.00212773	0.00235941	0.00173206	0.00158153	0.00526939	0.0015468	0.00512818	0.00243161	0.00342408	0.00351706	0.00267342	0.00332331	0.00329268	0.00334945	0.00228592	0.00207709	0.00254976	0.00153323	0.00260633	0.00367477	0.00232098	0.00204779	0.00312025	0.00330471	0.00193324
915	24.084	819678	131.1	Oleamide	77.5	0.0113265	0.0120524	0.0126539	0.0128455	0.0139586	0.0134793	0.00687857	0.00824756	0.00947292	0.00931562	0.0108669	0.0123382	0.0100646	0.00988713	0.0098117	0.0116157	0.0119959	0.0120834	0.0155866	0.0106479	0.013694	0.0110693	0.0111396	0.0211504	0.0123676	0.0125811	0.0121854	0.0131302	0.0123044	0.0122507	0.0130497	0.0133451	0.0130673	0.01272	0.0115046	0.0114541	0.0123227	0.0134556	0.0122642	0.0119276	0.0110734	0.0121891	0.0126314	0.0117201
933	24.373	819703	356.329	Gallocatechin	63	0.00130718	0.00137097	0.00129891	0.00151689	0.00133985	0.00150573	0.000988192	0.000932838	0.00075212	0.00123547	0.00125827	0.00111611	0.00100757	0.0011053	0.00115511	0.000978693	0.00114002	0.0010388	0.00114135	0.00105941	0.00139768	0.00125794	0.00104284	0.00133438	0.000802643	0.00154437	0.00112669	0.000960938	0.00125279	0.00074218	0.0011741	0.00142319	0.00123401	0.00143656	0.00106228	0.00138729	0.000896512	0.00109139	0.00121846	0.00106067	0.000994007	0.000872652	0.00179681	0.00113421
934	24.412	819706	202.1	N-acetyl-d-tryptophan	82.9	0.000644994	0.000530257	0.000805341	0.000764571	0.000567664	0.000682902	0.0118509	0.00425436	0.0175981	0.0189511	0.0293285	0.0147011	0.0062184	0.0112957	0.0206418	0.00466247	0.00789836	0.00460494	0.0197264	0.00764339	0.01076	0.0146929	0.00811865	0.0381724	0.0100373	0.029009	0.0116124	0.0233819	0.00937439	0.00637282	0.0150977	0.0171793	0.0188728	0.00974515	0.00781227	0.0115674	0.00406698	0.00316421	0.0105933	0.00824173	0.00366414	0.0149382	0.0205189	0.0164025
935	24.42	819707	267.1	Catechollactate	78.9	0.000112051	0.000182308	0.000194818	8.2602e-05	0.000129144	0.000120587	9.73132e-05	0.000199336	0.000154164	7.33688e-05	0.000181071	0.000131433	0.000180967	0.000291358	0.000134362	0.000439729	0.000361967	0.000279103	0.000257562	0.000136629	0.000168159	0.000162117	0.00031624	0.000206211	6.57677e-05	0.000113583	0.000106412	0.000133085	0.000195826	0.000226214	0.000372028	0.000262547	7.30781e-05	0.000277379	0.000323461	0.000241882	0.000152697	0.000202163	0.000147198	0.000109757	0.000185856	0.000249775	0.000173747	0.00020602
938	24.507	819714	276.1	Bicine	62	0.000111771	0.000100821	9.49027e-05	0.000115355	8.30363e-05	8.28193e-05	8.03728e-05	0.0002177	0.000537357	0.000261004	0.000420515	0.00180148	0.00026767	0.0011496	0.000518039	0.000743632	0.000381351	0.000610009	0.000507493	0.000162691	0.000159679	0.000324244	0.00121572	0.000325601	0.000253525	0.000626231	0.000135698	0.00020136	0.000292346	0.000215038	0.000212836	0.000810277	0.000183524	0.000195299	0.000150543	0.000121506	9.68539e-05	0.000222672	0.000155893	0.000149591	0.000264153	0.000148984	0.00243111	0.000157448
947	24.669	886630	361.2	Trisaccharide	88.6	0.000174833	0.000218257	7.5212e-05	0.000107164	9.14003e-06	0.000124184	0.000270015	0.000575148	0.000245664	0.000213357	0.000339818	0.000268428	0.000283237	0.000373413	0.000454086	0.000530976	0.000280931	0.000582689	0.000278403	0.000207987	0.000411432	0.000495088	0.000314504	0.00084832	0.000252125	0.000344169	0.000216845	0.000191909	0.000865157	0.000115964	0.000565187	0.000621139	0.00114603	0.000635249	0.000514906	0.000437822	0.00022604	0.00060037	0.000906414	0.000454399	0.000465218	0.000480949	0.000333766	0.000266361
948	24.701	886633	91.075	Docosahexaenoic acid	97.9	0.00197535	0.00212924	0.002065	0.00210947	0.0023262	0.00239017	0.00738888	0.00449885	0.00192747	0.0120458	0.008028	0.00185764	0.00172411	0.00441303	0.00460781	0.00100247	0.00656984	0.00336397	0.00306882	0.00348647	0.00646683	0.00143467	0.0017915	0.00405704	0.0098211	0.00410496	0.00420784	0.00174272	0.00295572	0.00333217	0.00231871	0.00387622	0.00825122	0.00444973	0.00437822	0.00379555	0.00456912	0.00336502	0.00904378	0.0146774	0.0020821	0.00728604	0.00288034	0.00266224
949	24.714	886635	355.157	Epigallocatechin	69.3	0.000918912	0.00158324	0.00130986	0.000963149	0.000953497	0.00165495	0.00231747	0.00518891	0.000172269	0.00117289	0.000452909	0.000303312	0.00065306	0.000186244	0.000438808	0.00347343	0.00403126	0.00197255	0.000377166	0.00035274	0.000765363	0.00103865	0.000172124	0.00426631	0.00045578	0.00116136	0.00114509	0.000428004	0.000201827	0.00196926	0.00262663	0.000600228	0.000427606	9.53354e-05	0.000383272	0.000253863	0.000242541	0.00265398	0.000134973	0.000517716	0.000368893	0.000281054	0.000323145	0.000761102
952	24.756	886639	472.383	7-ketocholesterol	91.2	0.000124892	0.000534668	0.000385678	0.000265615	0.00117087	0.000943844	0.00131925	0.00494009	0.000892648	0.000450844	0.000725884	0.000619915	0.00139842	0.000490774	0.000512502	0.000641113	0.0255991	0.00313666	0.00725855	0.000836092	0.000417903	0.00141815	0.0021434	0.000870165	0.00527387	0.000608334	0.00136102	0.000294847	0.00138847	0.000145815	0.000482625	0.000798848	0.00109665	0.00033228	0.000391295	0.00042408	0.000410383	0.00071037	0.000411443	0.00459096	0.000311347	0.00494565	0.000522863	0.000431425
953	24.764	886640	186.1	Nicotianamine	91.2	0.000334231	9.24597e-05	0.000433193	0.000371571	0.000328621	0.000483083	0.000413473	0.000836114	0.000332549	0.000800711	0.000781757	0.00137694	0.000964207	0.00163977	0.000585768	0.00176165	0.00290655	0.00240828	0.00201586	0.000642652	0.00148326	0.00089061	0.00212057	0.00198108	0.000767588	0.00117863	0.000801333	0.000948485	0.00214155	0.000437199	0.000968363	0.000661915	0.00137321	0.000414159	0.0010379	0.000725215	0.00048655	0.00113489	0.000716063	0.000547622	0.000813932	0.000687095	0.000788691	0.000486949
955	24.804	886644	371.3	1-monopalmitin	96.8	0.0204379	0.0216935	0.0227726	0.0232039	0.0245199	0.0277837	0.0273855	0.038505	0.0271286	0.0289815	0.0308043	0.0301155	0.0274216	0.0296539	0.0259471	0.0269951	0.0282459	0.0286872	0.027352	0.0293651	0.0301553	0.0259049	0.02652	0.0350497	0.0307413	0.0343078	0.0265162	0.0272696	0.0282486	0.0236282	0.0296415	0.0275191	0.0290597	0.0258253	0.027865	0.0274873	0.0212775	0.0277739	0.0289545	0.0288849	0.0281496	0.0270943	0.0279003	0.0302013
967	24.973	886661	395.35	Erucic acid	76.7	0.000273893	0.000364537	0.000362413	0.000393537	0.00035545	0.00034081	0.00102898	0.00372112	0.00046953	0.000550894	0.000617844	0.000736475	0.000528389	0.00058858	0.00118239	0.000539989	0.00242847	0.000821352	0.000401486	0.00156498	0.000509085	0.000386055	0.000576359	0.000507073	0.000656775	0.000908199	0.000513665	0.000627905	0.000458452	0.000202231	0.000610173	0.000400207	0.000413836	0.000439126	0.0004645	0.000505262	0.000230701	0.000369783	0.000669927	0.000950557	0.00036467	0.000452133	0.000314584	0.000679993
968	24.985	886662	361.2	Sucrose	97.6	0.00833271	0.00852959	0.00874888	0.00872207	0.00902052	0.00916729	0.00299601	0.0089032	0.00433311	0.0327037	0.00412267	0.311594	0.00380331	0.0847948	0.00342495	0.00469274	0.0141159	0.00803193	0.00791808	0.00898418	0.00808035	0.00424765	0.0101446	0.0114588	0.00286881	0.0179232	0.00323077	0.00708783	0.00978037	0.00246986	0.00293921	0.00366029	0.00387831	0.0062508	0.00291465	0.00414369	0.00172635	0.00441452	0.00304238	0.00310367	0.00651116	0.00287507	0.00801707	0.00414468
971	25.011	886665	399.4	Butorphanol	57.3	8.91951e-05	0.000106477	0.000104427	0.000230629	0.000179528	0.000133975	0.000367768	8.21313e-05	0.000109996	0.000153026	0.000133605	0.000106676	0.00031096	0.000119436	0.000300028	0.00043889	0.000391009	0.000200979	0.000352539	0.000245365	0.000190243	0.000169906	0.000184977	0.000570145	0.000320958	0.000373674	0.000223906	0.000696641	0.000270676	0.000336008	0.000278337	0.000152852	0.000217374	0.00040233	0.000189522	0.000149684	0.000141221	0.000198929	0.000176117	0.000522297	0.000389531	0.000310264	0.00675542	0.000243997
972	25.029	886667	237.1	Adenosine	74.1	0.000173406	0.000399029	0.000249262	9.28101e-05	0.00019033	0.000134831	0.000261182	0.00018813	0.000234439	9.67548e-05	0.000272111	0.000239816	8.54266e-05	0.000220237	0.000116922	0.000139389	0.000249149	0.000382007	0.000127207	0.00015469	0.000284836	0.000300568	0.000218821	0.000299891	0.000145734	0.000227678	0.000248182	0.000286391	0.000505337	0.000178203	0.000327293	0.000168561	0.000444694	0.000278076	0.000286987	0.000394407	0.000156246	0.000176256	0.000172243	0.000180689	9.28361e-05	0.000237874	0.0002433	0.000400621
973	25.035	886667	204.1	Methyl beta-d-glucopyranoside	91.7	0.000556496	0.000394936	0.000297077	0.000473258	0.00188349	0.00171701	0.00807988	0.00361191	0.00222911	0.00079745	0.00210817	0.002078	0.0112257	0.00142708	0.0013926	0.00429296	0.0016819	0.00191357	0.00238495	0.00915278	0.00280678	0.00184436	0.00209298	0.00525032	0.00218082	0.00480618	0.00164857	0.00230381	0.00600337	0.0020622	0.0035296	0.00544654	0.00459529	0.00519096	0.0077611	0.00325883	0.00200789	0.00528432	0.00421248	0.00384291	0.00540741	0.00487086	0.005468	0.0040825
976	25.079	886672	397.323	Cerotinic acid	72.6	0.000579621	0.000508587	0.000588513	0.000659392	0.000617521	0.000583431	0.00104563	0.00135986	0.000982518	0.000625768	0.000860923	0.00150272	0.00116943	0.000733433	0.00083884	0.000765651	0.000718708	0.000619383	0.000841749	0.000813754	0.000770037	0.000548999	0.00100297	0.00168088	0.00187611	0.00346977	0.00105364	0.00138558	0.0010046	0.000500443	0.000683903	0.000819138	0.000834643	0.000661136	0.000812722	0.000701283	0.000612483	0.000720497	0.000741915	0.000652827	0.00081663	0.000527182	0.00091083	0.000602322
989	25.344	886699	204.1	Alpha-lactose	95.5	0.0049562	0.0056837	0.00591905	0.00620053	0.00568111	0.00599077	0.00667062	0.0995963	0.0155041	0.0169234	0.0224867	0.0544529	0.00521952	0.0295957	0.0195941	0.0119389	0.0201606	0.00801225	0.0266469	0.0217075	0.0254367	0.010178	0.0243938	0.0350982	0.0330978	0.0365108	0.0627529	0.0501876	0.0148875	0.00378877	0.00961755	0.0110599	0.0140229	0.0119246	0.00472104	0.0190431	0.00593252	0.0061241	0.0127054	0.0109671	0.00386587	0.015861	0.00827258	0.0232166
991	25.4	886704	200.09	Spermine	65.6	0.00037639	0.000558889	0.000308823	0.000452496	0.000415276	0.000347557	0.00201613	0.00369996	0.00242097	0.00112998	0.00146598	0.00320399	0.00251889	0.00117552	0.00210204	0.00163618	0.00174869	0.00732329	0.000993285	0.0106635	0.00123788	0.00184314	0.00120031	0.00679224	0.00261358	0.00351683	0.0025784	0.00211919	0.00192864	0.00132776	0.00264315	0.00257359	0.00190187	0.00209991	0.00430999	0.00255049	0.00176142	0.00344976	0.0019591	0.00123201	0.00475212	0.00145333	0.00424415	0.00238144
993	25.44	886708	290.113	Psilocin	83.1	0.000911596	0.00123057	0.00122438	0.000962768	0.000812976	0.000798683	0.00161479	0.00229863	0.00301144	0.00224072	0.00379923	0.00475631	0.00265656	0.00267016	0.00316089	0.00353704	0.00335162	0.00396058	0.00360244	0.00505657	0.00391006	0.00367737	0.00373343	0.00599211	0.00402196	0.00516146	0.0026335	0.00454388	0.0028317	0.00141725	0.00578303	0.00369461	0.00435555	0.0036654	0.00352309	0.00337748	0.00187706	0.00276743	0.00355771	0.00297299	0.00630828	0.00358359	0.00510611	0.00433782
995	25.488	886713	147.1	Alpha tocopherol	67.8	0.00627069	0.00668091	0.00493059	0.00525871	0.00571158	0.00584867	0.00936191	0.00652371	0.0205633	0.0272245	0.0215627	0.0491376	0.0218106	0.0589625	0.022552	0.0178162	0.0469305	0.0570466	0.0345726	0.0380001	0.0194282	0.0335603	0.0351709	0.023222	0.031	0.0366425	0.0258452	0.0271634	0.0282845	0.00330711	0.0141704	0.0166647	0.0232588	0.0214612	0.0260052	0.0272672	0.00741957	0.0440367	0.0267143	0.023672	0.041393	0.0124807	0.0253276	0.0195155
1002	25.616	886726	129.1	1-monolinolein	76.5	0.12518	0.126273	0.126927	0.127164	0.128862	0.128693	0.12611	0.0144582	0.129845	0.131919	0.00499685	0.13008	0.000544289	0.0065199	0.00322247	0.130559	0.124821	0.129885	0.123541	0.00411153	0.131763	0.128683	0.125928	0.00719546	0.0115205	0.00862917	0.127007	0.125726	0.00271666	0.00322364	0.00483396	0.00404803	0.128545	0.131827	0.131513	0.131793	0.00283731	0.00524094	0.125927	0.131573	0.00327784	0.132139	0.138768	0.00403502
1006	25.666	886731	324.1	Guanosine	79.5	0.000142347	0.000126713	0.00016745	0.0001135	8.9363e-05	8.88675e-05	0.000202787	0.000195454	0.000377033	0.00036133	0.000159264	0.000330559	0.000182098	0.000145258	0.000185301	0.000352392	0.000269095	0.000241017	0.000173971	0.000210706	0.000193019	0.000172176	0.000251962	0.000202984	0.0002646	0.000394786	0.00010514	0.000153286	0.000316753	0.000123144	0.000211646	0.000127621	0.000198934	0.000124356	0.000290704	0.000162841	0.000101909	0.000131308	0.000155862	0.000179489	0.000244481	0.000165885	7.99528e-05	0.000120302
1008	25.719	886737	223.1	4',5-dihydroxy-7-glucosyloxyflavanone	82.2	0.000254855	0.000160761	0.000127818	8.33911e-05	8.37716e-05	0.000117205	8.06177e-05	0.000223546	0.00022902	0.000208226	0.000123752	0.000122057	0.000201249	9.29401e-05	0.00013296	0.000147269	0.000308161	0.000166592	0.000320623	0.000227843	0.000159101	0.000132582	0.000174722	0.000148328	0.000190166	0.000153528	0.000111165	0.00014902	0.000144352	6.16188e-05	0.000240442	0.000310001	0.000134818	0.000198246	0.000289848	0.000168979	0.000152802	0.000163938	0.000233457	0.000118226	0.000136865	0.000135936	0.000153365	0.000224811
1009	25.743	886739	399.342	Glycerol monostearate	98.9	0.0140854	0.0149082	0.0152965	0.0156266	0.0167321	0.018414	0.0193219	0.0224693	0.0184266	0.0199976	0.0202916	0.020208	0.0193731	0.0185626	0.0177422	0.0202082	0.0212567	0.0206821	0.0202714	0.0200888	0.0196299	0.0182555	0.019352	0.0239882	0.0186077	0.022183	0.0183255	0.0189642	0.0193442	0.0161667	0.0210929	0.0194586	0.0200419	0.0182886	0.0192447	0.0182288	0.0149712	0.0193137	0.0196459	0.0194714	0.0190233	0.0187488	0.0194519	0.020118
1013	25.802	886745	209.1	Piceatannol	64.9	0.000455592	0.000466439	0.00021405	0.00034311	0.000288281	0.000530031	0.000159191	0.000205802	0.000165487	0.00683491	0.000256151	0.000555974	0.000128067	0.000517266	0.000603357	0.000557565	0.0009999	0.000782592	0.000389622	0.000337622	0.000727651	0.000580469	0.000340677	0.000499054	0.000519953	0.000474125	0.000668272	0.00040257	0.000534587	0.00028963	0.000509787	0.000564954	0.000677493	0.000403657	0.000509792	0.000606648	0.00056217	0.000653382	0.000633147	0.000612442	0.000684009	0.000448584	0.000242014	0.000225897
1014	25.834	886748	117.1	Heptaethylene glycol	99.1	0.0146297	0.0155103	0.0151896	0.0152351	0.0160778	0.0158206	0.0243666	0.0509663	0.0377477	0.0201496	0.0247698	0.042708	0.0199435	0.0221993	0.000601797	0.000328774	0.0335458	0.0526562	0.0259049	0.0470127	0.0403463	0.0488178	0.0364254	0.0556316	0.0159049	0.0505277	0.034076	0.0401195	0.0325536	0.0196292	0.038894	0.0359665	0.0388189	0.031912	0.0281804	0.0304568	0.029764	0.0430168	0.031157	0.000970931	0.0744223	0.0280826	0.0471901	0.0324285
1017	25.905	886756	397.2	4-hydroxyanthraquinone-2-carboxylic acid	76.1	1.33774e-05	3.82911e-05	7.07192e-05	5.08212e-05	3.58335e-05	4.93131e-05	0.000101299	0.000204232	8.55326e-05	6.99515e-05	7.35927e-05	0.000197358	8.42061e-05	0.000153048	5.54789e-05	0.000125849	8.35292e-05	7.57444e-05	0.000323907	0.000205968	0.000124758	0.000106128	0.000105269	0.000128373	0.000130682	0.0001421	8.86197e-05	7.55026e-05	0.000396869	1.91954e-05	0.00012975	6.94043e-05	0.000332365	7.15697e-05	8.65919e-05	0.00012527	2.64087e-05	0.000127654	0.000126077	5.96486e-05	0.000282362	6.82183e-05	8.61717e-05	7.26849e-05
1018	25.939	886759	295.2	Acetaminophen glucuronide	83.8	0.000269941	0.000312246	0.000323957	0.000373248	0.00036594	0.000393196	0.000363309	0.000118953	0.000246767	0.000295059	0.000278504	0.077241	0.000232866	0.000245106	0.000206599	0.000255207	0.000897826	0.000238431	0.000132969	0.000221044	0.000285323	0.000551854	0.000369555	0.000758472	0.000948424	0.000262469	0.000153098	0.000202522	0.000304649	0.000346894	0.000278504	0.000173755	0.000210074	0.000257768	0.000283968	0.000209645	0.000168987	0.000138085	0.00015528	0.000312793	0.000138007	0.000557089	0.000213506	0.000194383
1022	26.004	886766	204.1	Maltotriose	93.6	0.000440743	0.00053462	0.00076982	0.000680753	0.000674814	0.000639085	0.000269938	6.1932e-05	5.0469e-05	0.00038932	0.000538664	0.000262717	0.000215689	0.00062239	0.000651144	0.000516395	0.000620249	0.000226181	0.00171364	0.000537207	0.000947025	0.000553055	0.000458667	0.000576112	0.000561	0.000567094	0.000433085	0.000526063	0.00176476	0.00011919	0.000482329	0.000952599	0.000784392	0.000645448	0.000537508	0.000987488	0.000374443	0.0004209	0.00086506	0.000418193	0.000575407	0.00063973	0.0010888	0.000990269
1030	26.145	886780	204.183	Dimethyl hexopyranosiduronate	92.2	0.000431782	0.000321337	0.000356701	0.000422872	0.000420837	0.000597498	0.00162097	0.000690924	0.00346447	0.00185208	0.00413714	0.0105301	0.00340077	0.00462726	0.00623051	0.00736261	0.000574871	0.017057	0.000976764	0.00714092	0.00449599	0.00606674	0.00713237	0.0114722	0.00367939	0.00714148	0.0057638	0.00351926	0.00782888	0.00342876	0.00623038	0.00828114	0.00860601	0.00639572	0.00538666	0.00573363	0.00395163	0.0106101	0.00922789	0.00478015	0.00499936	0.00553228	0.00903701	0.00429217
1034	26.196	886785	393.2	Lanosterol	59.4	3.2422e-05	3.58754e-05	1.86859e-05	5.8592e-06	1.91371e-05	1.54839e-05	2.99784e-05	0.000321682	2.93005e-05	5.66184e-05	6.25715e-05	0.000277372	2.33547e-05	0.000142373	7.18717e-05	9.68484e-05	0.000125678	0.000131238	0.000223635	0.000102027	0.000105591	4.74597e-05	0.000112447	0.00014822	9.51405e-05	9.1468e-05	4.09903e-05	8.40182e-05	0.000109688	1.4106e-05	7.62324e-05	0.000101889	7.50844e-05	6.94746e-05	3.45275e-05	8.59929e-05	2.64597e-05	4.48249e-05	9.13554e-05	6.49196e-05	0.000120749	0.000109166	0.000185245	5.3259e-05
1035	26.231	886789	437.267	1-deoxy-1-piperidino-alpha-d-fructose	66.6	2.13701e-05	6.46175e-06	2.94823e-05	6.67746e-05	7.38633e-06	3.6968e-05	4.92251e-05	0.00177347	0.000105988	0.000438576	0.000540941	0.00293617	0.000516817	0.000887129	0.000726071	0.000513998	0.00140353	0.00112928	0.000400314	0.00110083	0.000514202	0.000674554	0.000568763	0.000863089	0.000537066	0.00096587	0.000779323	0.000507208	0.00131884	0.000499238	0.000774444	0.00145452	0.0013933	0.00131685	0.000954305	0.00106804	0.000419198	0.00313417	0.00150823	0.0010965	0.00160088	0.000433509	0.00522133	0.000609007
1046	26.557	886822	204.1	6-o-[alpha-d-glucopyranosyl]-d-fructose	92.8	0.0003114	0.000143164	0.000417343	0.000118107	0.000401672	4.56743e-05	0.000349149	0.000987932	0.000632981	0.00076491	0.000408351	0.0011548	0.000435144	0.00501842	0.000156222	0.000525745	0.000322805	0.0080997	0.000509853	0.00391096	0.000329017	0.000210963	0.000520946	0.000530396	0.000296652	0.000252881	0.000152189	0.000566554	0.000658477	0.000242616	0.0003334	0.00047624	0.000608448	0.000484541	0.000176266	0.000202966	4.62227e-05	0.000161495	0.00019613	7.21429e-05	0.000139319	0.0001868	0.00673749	0.000448641
1048	26.636	886830	266	2-aminobenzoic acid	67.2	8.2475e-05	0.00013242	0.000168654	0.000279	0.000117741	0.000148983	0.000230738	0.000444812	0.000262568	0.000335121	0.000152768	0.000450456	0.000274421	0.000142693	0.000346058	0.000300409	0.000210904	0.00017307	0.000203153	0.000294032	0.000165205	0.000408891	0.000301436	0.000267928	0.000330757	0.000310038	0.000168488	0.000153697	0.000354562	0.000280674	0.00025357	0.00018403	0.000364193	0.000250886	0.000369271	0.000271161	0.000138596	0.000171544	0.00025808	0.000242232	0.00020356	0.000170716	0.000280929	0.000107696
1051	26.856	886852	204.1	Melibiose	92	0.00137554	0.00141015	0.00142916	9.0959e-05	0.00152805	0.000104995	0.00341941	0.000329763	0.00165893	0.00025437	0.00257448	0.00433055	0.00224904	0.00288892	0.00257832	0.00166193	0.00142888	0.000401146	0.00398796	0.00283214	0.000520092	0.000273285	0.00206377	0.00255142	0.00245628	0.000315106	0.000203442	0.000208761	0.00241066	0.000156839	0.00182551	0.000263118	9.09133e-05	0.000338645	0.00178915	0.000230577	0.00120786	0.000218746	0.000113949	0.000167683	0.00191193	0.00151615	0.000633181	0.000174033
1052	26.923	886859	193.1	Inosine-5'-monophosphate	84.5	0.00795158	0.00833688	0.00860667	0.00838712	0.00872942	0.00829852	0.0225005	0.0187795	0.00748371	0.0196641	0.0151208	0.0169319	0.0108197	0.0145286	0.0152091	0.00895242	0.00951027	0.0185167	0.0234654	0.0147936	0.0149682	0.00865287	0.013128	0.0155422	0.0124952	0.00727882	0.0101525	0.0084791	0.0155803	0.0102984	0.0107124	0.0078737	0.0103886	0.00796791	0.0103383	0.0209642	0.00651735	0.0150861	0.0171622	0.0103044	0.00768879	0.0088992	0.0204457	0.00957921
1053	26.959	886863	417.321	Stigmasterol	65.7	0.000656408	0.000703281	0.000443911	0.000570155	0.000627021	0.000693218	0.00103385	0.000641275	0.000604255	0.000928389	0.00085576	0.000478295	0.000588086	0.000522243	0.000374117	0.000620391	0.00119588	0.000732692	0.000245905	0.000401076	0.00167027	0.000814561	0.00116421	0.00081871	0.000485581	0.000706653	0.000781187	0.000694203	0.00101053	0.000862629	0.000661969	0.000708682	0.000487666	0.000329638	0.000466255	0.00044339	0.00047334	0.00115386	0.000644669	0.000675786	0.000632913	0.000278481	0.000290417	0.000194216
1056	27.082	886875	223.1	4-(acetylamino)phenyl-alpha-d-glucopyranosiduronic acid	88.9	0.00248715	0.00248309	0.00249506	0.00241726	0.00263349	0.00256634	0.000132795	0.000341491	0.00469205	0.000274864	0.0107412	0.11958	0.00443456	0.0144514	0.0124586	0.000315144	0.000194676	0.000565117	0.010675	0.00493413	0.000681664	0.000807678	0.00662578	0.000877688	0.0126242	0.000388989	0.00076336	0.012708	0.0120108	0.000368723	0.000524126	0.00337136	0.0087693	0.00659618	0.00890814	0.00350451	0.00162188	0.000272821	0.0094732	0.00317936	0.00721155	0.0111014	0.00666105	0.00381832
1057	27.095	886877	488.468	Gamma-tocopherol	82.6	0.0031682	0.00312406	0.00318199	0.00301261	0.00335377	0.00314234	0.000137321	0.000160911	0.00749127	2.52634e-05	0.0185564	0.0194052	0.00751707	0.0242779	0.0205228	0.000208618	0.000186778	0.000100581	0.0175394	0.00848363	0.000811471	0.000140077	0.0105829	0.000268005	0.0212576	0.000363711	0.000609163	0.020936	0.0196886	0.000155789	0.000431816	0.00572091	0.0144125	0.0102034	0.0144585	0.00572471	0.00245135	0.000219533	0.0158638	0.00482956	0.0121888	0.0189313	0.0110684	0.00586362
1058	27.159	886883	227.036	4-chloro-2-hydroxy-acetophenone	67.3	0.0104511	0.0275241	0.0183694	0.0159984	0.0207361	0.0131547	0.00704565	0.0170568	0.0148188	0.0141669	0.0317142	0.053597	0.018991	0.0234007	0.028784	0.0369654	0.0219629	0.0314813	0.0302358	0.0430215	0.0467607	0.0246046	0.0227239	0.0513793	0.0488756	0.0480478	0.0331879	0.0362008	0.039389	0.0237062	0.0438126	0.0440583	0.0471133	0.0318852	0.0314512	0.0298858	0.0275262	0.0374163	0.0321713	0.0265311	0.0448859	0.0300702	0.0365885	0.0543586
1060	27.263	886894	129.083	Beta-glycerophosphoric acid	80.6	0.0268956	0.0272621	0.0333816	0.0258099	0.0272187	0.0276114	0.089444	0.132628	0.115748	0.0538564	0.0468173	0.0642032	0.0411959	0.0202211	0.0264441	0.0358162	0.0396102	0.041759	0.0418718	0.0748287	0.0322128	0.0120773	0.038681	0.139991	0.029772	0.0785317	0.0564242	0.0830921	0.0498125	0.0214415	0.053584	0.0585472	0.0681784	0.046031	0.0399122	0.0264934	0.0252419	0.0310578	0.0542986	0.0321182	0.051381	0.0431264	0.0351616	0.0372786
1062	27.302	886898	317.15	Glucuronic acid, methyl ester, 2-(4-chlorophenoxy)-2-methylpropanoate	65.6	0.00418069	0.00219741	0.0017635	0.00251875	0.00181992	0.00210195	0.00949055	0.0142165	0.0138536	0.00670382	0.00544922	0.0102397	0.00283926	0.00942682	0.00131803	0.00192063	0.000135567	0.00329231	0.00652574	0.00683424	0.00272601	0.000544499	0.00272822	0.0141805	0.0021223	0.00743159	0.00499025	0.0108509	0.00363529	0.00129115	0.00522939	0.00015627	0.00951439	0.00393761	0.00281909	0.00142685	0.00143398	0.000208504	0.00299165	0.00280107	0.00506015	0.00313311	0.000119907	0.00193654
1066	27.454	886913	315.106	5'-adenosine monophosphate	93.1	0.00167224	0.00178784	0.00164851	0.00187028	0.00176469	0.00178468	0.00153959	0.00733454	0.00190448	0.000643639	0.000737684	0.00226892	0.00784177	0.00298795	0.00131538	0.00237892	0.0226555	0.00291797	0.00382531	0.00708588	0.000930359	0.000559743	0.00600012	0.0220585	0.0190404	0.0047388	0.00435674	0.00549213	0.00274654	0.000746466	0.00149849	0.00205041	0.000671022	0.00097392	0.000851122	0.00190071	0.000971982	0.00153083	0.00174575	0.00242841	0.00633796	0.000536212	0.00385725	0.00326727
1072	27.787	886947	361.2	Trehalose	88.5	3.12566e-05	1.97029e-05	6.61664e-05	5.88641e-05	2.47361e-05	3.65868e-05	3.67004e-05	0.000364854	0.000205674	0.000106902	0.000139596	0.000672915	0.000119085	0.000169027	8.93432e-05	7.48849e-05	0.000164074	0.000192969	0.000146636	6.97561e-05	5.0823e-05	8.36946e-05	0.000205218	0.000503752	0.000243817	0.000122866	0.000270039	0.000236203	0.000282191	1.83237e-05	0.000177949	9.17959e-05	8.69186e-05	0.000261056	2.95885e-05	8.95677e-05	2.76468e-05	7.00402e-05	7.66992e-05	7.02001e-05	0.000112794	7.61074e-05	0.000203348	4.86137e-05
1074	27.916	886960	297.271	Methyl 2,5-dihydroxybenzoate	84	0.00348559	0.00867692	0.00721197	0.00579228	0.00513777	0.00486117	0.00467413	0.0139143	0.00642024	0.00740216	0.00693451	0.00788765	0.00570862	0.00577434	0.00652767	0.00977715	0.00674398	0.0110411	0.0112182	0.00944939	0.0126089	0.00544834	0.00608553	0.014387	0.0119214	0.00898568	0.00541007	0.00727214	0.00602149	0.00433885	0.00668363	0.00602323	0.00897723	0.00424951	0.00612056	0.00681085	0.00912002	0.0104481	0.005807	0.00721522	0.00722734	0.00495958	0.00631186	0.0103277
1075	27.972	886966	456.4	Cholesterone	85.1	0.00145474	0.0015021	0.00150825	0.00154124	0.0015634	0.00152362	0.00863159	0.0164977	0.00078856	0.00265075	0.00115469	0.000106506	0.000620913	0.000772999	0.000808684	0.0365206	0.00580897	0.011309	0.000858452	0.000679267	0.00168322	0.00352359	0.000916336	0.00973524	0.000263625	0.00177522	0.00156862	0.0008071	0.00176645	0.00341412	0.0111071	0.00181622	0.00106178	0.000274963	0.000522317	0.000393563	0.000183895	0.00663501	0.000768707	0.000329259	0.000467334	0.000422571	0.000428264	0.000423757
1076	28.181	886987	237.1	Alpha-tocopherol	89.2	0.00388713	0.00391194	0.00396839	0.00393403	0.004022	0.00402559	0.00201785	0.0018729	0.0190479	0.00253982	0.0121971	0.0157211	0.00630775	0.0408243	0.0446282	0.00100909	0.00228705	0.00197744	0.0615287	0.0288248	0.00629581	0.00195842	0.00370247	0.00195291	0.0729405	0.00273169	0.00228019	0.0196487	0.00611538	0.00167994	0.00118842	0.00156106	0.0346683	0.0604942	0.0687377	0.0300946	0.0363764	0.00234386	0.0286495	0.0336985	0.0478975	0.0462263	0.0294918	0.0283156
1079	28.377	887007	129.1	Beta-sitosterol	89.6	0.873176	0.867259	0.85766	0.861064	0.857197	0.852993	0.993586	1.28752	1.25187	1.42314	1.30669	0.00111234	1.26918	1.30576	1.30783	1.06307	1.14768	1.30674	1.80061	1.43572	1.74337	0.98651	1.33832	1.07366	1.19697	0.841217	1.16221	0.962354	1.33259	0.975581	1.11884	1.36175	1.43153	1.31372	1.57168	1.20588	0.93242	1.1132	1.49091	1.1043	1.48336	1.14006	1.02216	1.30244
1080	28.383	887008	129.1	Cholesterol	98.9	0.872966	0.867316	0.85766	0.860634	0.857455	0.852341	0.991751	1.28752	1.25308	1.42314	1.30573	0.77388	1.26837	1.30576	1.30784	1.06291	1.1476	1.30585	1.79928	1.43634	1.74235	0.986569	1.33832	1.07299	1.19697	0.840812	1.16235	0.962969	1.33178	0.975581	1.11925	1.36146	1.43094	1.31263	1.57059	1.20588	0.931832	1.1131	1.48976	1.10431	1.4829	1.13959	1.02104	1.30244
1081	28.484	887018	215.168	5beta-coprostanol	91.3	0.00112583	0.00111386	0.00109273	0.00105101	0.00112758	0.00112248	0.00199315	0.00124761	0.00151368	0.00187751	0.00105871	0.00114884	0.0017737	0.00430415	0.00178829	0.00124766	0.00200461	0.00227896	0.00405989	0.00214188	0.00172912	0.00226367	0.00239603	0.00169485	0.00134613	0.000779965	0.0017359	0.00186172	0.00188131	9.81088e-05	0.00108889	0.0014848	0.00145225	0.00195843	0.00176816	0.00113453	0.000968213	0.00101934	0.00150141	0.00100312	0.00157006	0.00183625	0.00138941	0.00124596
1084	28.647	887035	129.1	2-deoxy-d-erythro-pentofuranose 5-phosphate	77.3	0.00375638	0.00370785	0.0036867	0.00389667	0.00354437	0.00504482	0.00164535	0.0160884	0.0302556	0.00555002	0.000458248	0.0366423	0.00674981	0.000449349	0.0029468	0.0055292	0.00389062	0.00637267	0.00680202	0.00410721	0.00480751	0.00233241	0.00515823	0.0123321	0.00619326	0.0180578	0.00950916	0.0205399	0.00881846	0.00123836	0.00939992	0.00863713	0.0127274	0.00665223	0.00141985	0.00322647	0.00523696	0.00154222	0.00276387	0.00032875	0.000609877	0.00935864	0.0101303	0.00684357
1086	28.85	887055	129.1	D-fructose-1,6-bisphosphate	68.2	0.00125406	0.000882064	0.00204029	0.00150259	0.00215356	0.00154947	0.00821295	0.011893	0.00968052	0.00461888	0.00248175	0.0050168	0.00320927	0.0018808	0.00157015	0.00409505	0.00210571	0.00309748	0.00250447	0.00716203	0.00205384	0.00147234	0.00291717	0.0166081	0.00237363	0.00421608	0.00465815	0.00677797	0.00312642	0.00188474	0.00352091	0.00200448	0.00488931	0.003374	0.000680033	0.00149928	0.00233346	0.00335581	0.00332273	0.00298221	0.00264569	0.00221762	0.00278305	0.00263969
1089	28.929	887063	458.415	Lathosterol	95.1	0.00184649	0.00187092	0.00183578	0.00176166	0.00183275	0.00186804	0.000788046	0.00358641	0.00369594	0.00204036	0.00633051	0.00210472	0.00172509	0.00143618	0.0013896	0.00304376	0.00171121	0.000936292	0.00187358	0.00338516	0.00470382	0.00105348	0.00116591	0.00218137	0.003248	0.00204631	0.00383928	0.00264965	0.00600562	0.00197947	0.00422492	0.0067447	0.00313264	0.00227501	0.00382942	0.0037993	0.0017512	0.00129756	0.00577643	0.00317552	0.00765641	0.0039728	0.00103333	0.00336697
1096	29.574	887129	255.2	Deoxycholic acid	85.4	0.000862057	0.000915286	0.000861346	0.000848647	0.000895672	0.000895124	0.000668029	0.000668742	0.00135798	0.000548932	0.000163112	0.00220375	0.0266427	0.00194319	0.00125003	0.00195175	0.000673058	0.000247317	0.00092555	0.00109046	0.001154	0.00058347	0.000973903	0.00211393	0.000719889	0.000230931	0.000842648	0.000341364	0.000623043	0.000972703	0.00122062	0.00107456	0.00103294	0.000819781	0.00122177	0.0010631	0.00157185	0.000636912	0.00048687	0.00101658	0.00267803	0.00052256	0.00054908	0.00085026
1097	29.703	887142	426.3	Cholic acid	84.7	0.00011772	0.000104469	0.000103857	0.000112798	0.000108754	9.40249e-05	6.07696e-06	6.24245e-05	2.93884e-05	2.66351e-07	0.000137413	0.000441468	0.00467352	0.000532074	2.66351e-07	7.20967e-05	2.66351e-07	4.16251e-05	0.00105854	2.66351e-07	5.0318e-05	1.74938e-05	9.13001e-05	7.42717e-05	2.66351e-07	0.00100725	2.66351e-07	6.44346e-06	0.000205237	2.66351e-07	2.66351e-07	6.03389e-06	2.54861e-05	2.66351e-07	7.76685e-06	2.66351e-07	2.66351e-07	0.00018583	2.66351e-07	0.000313751	0.00122407	1.25952e-05	2.66351e-07	2.66351e-07
1098	29.836	887156	311.291	Labetalol	69.3	0.00589113	0.0137789	0.00513282	0.00321232	0.00543229	0.00756233	0.000899725	0.00318264	0.00793237	0.00507854	0.0152501	0.0158583	0.00578585	0.00742577	0.0125471	0.00983485	0.00867982	0.0112705	0.0123677	0.0121959	0.0140254	0.00710335	0.0065163	0.0111465	0.00830844	0.00572665	0.00476483	0.00446734	0.010943	0.0120129	0.0102851	0.00930746	0.00950597	0.00456207	0.0106443	0.0077565	0.00781934	0.00969763	0.0173397	0.0105676	0.00533947	0.00794017	0.00487687	0.00851863
1099	29.887	887161	428.346	Chenodeoxycholic acid	84.1	0.000483139	0.000526726	0.000537868	0.000457195	0.000551564	0.000425253	0.000105771	0.00103484	0.000468211	0.000150234	0.000838541	0.00576324	0.00997842	0.00189245	4.82422e-05	0.000968198	3.42595e-05	0.000280302	0.00242863	0.000254623	0.000421596	0.000383957	0.00183419	0.00183607	2.79688e-05	0.00195062	0.000402607	0.0013392	0.002843	5.74595e-05	0.000410233	0.000873498	0.000283412	0.000126182	0.000143249	0.000120577	2.05181e-05	0.000378621	0.000507323	0.00084602	0.0031415	0.000628649	0.000495716	3.34808e-05
[truncated: 3 more columns]
